# Supplementary material for: Repression by the Arabidopsis TOPLESS corepressor requires association with the core mediator complex
Source: eLife. 2021 Jun 2;10:e66739. doi: 10.7554/eLife.66739 (PMC8203292; doi:10.7554/eLife.66739)
Supplement: Supplementary file 1. — Sequences, names, and experimental uses of all oligonucleotides created in this study. [file elife-66739-supp1.xlsx]

## Sheet: Sheet1
	Oligo Name	Researcher	Sequence	Purpose
5039
5038
5037
5036
5025	Phic31-Cterm fwd	SG	agggatcctattactttgcgtc	Intein PhiC31
5024	PhiC31-Nterm rev	SG	ttcgatttttgtagtaggagtaccatc	Intein PhiC31
5023	tUBQ10 fwd	SG	agagactcttatcaagaatcccatc	Intein PhiC31
5022	ARF7 fix Tryp Rv	al	GGAGCAGCCCACCTCGGGTTG
5021	ARF7 fix Tryp Fw	al	CAACCCGAGGTGGGCTGCTCC
5020	tUBQ10_rev	SG	gatgggattcttgataagagtctc	tUBQ10_rev
5019	Venus_fwd_bis	SG	ctacggcctgcagtgcttc	Seq Venus
5018	Seq - NeoR/KanR 5' syn	SG	ctgcttgccgaatatcatggtg	Seqencing Kan plasmid transfo plant
5017	sJAB007_mCherry	SG	caacgtcaacatcaagttggacatca	mCherry control verif
5016	sJAB006_PIP2A	SG	ggagttggttttgtcaaagccttcc	mCherry control verif
5009	tUBQ1-P35S rev	SG	gactgtatctttgacatttttggagtaagcgcatttgtttgtctttaacaac	integrase control
5008	tUBA1-P35S fwd	SG	gttgttaaagacaaacaaatgcgcttactccaaaaatgtcaaagatacagtc	integrase control
5007	nos3-plasmid fwd	SG	ggtgtcatctatgttactagatcggaccacagaatcaggggataac	integrase control
5006	nos3-plasmid-rev	SG	gttatcccctgattctgtggtccgatctagtaacatagatgacacc	integrase control
5005	pPP2AA3-sp3-rev	SG	tgctgtgtaagatagatctacgcagaaataaccgttccttcctcaccaaaactcaaatcctttg	Term test
5004-04-01	Venus-sp4-fwd	SG	aggcaactgaaacgattcggatcctgtattactattcttaaatgtaaacagtgagcaaggg	Term test
5003	BIFC_backbone 5'	al	GGTGAAGGGGGCGGCC	ARF BIFC
5002	BIFC_backbone 3'	al	agtccgcaaaaatcaccagtctctctctac	ARF BIFC
5001	BIFC_ARF5 5'	al	GCCCCCTTCACCATGATGGCTTCATTGTCTTGTGTTGAAGAC	ARF BIFC
5000	BIFC_ARF5 3'	al	gtgatttttgcggactTTATGAAACAGAAGTCTTAAGATCGTTAATGCCTGC	ARF BIFC
4999	BIFC_ARF19 5'	al	GCCCCCTTCACCATGAAAGCTCCATCAAATGGATTTCTTCC	ARF BIFC
4998	BIFC_ARF19 3'	al	gtgatttttgcggactCTATCTGTTGAAAGAAGCTGCAGCAGAAGTG	ARF BIFC
4997	BIFC_TMO6 5'	al	GCCCCCTTCACCATGGATCATTTGTTACAACACCAGGATG	ARF BIFC
4996	BIFC_TMO6 3'Red r	al	gtgatttttgcggactCTACATTAAAGCACCAGAATTAATGTAGTTCATATTGGTCC	ARF BIFC
4995	BIFC_AGL42 5'	al	GCCCCCTTCACCATGGTTAGAGGAAAGATAGAGATGAAGAAAATAGAAAACG	ARF BIFC
4994	BIFC_AGL42 3'	al	gtgatttttgcggactCTAGCAGTTTCTATTTGGCAAACCGATGAATAAG	ARF BIFC
4993	BIFC_ARF2 5'	al	GCCCCCTTCACCATGGCGAGTTCGGAGGTTTCAATG	ARF BIFC
4992	BIFC_ARF2 3'	al	gtgatttttgcggactTTAAGAGTTCCCAGCGCTGGACAATG	ARF BIFC
4991	BIFC_ARF7 5'	al	GCCCCCTTCACCATGAAAGCTCCTTCATCAAATGGAGTTTCTC	ARF BIFC
4990	BIFC_ARF7 3'	al	gtgatttttgcggactTCACCGGTTAAACGAAGTGGCTGAG	ARF BIFC
4977	pFwd_PB target GA	SG	cgactcactatagggcggagcgattgatgcatgttgtcaatcaattg	PB target_vector Kan
4976	pRev_Vector pGreen target	SG	caattgattgacaacatgcatcaatcgctccgccctatagtgagtcg	PB target_vector Kan
4975	pFwd_Vector pGreen GA target	SG	caagtgaaagtgtatgttcgctgccacagaatcaggggataac	PB target_vector Kan
4974	pRev_PB target GA	SG	gttatcccctgattctgtggcagcgaacatacactttcacttg	PB target_vector Kan
4973	MED21_i214G_long_R	ARL	GTTGTAGCGGGTGGTTCAGGATAATTAGGTGAAAGCTGGtCTGGTGGTGCATCCCTTTGC	MED21 CRISPR dCAPS primer
4972	5'6-FAM-MED21_PstIdCAPS_R	ARL	TAATTAGGTGAAAGCTGGACTGGTGGTGCATCCCTcTGC	MED21 CRISPR dCAPS primer
4971	MED21_i215G_long_F	ARL	CAAGTGAATACGATTGCTGCT	Med21_i214G_dCAPS
4960	ARF19 qPCR Rv	al	AAAACGCCGCAAAGTGTCAG
4959	ARF19 qPCR Fw	al	TTTCCCGTGTGAGTTGTGAC
4958	ARF7 qPCR Rv	al	TCTACAGTGCCCAGTGGAAAC
4957	ARF7 qPCR Fw	al	TTCGTTTAACCGGTGATGGC
4956	TMO6 qPCR Rv	al	ccccaaccccattttgcaag
4955	TMO6 qPCR Fw	al	tgggagtagaaaagggtggtag
4954	HDA3 qPCR Rv	al	ACTCTGCTATTGGCCAACAGA
4953	HDA3 qPCR Fw	al	CGGCCAGTCAAGTCTCATGT
4952	HD2B qPCR Rv	al	CCTTGAGAATTCGCTAGTCCTC
4951	HD2B qPCR Fw	al	AACGACGAGAGACTCTTGTTCC
4950	HDT4 qPCR Rv	al	TTTGCAAGAGGGACCACAAG
4949	HDT4 qPCR Fw	al	TCCTCCGAGCAAAAAGATGC
4948	OFP8 qPCR Rv	al	TCAGCCGGTGCAAATATCTG
4947	OFP8 qPCR Fw	al	TCAAAGGCGGAGAGTTTTGC
4946	BRXL1 qPCR Rv	al	ATGTCTTGGCATGCACTTCC
4945	BRXL1 qPCR Fw	al	AATGCAAGGTGAGTGGGTTG
4944	LRP1 qPCR Rv	al	TTTTCGTGCGGGTGTTTCAG
4943	LRP1 qPCR Fw	al	GCTGCAACAGACGACGTATC
4942	AIL6 qPCR Rv	al	AAGAACTCAGCCGGATTTGG
4941	AIL6 qPCR Fw	al	ACAACAGCAACACCAACAGC
4932	MED10BF	ARL	TGTGACCGTTGCTGATGATT	MED10B Sequencing
4931	MED10BR	ARL	TCCATGGGGATTTGAATGTT	MED10B Sequencing
4929	gMED21_R4	ARL	GTAGCGGGTGGTTCAGGATA	MED21 CRISPR sequencing
4928	gMED21_F4	ARL	ACCACCAATTTTGTGCCATT	MED21 CRISPR sequencing
4925	2ndEAR2A_R2	ARL	gctttagcATCAACTGTTTCGGAGAAG	UAS TPL-IAA14 cloning
4924	2458DelH9_F	ARL	CCAGCTTTCTTGTACAAAG	TPL Mutagenesis primer
4923	2458DelH9_R	ARL	ATTTCTAAGAGTAGGGAAC	TPL Mutagenesis primer
4922	2458DelH8-9_R	ARL	GTCCCCATACTTGGATAAC	TPL Mutagenesis primer
4921	2458DelH7L-9_R	ARL	CAATGTCAAGAGCTGTGTTATTTC	TPL Mutagenesis primer
4920	2458DelH6-9_R	ARL	GGGACGATCATGCTTATC	TPL Mutagenesis primer
4919	2ndEAR2A_F	ARL	taatgctCAATCTAACAAACAAGGACATG	UAS TPL-IAA14 cloning
4918	2ndEAR2A_R	ARL	gctttagcATCAACGGTCTCGGAGAAG	UAS TPL-IAA14 cloning
4917	MED21_BiFC_del5_F	ARL	CAGTTGCAAGAACAAGTG	BiFC mutagenesis
4916	MED21_BiFC_Del5_R	ARL	TTTGAAGCCTGCTTTTTTG	BiFC mutagenesis
4915	TPL_BiFC_H8muta_F	ARL	cgctgctCTGATTGAGGCGAATCCTTTATTC	BiFC mutagenesis
4914	TPL_BiFC_H8muta_R	ARL	agagcagCCAACATGATCGCTCTTG	BiFC mutagenesis
4913	At_cMED21_F	ARL	TGCTGCACTTCCTTTGTCAG	MED21 CRISPR sequencing
4912	At_cMED21_R	ARL	GTCAGCAGCTTGTCCAAACA	MED21 CRISPR sequencing
4911	At_gMED21_F1	ARL	GGAAAGGCCACCTTAAAAGC	MED21 CRISPR sequencing
4910	At_gMED21_F2	ARL	TTCGCCATTTTGATCCTCTC	MED21 CRISPR sequencing
4909	At_gMED21_F3	ARL	CCAATTCGCAGCGATTATCT	MED21 CRISPR sequencing
4908	At_gMED21_R1	ARL	GACCTGGAGTTCAGCGATTC	MED21 CRISPR sequencing
4907	At_gMED21_R2	ARL	TCGGTGTGACTTGTTTGACC	MED21 CRISPR sequencing
4906	At_gMED21_R3	ARL	aCAGGACAAAGCGGTTAGACA	MED21 CRISPR sequencing
4905	FaNES1_end_F	Dante	GAAACGCCCGCGATCATTTC	Sequencing
4904	pENTR-ZmIAA14 F	Romi	AAAAAGCAGGCTCACAAATGGCTGGCGCCGA	14 pENTR
4903	pENTR-ZmIAA14 R	Romi	AGAAAGCTGGGTTCAGCTCTTGTTCTTGCACTT	14 pENTR
4902	pENTR-ZmIAA28 F	Romi	AAAAAGCAGGCTCACAAATGTCGCCTCCACTCGA	28 pENTR
4901	pENTR-ZmIAA28 R	Romi	AGAAAGCTGGGTTCAGTTGCGGTTCTTGGAC	28 pENTR
4900	mCherry_Fwd	SG	ccccgtaatgcagaagaaga	Genotyping
4899	pAIL6_Rev	SG	GAGTAACGGTGACTATCACG	Genotyping
4898	Pdr18 fd F	Romi	TCAGCCGTTTCTTTTTCGCTTCCTTACG	Pdr18 KO
4897	Pdr18 fd R	Romi	CAGCCAGCGCCTGGTCTTCCT	Pdr18 KO
4896	Pdr18 fu F	Romi	CCCCGGTAGGCCAAACATGTGGT	Pdr18 KO
4895	Pdr18 fu R	Romi	CCTCTGAACGTTGGCAATTTGACAGTGA	Pdr18 KO
4894	p1521_delTGA_F	ARL	CACCCAGCTTTCTTGTAC	BiFC mutagenesis
4893	p1521_delTGA_R	ARL	TTCAGGTTTCTTCATGTTC	BiFC mutagenesis
4892	p1984_N188_F	ARL	TAGAGTCCGCAAAAATCAC	BiFC mutagenesis
4891	p1984_N188_R	ARL	ATTTTTACAAAGCTGGTGTTG	BiFC mutagenesis
4890	p1982_N188_F	ARL	TGATATCTAGAGTCCGCAAAAATC	BiFC mutagenesis
4889	p1982_N188_R	ARL	ATTTTTACAAAGCTGGTGTTG	BiFC mutagenesis
4888	QC OsAFB2 F	Romi	TGAGAAGCTTTACGTTTATAGAACAACGGC
4887	QC pENTR R	Romi	TGAGACACGGGCCAGAG
4886	Pdr18 frag F	Romi	CCCTTTATAACGTAAGCGTC
4885	Pdr18 frag R	Romi	ATAGCCTTGATTACCAATGT
4882	crAtMed21_F1	ARL	ATATATGGTCTCGATTGTTCAAGGTCTTTTAAGGTTTGTTTTAGAGCTAGAAATAGC	MED21 CRISPR
4881	crAtMed21_F2	ARL	ATATATGGTCTCGATTGTCTTTTAAGGTTTTGGAAGAGTTTTAGAGCTAGAAATAGC	MED21 CRISPR
4880	crAtMed21_R1	ARL	ATTATTGGTCTCGAAACAAAGCATTGAAAGTGATAGCAATCTCTTAGTCGACTCTAC	MED21 CRISPR
4879	crAtMed21_R2	ARL	ATTATTGGTCTCGAAACAAAAGCATTGAAAGTGATAGAATCTCTTAGTCGACTCTAC	MED21 CRISPR
4878	crAtMed21_R3	ARL	ATTATTGGTCTCGAAACTTGCAGTGTCCCAAAAGCATAATCTCTTAGTCGACTCTAC	MED21 CRISPR
4877	crAtMed21_R4	ARL	ATTATTGGTCTCGAAACTTTGCAGTGTCCCAAAAGCAAATCTCTTAGTCGACTCTAC	MED21 CRISPR
4876	crAtMed21_R5	ARL	ATTATTGGTCTCGAAACCCAGTCCAGCTTTCACCTAAAATCTCTTAGTCGACTCTAC	MED21 CRISPR
4875	(3xFlag-GS_link)_tUBQ1-SplitKanR-F	Dante	CTCGGCATGGACGAGCTGTACGGATCTGGTGGAGATTACAAGGATCATG
4874	(3xFlag-GS_link)_Venus-R	Dante	GATCCTTGTAATCTCCACCAGATCCGTACAGCTCGTCCATGCCGA
4873	(GS12C)_Venus-F	Dante	GGCAGTGGCTCAGGATCAGGATCTGGATCTGGCTCTGTGAGCAAGGGCGAGGAGC
4872	(GS12C)_FaNES1-COYCOXIV-R	Dante	AGAGCCAGATCCAGATCCTGATCCTGAGCCACTGCCCATGGAGACTGTTTCATATAGC
4871	(COYCOXIV)_pUBQ1-R	Dante	GATTGACGCAAGGACAGCATCTTTTGTGTTTCGTCTTCTCTCACG
4870	(pUBQ1)_COYCOXIV-FaNES1-F	Dante	GAGAAGACGAAACACAAAAGATGCTGTCCTTGCGTCAATCTATC
4869	pENTR-ZmAFB2/3b2_F_GW	Sab	AAAAAGCAGGCTCACAAATGACATACTTCCCGGGC	59
4868	pENTR-ZmAFB2/3b2_fixed_R_GW	Sab	AGAAAGCTGGGTTTACAGTATCTGTACAAAGTTAGG	55
4867	pENTR-ZmAFB2/3b1_fixed_F_GW	Sab	AAAAAGCAGGCTCACAAATGACGTATTTCCCAGAAG	54
4866	pENTR-ZmAFB2/b1_fixed_R_GW	Sab	AGAAAGCTGGGTTTAGCTTTGCAGAATCTTAAC	54
4865	pENTR-ZmAFB2/3a_fixed_F_GW	Sab	AAAAAGCAGGCTCACAAATGGCGTACTTTCCAGACGA	55
4864	pENTR-ZmAFB2/3a_fixed_R_GW	Sab	AGAAAGCTGGGTTTATAGAATACTCACGAACCC	54
4863	pENTR-OsTIR1_f_GW	Sab	AAAAAGCAGGCTCACAAATGGGTAGAGGGGG	55
4862	pENTR-OsTIR1_fixed_R_GW	Sab	AGAAAGCTGGGTTTATAGCCCGTGCATCT	54
4861	pENTR-OsAFB2_F_GW	Sab	AAAAAGCAGGCTCACAAATGACCTATTTCCCTGAGG	55
4860	pENTR-OsAFB2_fixed_R_GW	Sab	AGAAAGCTGGGTCTATAGAATTTTAACGAAATTTGGC	55
4859	pENTR-AtAFB2_fixed_F_GW	Sab	AAAAAGCAGGCTCACAAATGAATTATTTCCCAGATGAAG	54
4858	pENTR-AtAFB2_fixed_R_GW	Sab	AGAAAGCTGGGTTTAGAGAATCCACACAAATGG	55
4857	pUBQ10 Rv primer w/ AGL42 overhang	al	CTCTAACCATCTGTTAATCAGAAAAACTCAGATTAATCGACAAATTCG
4856	AGL42 Fw primer w/ pUBQ10 overhangs	al	GTTTTTCTGATTAACAGATGGTTAGAGGAAAGATAGAGATGAAGAAAATAGAAAACG
4848	QC 5GY-AtTIR1	Romi	CTTCGTCTGGAACATGGACCAAG
4847	QC 5GY-AtAFB2	Romi	GGATAAGTTGTATCTGTACCGGACTGT
4846	QC 5GY-OsAFB2	Romi	AACTATTGCTGGGCCCCG
4845	QC 5GY-OsTIR1	Romi	AACTATTGCTGGGCCCC
4844	QC 5GY-ZmTIR1/AFB1	Romi	TGAGACACTTTACGTGTACCGTACT
4843	QC 5GY-ZmAFB2/3 a	Romi	TGATATGTTATATTTGTATAGAACTTTGGCGGG
4842	QC 5GY-ZmAFB2/3 b1	Romi	ACTATACGTCTATCGTACCACGGC
4841	QC 5GY-ZmAFB2/3 b2 F	Romi	TGATAAACTGTACGTCTATAGAACAACTGC
4840	QC pGP5G2-YFP-ccdB F	Romi	GATCTCAGCCACCGCGAAAA
4839	QC pGP5G2-YFP R	Romi	GGGCACGGGCAGCTTG
4838	QC pGILDA-AtAFB2 R	Romi	AGAGATATAGCATTCCTGTCTTTG
4837	QC pGILDA-ZmAFB2/3 b2 R	Romi	AGTGACACCGTGTTCCT
4836	QC pGILDA-ZmAFB2/3 b1 R	Romi
4835	QC pGILDA-ZmAFB2/3 a R	Romi	AAGCTAACCGCATTTCTATCTT
4834	QC pGILDA-OsTIR1 R	Romi	TGTTCCCATACTTCGTCAGG
4833	QC pGILDA-OsAFB2 R	Romi	AGGGACACAGTATTTCTGTCA
4832	QC pB42-ZmIAA14 R	Romi	GGCCTGGCGGCGGCA
4831	QC pB42-ZmIAA28 R	Romi	GTGGCAGCCACGACACGG
4830	RBCS1A_btwn_R	EY	CAACAATGAGAACAAGCTTTGGAGTG	Make Double-Guided RBCS1A
4829	RBCS1A_btwn_F	EY	CACTCCAAAGCTTGTTCTCATTGTTG	Make Double-Guided RBCS1A
4828	pB42-ZmIAA14 F	Romi	ACAAAAAAGCAGGCTTCAAAatgGCTGGCGCCGA	Y2H pB42 IAAs
4827	pB42-ZmIAA14 R	Romi	TTTGTACAAGAAAGCTGGGTTCAGCTCTTGTTCTTGCACTTAT	Y2H pB42 IAAs
4826	pB42-ZmIAA28 F	Romi	ACAAAAAAGCAGGCTTCAAAatgTCGCCTCCACTCGA	Y2H pB42 IAAs
4825	pB42-ZmIAA28 R	Romi	TTTGTACAAGAAAGCTGGGTTCAGTTGCGGTTCTTGGAC	Y2H pB42 IAAs
4824	YFP F	Romi	ctggggaatataaggtctccGGATCTGGTGGAGTGAGC	pGP5GY-ccdB
4823	YFP R	Romi	gggagcctgacatagaactaTTGATGTCCACCACCTGG	pGP5GY-ccdB
4822	pGP5G2 bb F	Romi	TAGTTCTATGTCAGGCTCCCT	pGP5GY-ccdB
4821	pGP5G2 bb R	Romi	GGAGACCTTATATTCCCCAGAAC	pGP5GY-ccdB
4820	pGP5GY_F_ZmTIR1/AFB1	Romi	agtggatcccccatcacaaaATGGGACGTGGCGGA	YFP-TIR1/AFBs gene frag
4819	pGP5GY_R_ZmTIR1/AFB1	Romi	ttgctcactccaccagatccCAGTATTTGTACGCAAGCAGG	YFP-TIR1/AFBs gene frag
4818	pGP5GY_F_ZmAFB2/3 b2	Sab	agtggatcccccatcacaaaATGACATACTTCCCGGGC	YFP-TIR1/AFBs gene frag
4817	pGP5GY_R_ZmAFB2/3 b2	Sab	ttgctcactccaccagatccCAGTATCTGTACAAAGTTAGGGGC	YFP-TIR1/AFBs gene frag
4816	pGP5GY_F_ZmAFB2/3 b1	Sab	agtggatcccccatcacaaaATGACGTATTTCCCAGAAGAAGTC	YFP-TIR1/AFBs gene frag
4815	pGP5GY_R_ZmAFB2/3 b1	Sab	ttgctcactccaccagatccGCTTTGCAGAATCTTAACGAAATTG	YFP-TIR1/AFBs gene frag
4814	pGP5GY_F_ZmAFB2/3 a	Sab	agtggatcccccatcacaaaATGGCGTACTTTCCAGACG	YFP-TIR1/AFBs gene frag
4813	pGP5GY_R_ZmAFB2/3 a	Sab	ttgctcactccaccagatccTAGAATACTCACGAACCCAGGG	YFP-TIR1/AFBs gene frag
4812	pGP5GY_F_OsAFB2	Sab	agtggatcccccatcacaaaATGACCTATTTCCCTGAGGAGG	YFP-TIR1/AFBs gene frag
4811	pGP5GY_R_OsAFB2	Sab	ttgctcactccaccagatccTAGAATTTTAACGAAATTTGGCGCAT	YFP-TIR1/AFBs gene frag
4810	pGP5GY_F_OsTIR1	Sab	agtggatcccccatcacaaaATGGGTAGAGGGGGGAG	YFP-TIR1/AFBs gene frag
4809	pGP5GY_R_OsTIR1	Sab	ttgctcactccaccagatccTAGCCCGTGCATCTCCATA	YFP-TIR1/AFBs gene frag
4808	pGP5GY_F_AtTIR1	Sab	agtggatcccccatcacaaaATGCAGAAGCGAATAGCCTT	YFP-TIR1/AFBs gene frag
4807	pGP5GY_R_AtTIR1	Sab	ttgctcactccaccagatccTAATCCGTTAGTAGTAATGATTTGCCT	YFP-TIR1/AFBs gene frag
4806	pGP5GY_F_AtAFB2	Sab	agtggatcccccatcacaaaATGAATTATTTCCCAGATGAAGTAATAGAG	YFP-TIR1/AFBs gene frag
4805	pGP5GY_R _AtAFB2	Sab	ttgctcactccaccagatccGAGAATCCACACAAATGGCG	YFP-TIR1/AFBs gene frag
4804	pGP5GY_bb_F	Sab	tttgtgatgggggatccac	YFP-TIR1/AFBs backbone
4803	pGP5GY_bb_R	Sab	ggatctggtggagtgagc	YFP-TIR1/AFBs backbone
4788	H3-8-145-149-A_R	ARL	agagcagcCAACATGATCGCTCTTGCAG	TPL Mutagenesis primer
4787	H3-8-145-149-A_F	ARL	cgctgctCTGATTGAGGCGGGGAGA	TPL Mutagenesis primer
4786	pGILDA 65C R	SG	TTTGAAGCCTGCTTTTTTGTACAAAGTTGT	Y2H backbone
4785	pGILDA 65C F	SG	TAACACCCAGCTTTCTTGTACAAAGTGG	Y2H backbone
4784	RBCS1A_int_R2	EY	CTTCTCAAGTCTCCATCTTCC
4783	RBCS1A_int_F2	EY	CATAATAAGAAACCTAATTGG
4782	Hyg_Genotyping_F	HG	TCGGACCGCAAGGAATCGGT
4781	Hyg_Genotyping_R	HG	AGCGCGTCTGCTGCTCCATA
4780	dCas9_Genotyping_F	HG	GGGTGCTTCTGCCCAATCCTT
4779	dCas9_Genotyping_R	HG	ACCTTGACCAGAGACTTGGGCCT
4778	pp2a3_Genotyping_F	HG	AGGCGACTAACAGCTGGAAAGAGA
4777	pp2a3_Genotyping_R	HG	GCATGCAGCCTGTGAAAAGCCC
4776	dCas9_int_5_F	EY	ggtactgccttgattaagaagtatc	Seq dCas9
4775	dCas9_int_2_F	EY	gatggtggtgcttctcaagaagaat	Seq dCas9
4774	dCas9_int_1_F	EY	ccgataaggctgatttgagattgat	Seq dCas9
4770	H3-8-145-149-A_F	ARL	cgctgctCTGATTGAGGCGGGGAGA	TPL Mutagenesis primer
4769	H3-8-145-149-A_R	ARL	agagcagcCAACATGATCGCTCTTGCAG	TPL Mutagenesis primer
4768	ARF19 mid-Fw sequencing	al	GCAGCAGTCAATGCTCCCTACTG	ARF19 sequencing
4767	pUAS_sp4-fwd	SG	aggcaactgaaacgattcggatcctgtattactattcttaatcgggtgacagccctcc
4766	DIG-pBLUNT-rev plasmid	SG	CGAAGGCTTTAATTTGCGGCCctcctgagaccacagagtgcctgaattctgcagatatccatcacac
4765	pGILDA-Zmb2 R _fixed	Romi	ttgtacaagaaagctgggtgttaCAGTATCTGTACAAAGTTAGGGGC	PCR Y2H
4764	pGILDA-Zmb1 R _fixed	Romi	ttgtacaagaaagctgggtgttaGCTTTGCAGAATCTTAACGAAATTG	PCR Y2H
4763	pGILDA-Zma R _fixed	Romi	ttgtacaagaaagctgggtgttaTAGAATACTCACGAACCCAGGG	PCR Y2H
4762	pGILDA-OsT R _fixed	Romi	ttgtacaagaaagctgggtgttaTAGCCCGTGCATCTCCATA	PCR Y2H
4761	pGILDA-OsA R_fixed	Romi	ttgtacaagaaagctgggtgttaTAGAATTTTAACGAAATTTGGCGC	PCR Y2H
4760	pGILDA-F_fixed	Romi	TAACACCCAGCTTTCTTGTACAAA	PCR Y2H
4759	DIGmut_R	SG	TTGGGAGAGTAGCGACAC	DIGbsaI_mut
4758	DIGmut_F	SG	AACCAAAAGGAGTCCGCTGACTAGG	DIGbsaI_mut
4757	L0-I22 rev	SG	acgttgatggtctcaaagcttattagtacagctcgtccatgccg	Integrase in plant
4756	ScMED21_NswapAt_F	ARL	atctcaCAATTGCAGATATGTTTAGAC	N-terminal Sc to At swap of MED21
4755	ScMED21_NswapAt_R	ARL	tatatcCATTGTTAAAGAGCATATAATG	N-terminal Sc to At swap of MED21
4754	ScMed21_1xMYC_F	ARL	agcgaagaagatctgTAAGGCGCGCCACTTCTAAATAAG	ScMED21 Tag optimization
4753	ScMed21_1xMYC_R	ARL	aatcagtttctgttcAGCACCACCACCACCAGA	ScMED21 Tag optimization
4752	ScMed21_2xMYC_F	ARL	gaacagaaactgattagcgaagaagatctgTAAGGCGCGCCACTTCTAAATAAG	ScMED21 Tag optimization
4751	ScMed21_2xMYC_R	ARL	cagatcttcttcgctaatcagtttctgttcAGCACCACCACCACCAGA	ScMED21 Tag optimization
4750	L1-tOCS-R	EY	AGATCCTGAGCCACTACCTGATCCAGAACCCTGCTTTAATGAGATATGCGAGACG	Make Non-ratio reporter
4749	ARF5 DBD Fw w/ bb overlap	al	CAAAAAAGCAGGCTTCAAAATGATGGCTTCATTGTCTTGTGTTGAAGAC	domain swaps
4748	ARF5 DBD Rv w/ ARF19 MR overlap	al	GTACCCATATATCTACGTTTCCCGGAATCTTCAGTTTCAAACATC	domain swaps
4747	ARF19 DBD Fw w/ bb overlap	al	CAAAAAAGCAGGCTTCAAAATGAAAGCTCCATCAAATGGATTTCTTCC	domain swaps
4746	ARF19 DBD RV w/ ARF5 MR overlap	al	CATGTACCTTCGAACCCCACAATCCTCAGTCTCAAACATC	domain swaps
4745	ARF5 MR Fw w/ ARF19 DBD overlap	al	GTGGGGTTCGAAGGTACATGGGAACTATTGTTGGAATC	domain swaps
4744	ARF5 MR Rv w/ ARF19 PB1 overlap	al	CCACCATTCATGATTCCACTATTTTGCCGCAGACTACAATCATCAAAATC	domain swaps
4743	ARF19 MR Fw w/ ARF5 DBD overlap	al	GGAAACGTAGATATATGGGTACAGTCACAGGTATTAGTGATCTTG	domain swaps
4742	ARF19 MR RV w/ ARF5 PB1 overlap	al	CATGATGAGCCTTTTGAATCATTGATGCCGCCAAC	domain swaps
4741	ARF5 PB1 Fw w/ ARF19 MR overlap	al	GATTCAAAAGGCTCATCATGGCAGAAAATTGC	domain swaps
4740	ARF5 PB1 Rv w/ bb overlap	al	CAAGAAAGCTGGGTGTTATGAAACAGAAGTCTTAAGATCGTTAATGCCTGC	domain swaps
4739	ARF19 PB1 Fw w/ ARF5 MR overlap	al	GTGGAATCATGAATGGTGGAGGACTGTG	domain swaps
4738	ARF19 PB1 Rv w/ bb overlap	al	CTTTGTACAAGAAAGCTGGGTGCTATCTGTTGAAAGAAGCTGCAGCAGAAGTG	domain swaps
4737	8A bb 3' Fw	al	CACCCAGCTTTCTTGTACAAAGTGGtg	domain swaps
4736	8A bb 5' Rv	al	CATTTTGAAGCCTGCTTTTTTGTACAAACTTGtg	domain swaps
4735	PUAS second half fwd	SG	tactccgctcggaggacag	PUAS promoter
4734	PUAS promoter first half rev	SG	agtactgtcctccgagcgg	PUAS promoter
4733	GA_CYC1term_fwd	SG	cactctgtggtctcaggagGGCCGCAAATTAAAGCCTTCG	Digoxin receptor
4732	GA_CYC1promoter-SP4_rev	SG	taagaatagtaatacaggatccgaatcgtttcagttgcctTCATTTGGCGAGCGTTGGTTG	Digoxin receptor
4731	RL_target correction_rev	SG	ggatcggaggtctcaaggtccgcggtgcgggtgccagggcgtgcccttgag	RL target
4730	New_PB_rev	SG	aggtctcaaggtccgcggtgcgggtgccagggcgtgcccttgggctccccgggcgcgtactccacctctgttaatcagaaaaactcag	PB target
4729	AtAFB2 F col	Romi	CGCCATGGCTCAATGTAGAGAT	AtAFB2 colony PCR forward
4728	ZmIAA16 F col	Romi	CCTGGCCAGAAGAGGACG	ZmIAA16 colony PCR with 1475
4727	Set_16-Med21_G3_L3	HG	ATTATTGGTCTCGAAACCCACCCAATTCTACTTCAGTGTTCAATCACTACTTCGTCTCTAACCA
4726	Set_16-Med21_G2_L2	HG	ATATTATTGGTCTCAAGATTGTTTAAAATGGGCTTTTAAGGTGGGTTTTAGAGCTAGAAATAGC
4725	Set_16-Med21_G1_L1	HG	ATATATGGTCTCGATTGGACGCAGAGTCTGTTGGGTGTGGGTTTTAGAGCTAGAAATAGC
4724	Set_15-AIL6_G3_L3	HG	ATTATTGGTCTCGAAACCCTTTTCTGCACATTAGAACTTTCAATCACTACTTCGTCTCTAACCA
4723	Set_15-AIL6_G2_L2	HG	ATATTATTGGTCTCAAGATTGTATAATCTCAGGCTCAGCAAAGGGTTTTAGAGCTAGAAATAGC
4722	Set_15-AIL6_G1_L1	HG	ATATATGGTCTCGATTGTGTCACCAATGGAGATGTTGAGGGTTTTAGAGCTAGAAATAGC
4721	Set_14-NAC_G3_L3	HG	ATTATTGGTCTCGAAACCCGTGGCTGTTTGATGACCATTTCAATCACTACTTCGTCTCTAACCA
4720	Set_14-NAC_G2_L2	HG	ATATTATTGGTCTCAAGATTGGTCACTTCTTTCTTATTGGTTGGGTTTTAGAGCTAGAAATAGC
4719	Set_14-NAC_G1_L1	HG	ATATATGGTCTCGATTGTTTAGAAAGCAGAGAAGGTTTGGGTTTTAGAGCTAGAAATAGC
4718	Set_13-SMR11_G1_L2	HG	ATTATTGGTCTCGAAACTTTGCAGAGGGTAAAGGACGAGGAATCTCTTAGTCGACTCTAC3
4717	Set_12-SMR6_G3_L3	HG	ATTATTGGTCTCGAAACCCGCCTTTATATCCTTTTAGTGACAATCACTACTTCGTCTCTAACCA
4716	Set_12-SMR6_G2_L2	HG	ATATTATTGGTCTCAAGATTGCTCGCGGGAAAGTAAACTGGGGGGTTTTAGAGCTAGAAATAGC
4715	Set_12-SMR6_G1_L1	HG	ATATATGGTCTCGATTGTGGCGCCAAACAAAAGACGGTGGGTTTTAGAGCTAGAAATAGC
4714	pPP2AA3_btwn_R	EY	CAATCAAACACAAATGTACACAAAGTCAG	Between g50 and g125
4713	pPP2AA3_btwn_F	EY	CTGACTTTGTGTACATTTGTGTTTGATTG	Between g50 and g125
4712	pCI51_btwn_R	EY	CTGAAGCGTGAAGGCCACAAGAATG	Between g50 and g125
4711	pCI51_btwn_F	EY	CATTCTTGTGGCCTTCACGCTTCAG	Between g50 and g125
4710	pPUX10_btwn_R	EY	CTCACTCTTATCTCTCTAGAGAATC	Between g50 and g125
4709	pPUX10_btwn_F	EY	GATTCTCTAGAGAGATAAGAGTGAG	Between g50 and g125
4708	pUBQ1_btwn_R	EY	CAATGTACGCGTCTAGGGTTTTGC	Between g50 and g125
4707	pUBQ1_btwn_F	EY	GCAAAACCCTAGACGCGTACATTG	Between g50 and g125
4706	T3	SG	ATTAACCCTCACTAAAGGGA
4705	T7_rev	SG	GTAATACGACTCACTATAGGG
4704	ARF16_GA_insert_fwd	SG	ctcactatagggcttggagtgAACAACAAATACAAATGTATC
4703	ARF16_GA_V_rev	SG	GATACATTTGTATTTGTTGTTcactccaagccctatagtgag
4702	ARF7_GA_V_fwd	SG	CATGTAATACTCCTTAGTGGTTACACAaatgccaaagaagaagaggaaag
4701	ARF16_GA_insert_rev	SG	ctttcctcttcttctttggcattTGTGTAACCACTAAGGAGTATTACATG
4700		SG	cctcaccaaaactcaaatcctttg
4699	Sp3_f	SG	AAGGAACGGTTATTTCTGCGTAGATC
4698	Sp3_r	SG	TGCTGTGTAAGATAGATCTACGCAG
4697	Sp4_f	SG	AGGCAACTGAAACGATTCGGATC
4696	Sp4_r	SG	TAAGAATAGTAATACAGGATCCGAATCGTTTC
4695	2611-Monv2_F	ARL	cttacagtatctcgatgaatctAAGTTTAAAGAGACTGTTCAC	TPL Mutagenesis primer
4694	2611-Monv2_R	ARL	atcaagaaaacagactctctagcAAGAGAAGACGCATAATC	TPL Mutagenesis primer
4693	2611-L8S,F15Y_F	ARL	atcttacagtatCTCGATGAAGAGAAGTTTAAAG	TPL Mutagenesis primer
4692	2611-L8S,F15Y_R	ARL	caagaaaacagaCTCTCTACTAAGAGAAGAC	TPL Mutagenesis primer
4691	pUBQ10_ARF5_3xFLAG_F	EO	gatgatgataaagattataaagatgatgatgataaaTAAGCTTGCTCTCAAGATC	swapping out mVenus for 3xFLAG
4690	pUBQ10_ARF5_3xFLAG_R	EO	atctttataatctttatcatcatcatctttataatcGCCACCTGAAACAGAAGTC	swapping out mVenus for 3xFLAG
4689	N188-145-149-A_R	ARL	agagcagcCAACATGATCGCTCTTGC	TPL Mutagenesis primer
4688	N188-145-149-A_F	ARL	cgctgctCTGATTGAGGCGAATCCTTTATTC	TPL Mutagenesis primer
4687	N188-V145AE146A_R	ARL	GCTCTTGCAGACTTGGTG	TPL Mutagenesis primer
4686	N188-V145AE146A_F	ARL	GATCATGTTGgctgctCTCAAAAAGCTGATTGAGG	TPL Mutagenesis primer
4685	N188-K148AK149A_R	ARL	AACATGATCGCTCTTGCAG	TPL Mutagenesis primer
4684	N188-K148AK149A_F	ARL	GGTGGAACTCgctgctCTGATTGAGGCG	TPL Mutagenesis primer
4682	Correct_RLtarget_rev	SG	ggatcggaggtctcaaggtccgcggtgcg
4681	Q5_Muta_RKtoAA_R	EY	CCTGAGCCACTACCTGAT	Make COI1 insensitive Jaz9
4680	Q5_Muta_RKtoAA_F	EY	ATCTCAAGCTgcggcaGCATCCTTGGC	Make COI1 insensitive Jaz9
4679	Set11_ARF7_G1L1_F	MW	ATATATGGTCTCGATTGCAGTTTGCTAGTGAATATGTCGGGTTTTAGAGCTAGAAATAGC
4678	Set11_ARF19_G1L2_R	MW	ATTATTGGTCTCGAAACCCGCATGTATCCGATCCCAATCGAATCTCTTAGTCGACTCTAC
4677	TargetPB_fwd	SG	cactctgtggtctcactatagtag
4676	Correct_PBtarget_rev	SG	ggatcggaggtctcaaggtccgcggtgcg
4675	P_fwd	SG	cactctgtggtctcaggag
4674	Correct_P_GG1	SG	acgttgatggtctcacatTcctcaccaaaactcaaatcctttg
4673	NLS_tdTomato_F_(Short)	EY	GTAGTGGCAGTATGGTGAGCAAGGG
4672	pUBQ1_g50_F	EY	GCAAAGGTGATTAACTGCAAAGGGTTTCTACGTGAGAGAAGAC	Introduce guide site to pUBQ1
4671	pUBQ1_g50_R	EY	CCTTTGCAGTTAATCACCTTTGCCCTAAACAAGGAGGAGGCGG	Introduce guide site to pUBQ1
4670	pUBQ1_g125_F	EY	GCAAAGGTGATTAACTGCAAAGGGTAACCTAGCCCAATATTAG	Introduce guide site to pUBQ1
4669	pUBQ1_g125_R	EY	CCTTTGCAGTTAATCACCTTTGCAGGCCTTTACCACAAAAGGC	Introduce guide site to pUBQ1
4668	B42-ZmIAA16 F	Romi		Y2H interspecies Fboxes FIXED
4667	B42-ZmIAA16 R	Romi		Y2H interspecies Fboxes FIXED
4666	B42-ZmIAA12 F	Romi		Y2H interspecies Fboxes FIXED
4665	B42-ZmIAA12 R	Romi		Y2H interspecies Fboxes FIXED
4664	GILDA-ZmAFB2/3 b2 F	Romi	ttgtacaaaaaagctgaacgagaaATGACATACTTCCCGGGC	Y2H interspecies Fboxes FIXED
4663	GILDA-ZmAFB2/3 b2 R	Romi	TGGTCGACGGATCCCtcaCAGTATCTGTACAAAGTTAGGGGC	Y2H interspecies Fboxes FIXED
4662	GILDA-ZmAFB2/3 b1 F	Romi	ttgtacaaaaaagctgaacgagaaATGACGTATTTCCCAGAAGAAGTC	Y2H interspecies Fboxes FIXED
4661	GILDA-ZmAFB2/3 b1 R	Romi	TGGTCGACGGATCCCtcaGCTTTGCAGAATCTTAACGAAATTG	Y2H interspecies Fboxes FIXED
4660	GILDA_ZmAFB2/3 a F	Romi	ttgtacaaaaaagctgaacgagaaATGGCGTACTTTCCAGACGA	Y2H interspecies Fboxes FIXED
4659	GILDA_ZmAFB2/3 a R	Romi	TGGTCGACGGATCCCtcaTAGAATACTCACGAACCCAGGG	Y2H interspecies Fboxes FIXED
4658	GILDA-OsTIR1 F	Romi	ttgtacaaaaaagctgaacgagaaATGGGTAGAGGGGGGAGT	Y2H interspecies Fboxes FIXED
4657	GILDA-OsTIR1 R	Romi	TGGTCGACGGATCCCtcaTAGCCCGTGCATCTCCATA	Y2H interspecies Fboxes FIXED
4656	GILDA-OsAFB2 F	Romi	ttgtacaaaaaagctgaacgagaaATGACCTATTTCCCTGAGGAGG	Y2H interspecies Fboxes FIXED
4655	GILDA-OsAFB2 R	Romi	TGGTCGACGGATCCCtcaTAGAATTTTAACGAAATTTGGCGC	Y2H interspecies Fboxes FIXED
4654	pGILDA-GW F	Romi	GATCCGTCGACCATGGCGG	Y2H interspecies Fboxes FIXED
4653	pGILDA-GW R	Romi	TTCTCGTTCAGCTTTTTTGTACAA	Y2H interspecies Fboxes FIXED
4652	pB42 bb F	Romi	ACCCAGCTTTCTTGTACAAAGTGGT	Y2H pB42
4651	pB42 bb R	Romi	TTTGAAGCCTGCTTTTTTGTACAAACTTGT	Y2H pB42
4650	tOCS_R	EY	CTGCTTTAATGAGATATGCGAGACG	Last piece of the backbone
4649	NLS_tdTomato_F	EY	GTGGAAGCGGTAGTGGCAGTATGGTGAGCAAGGGCGAGGA	Swap Venus with tdtomato
4648	NLS_tdTomato_R	EY	TCCTCGCCCTTGCTCACCATACTGCCACTACCGCTTCCAC	Swap Venus with tdtomato
4647	(L1)_Pux10_F	EY	GGTTCTGGATCAGGTAGTGGCTCAGGATCTCTGCGAATTCATCAAATCAAGAAAC	link PUX10 with reporter vector of HACR
4646	(tOCS)_PUX10_F	EY	CGTCTCGCATATCTCATTAAAGCAGCTGCGAATTCATCAAATCAAGAAAC	link PUX10_g125 with pMOD backbone
4645	med21-bsaI-R	ARL	TTCGTGGTCTCAAAGCTTATTCAGGTTTCTTCATGTTCAGG	AtMED21-FLAG
4644	med21-bsaI-flag-R	ARL	TTCGTGGTCTCAAAGCTTATTTATCATCATCATCTTTATAATCTTCAGGTTTCTTCATGT	AtMED21-FLAG
4643	med21-bsaI-F	ARL	CACTCTGTGGTCTCAAATGGATATAATCTCACAGTTGCAAGAAC	AtMED21-FLAG
4642	ScMED21-2xFLAG_R	ARL	TTTATCATCATCATCTTTATAATCAGCACCACCACCACCAGA	yeast MED21-FLAG
4641	ScMED21-2xFLAG_F	ARL	GATTATAAAGATGATGATGATAAATAAGGCGCGCCACTTCTAAATAAG	yeast MED21-FLAG
4640	ScMED21-1xFLAG_R	ARL	ATCTTTATAATCAGCACCACCACCACCAGA	yeast MED21-FLAG
4639	ScMED21-1xFLAG_F	ARL	GATGATGATAAATAAGGCGCGCCACTTCTAAATAAG	yeast MED21-FLAG
4638	ARF19_Q5_N256A_R	MMTT	GCAGCTGCAAGTATCCCA	Q5 site specific mutagenesis
4637	ARF19_Q5_N256A_F	MMTT	AGCTCATGCTgctGCCAATAGTAGCC	Q5 site specific mutagenesis
4636	ZmARF35_Rnew	MMTT	TCATTCAAACTGGTCATATGAACCAGTAGATGGG	ZmARF35 amplification, no overhangs
4635	ZmARF35_F	MMTT	ATGATCAAGCAGCAGCAG	ZmARF35 amplification, no overhangs
4634	ZmARF35_pDONROH_R	MMTT	AGAAAGCTGGGTGTCATTCAAACTGGTCATATGAAC	Adds Kozak sequence and partial att sites for gateway cloning
4633	ZmARF35_pDONROH_Fnew	MMTT	AAAAAGCAGGCTTCAAAATGATCAAGCAGCAG	Adds Kozak sequence and partial att sites for gateway cloning
4632	ZmARF34_pDONROH_R	MMTT	AGAAAGCTGGGTGTCAGTAGTCCAGAGGCACCACA	Adds Kozak sequence and partial att sites for gateway cloning
4631	ZmARF34_pDONROH_F	MMTT	AAAAAGCAGGCTTCAAAATGAACCTCTCCCCGCCCAAGAT	Adds Kozak sequence and partial att sites for gateway cloning
4630	ZmARF18_pDONROH_R	MMTT	AGAAAGCTGGGTGtcatcccaactcgaccgaa	Adds Kozak sequence and partial att sites for gateway cloning
4629	ZmARF18_pDONROH_F	MMTT	AAAAAGCAGGCTTCAAAatgaggctctcgtcgtcgt	Adds Kozak sequence and partial att sites for gateway cloning
4628	ZmARF16_pDONROH_R	MMTT	AGAAAGCTGGGTGTCAGAACTCGACCGAACCCA	Adds Kozak sequence and partial att sites for gateway cloning
4627	ZmARF16_pDONROH_F	MMTT	AAAAAGCAGGCTTCAAAATGAAGCTCTCGCCGTCG	Adds Kozak sequence and partial att sites for gateway cloning
4626	pUBQ10_ARF7_2xHA_Fw	EO	tatccgtatgatgtgccggattatgcgTAAGCTTGAGCTTTCGTTCGTATC	Swapping out mRFP for 2xHA
4625	pUBQ10_ARF7_2xHA_Rv	EO	cgcataatccggcacatcatacggataGCCACCCCGGTTAAACGA	Swapping out mRFP for 2xHA
4624	Venus-Seq-F	EY	CGTAAACGGCCACAAGTTCAGCGTG	Swapping out pUBQ1*
4623	pUBQ1_Beginning_R	EY	GAAATATCCCGGGATATTACAAAAT	Swapping out pUBQ1*
4622	pUBQ1_Beginning_F	EY	ATTTTGTAATATCCCGGGATATTTC	Swapping out pUBQ1*
4621	delIAA14_2502_F	ARL	TAAGCTTGAGCTTTCGTTC	UAS TPL-IAA14 cloning
4620	delIAA14_2502_R	ARL	ATTTTTACAAAGCTGGTGTTG	UAS TPL-IAA14 cloning
4619	delTPL_2502_F	ARL	ATGAACCTTAAGGAGACG	UAS TPL-IAA14 cloning
4618	delTPL_2502_R	ARL	AGAAGACGCATAATCCGG	UAS TPL-IAA14 cloning
4615	DR5_ecor1_Venus_F	HG	AATATGCCAAAGAAGAAGAGGAAAGTCGGAAGTGGTAGTGGT	DR5_venus_Cloning_into_dCas9act.rep
4614	DR5_ecor1_Venus_R	HG	GCTGACGCGCCCTGACGGGCTTGAATTCCATTTGTTTGTCTTTAACAACGGCTCA	DR5_venus_Cloning_into_dCas9act.rep
4613	ZmIAA16_gib_F	Romi	agtggatccatcacaaaatgGGAGACGCAGCAGA	ZmIAA gibs
4612	ZmIAA16_gib_R	Romi	taactaattacatgacagaaTCAAGAGGTAAACACTGGACA	ZmIAA gibs
4611	B42-Zm16 F	Romi		PCR Y2H
4610	B42-Zm16 R	Romi		PCR Y2H
4609	B42-Zm12 F	Romi		PCR Y2H
4608	B42-Zm12 R	Romi		PCR Y2H
4607	GILDA-Zmb2 F	Romi	gtacaaaaaagcaggcttcaaaATGACATACTTCCCGGGC	PCR Y2H
4606	GILDA-Zmb2 R	Romi	ttgtacaagaaagctgggttttaCAGTATCTGTACAAAGTTAGGGGC	PCR Y2H
4605	GILDA-Zmb1 F	Romi	gtacaaaaaagcaggcttcaaaATGACGTATTTCCCAGAAGAAGTC	PCR Y2H
4604	GILDA-Zmb1 R	Romi	ttgtacaagaaagctgggttttaGCTTTGCAGAATCTTAACGAAATTG	PCR Y2H
4603	GILDA-Zma F	Romi	gtacaaaaaagcaggcttcaaaATGGCGTACTTTCCAGACGA	PCR Y2H
4602	GILDA-Zma R	Romi	ttgtacaagaaagctgggttttaTAGAATACTCACGAACCCAGGG	PCR Y2H
4601	GILDA-OsT F	Romi	gtacaaaaaagcaggcttcaaaATGGGTAGAGGGGGGAGT	PCR Y2H
4600	GILDA-OsT R	Romi	ttgtacaagaaagctgggttttaTAGCCCGTGCATCTCCATA	PCR Y2H
4599	GILDA-OsA F	Romi	gtacaaaaaagcaggcttcaaaATGACCTATTTCCCTGAGGAGG	PCR Y2H
4598	GILDA-OsA R	Romi	ttgtacaagaaagctgggttttaTAGAATTTTAACGAAATTTGGCGC	PCR Y2H
4597	pGILDA-F	Romi	TAAAACCCAGCTTTCTTGTACAAA	PCR Y2H
4596	pGILDA-R	Romi	TTTGAAGCCTGCTTTTTTGTAC	PCR Y2H
4595	pB42-AD F	Romi	TAACACCCAGCTTTCTTGTAC	PCR Y2H
4594	pB42-AD R	Romi	TTTGAAGCCTGCTTTTTTGTAC	PCR Y2H
4593	mTURQ_Mid_Seq_R	EY	atgcggttcaccagggtgtcg	Sequencing the beginning of mTURQ
4592	Set4_Orth1_G1_L1_F	MW	ATATATGGTCTCGATTGTCGATAAGATCGTGACAGAATGGGTTTTAGAGCTAGAAATAGC
4591	Set4_Orth1_G2_L2_F	MW	ATATTATTGGTCTCAAGATTGTATGACAAAGACGTGATTAGTGGGTTTTAGAGCTAGAAATAGC
4590	Set4_Orth1_G3_L3_R	MW	ATTATTGGTCTCGAAACCCACCACTAATCACGTCTTTGTCCAATCACTACTTCGTCTCTAACCA
4589	Set5_OFP8_G1_L1_F	MW	ATATATGGTCTCGATTGTCGAGAGAGACTAATGAAGATGGGTTTTAGAGCTAGAAATAGC
4588	Set5_OFP8_G2_L2_F	MW	ATATTATTGGTCTCAAGATTGGATATAAGACTTTTGAGGGAAGGGTTTTAGAGCTAGAAATAGC
4587	Set5_OFP8_G3_L3_R	MW	ATTATTGGTCTCGAAACCCCTCAAAAGTCTTATATCACACCAATCACTACTTCGTCTCTAACCA
4586	Set6_LRP1_G1_L1_F	MW	ATATATGGTCTCGATTGTCAGATTGTTAGATAGAGAGAGGGTTTTAGAGCTAGAAATAGC
4585	Set6_LRP1_G2_L2_F	MW	ATATTATTGGTCTCAAGATTGCTATCTCTGCTCACACGCAGTGGGTTTTAGAGCTAGAAATAGC
4584	Set6_LRP1_G3_L3_R	MW	ATTATTGGTCTCGAAACCCTTCTCTTAACAACTGATCTTTCAATCACTACTTCGTCTCTAACCA
4583	Set7_BRXL1_G1_L1_F	MW	ATATATGGTCTCGATTGACCGTGAGTAATTTATAAGGTGGGTTTTAGAGCTAGAAATAGC
4582	Set7_BRXL4_G1_L2_R	MW	ATTATTGGTCTCGAAACCCGCGTCTCACTACGGTAATTACAATCTCTTAGTCGACTCTAC
4581	Set8_NRP1_G1_L1_F	MW	ATATATGGTCTCGATTGTACGTCACGTTACAGAAGAAGGGGTTTTAGAGCTAGAAATAGC
4580	Set8_NRP2_G1_L2_R	MW	ATTATTGGTCTCGAAACCCCTAAGTTCCCTTTTGCCCACTAATCTCTTAGTCGACTCTAC
4579	Set9/10_Rack1b_G1_L1_F	MW	ATATATGGTCTCGATTGAGAATACCGGGCCTTAATGCTGGGTTTTAGAGCTAGAAATAGC
4578	Set9_Rack1c_G1_L2_R	MW	ATTATTGGTCTCGAAACCCTCGCAGAAACCACACTAAACCAATCTCTTAGTCGACTCTAC
4577	Set10_Rack1c_G1_L2_F	MW	ATATTATTGGTCTCAAGATTGGGTTTAGTGTGGTTTCTGCGAGGGTTTTAGAGCTAGAAATAGC
4576	Set10_Rack1a_G1_L3_R	MW	ATTATTGGTCTCGAAACCCATGTGTAAGAAAGCGTGTTCTCAATCACTACTTCGTCTCTAACCA
4575	mTURQ_Mid_Seq_F	EY	cgacaccctggtgaaccgcat	Sequence the end of mTURQ
4574	BEH4 mRFP to BEH4 2x HA Rv		cgcataatccggcacatcatacggataGCCACCCCTGGTGCTTGA
4573	BEH4 mRFP to BEH4 2x HA Fw		tatccgtatgatgtgccggattatgcgTAAGCTTGAGCTTTCGTTCGTATCATC
4572	ARF19 mRFP to ARF19 2x HA Rv		cgcataatccggcacatcatacggataGCCACCTCTGTTGAAAGAAG
4571	ARF19 mRFP to ARF19 2x HA Fw		tatccgtatgatgtgccggattatgcgTAAGCTTGAGCTTTCGTTC
4570	AtMED21_Del3_F	ARL	ATCTCACAGTTGCAAGAAC	AtMED21 cytoSUS Mutagenesis
4569	AtMED21_Del5_F	ARL	CAGTTGCAAGAACAAGTG	AtMED21 cytoSUS Mutagenesis
4556	pURA3_geno_F	ARL	ACACCAGAGTCAAACGACGT	SLARC cloning
4555	pURA3_geno_R	ARL	GTCATTAGTGGCGAACCCGA	SLARC cloning
4554	pURAF	ARL	GATTCGGTAATCTCCGAGCAGAAGGAAG	SLARC cloning
4553	ttURAR	ARL	CGGCCCAAGCCTTGTCCCA	SLARC cloning
4552	mRFP_seq_Rv		cttgaagccctcggggaagg
4551	AGL42_seq_2_Fw		gggttaatggatctagattcaattatttg
4550	AGL42_seq_1_Fw		gaaattctctactaaatttttattaaatc
4549	Set1_HD2B_G1_L1_F	MW	ATATATGGTCTCGATTGGGGTTCTTCGAGAGTCTACACGGGTTTTAGAGCTAGAAATAGC
4548	Set1_HDA3_G1_L2_F	MW	ATATTATTGGTCTCAAGATTGCTCCGATCAAATTCAAACGGCGGGTTTTAGAGCTAGAAATAGC
4547	Set1_HDT4_G1_L3_R	MW	ATTATTGGTCTCGAAACCCATGTCATAAGAGTTGCCTATGCAATCACTACTTCGTCTCTAACCA
4546	Set2_HD2B_G2_L1_F	MW	ATATATGGTCTCGATTGGAGGTTTAAGAAGTCTCTTTAGGGTTTTAGAGCTAGAAATAGC
4545	Set2_HDA3_G2_L2_F	MW	ATATTATTGGTCTCAAGATTGCTTCACGATTGATGCAGCCATGGGTTTTAGAGCTAGAAATAGC
4544	Set2_HDT4_G2_L3_R	MW	ATTATTGGTCTCGAAACCCTACCTGTGAAAAGGAAGTTTACAATCACTACTTCGTCTCTAACCA
4543	Set3_TMO6_G1_L1_F	MW	ATATATGGTCTCGATTGACATGGGATGGGAATGTGGGAGGGTTTTAGAGCTAGAAATAGC
4542	Set3_TMO6_G2_L2_F	MW	ATATTATTGGTCTCAAGATTGAACCAATTCGGAACGTGACTTGGGTTTTAGAGCTAGAAATAGC
4541	Set3_TMO6_G3_L3_R	MW	ATTATTGGTCTCGAAACCCACAGGCTATCAAATGTAGATTCAATCACTACTTCGTCTCTAACCA
4540	TMO6_rev	SG	GTTGAGTTGCAAACTTGCAATC	TMO6 check
4539	TMO6_fwd	SG	CACAAGTAGGTAGGGTCCAAAG	TMO6 check
4538	PP2AA3_g125_R2	EY	CCTTTGCAGTTAATCACCTTTGCCATAGACACCATCAATACAAAAGACG	Introduce guide site in PP2AA3 (previous primers are off)
4537	PP2AA3_g125_F2	EY	GCAAAGGTGATTAACTGCAAAGGTATGCATTGTGTTTTATTCTGAC	Introduce guide site in PP2AA3 (previous primers are off)
4536	PP2AA3_g50_R2	EY	CCTTTGCAGTTAATCACCTTTGCCACTCCCTACCTTCAATCAAACACAAATG	Introduce guide site in PP2AA3 (previous primers are off)
4535	PP2AA3_g50_F2	EY	GCAAAGGTGATTAACTGCAAAGGATTTGAGTTTTGGTGAGGATGCCAAAG	Introduce guide site in PP2AA3 (previous primers are off)
4534	deltaPB1_F	Romi	CTTCCAGCAGCAGGC	colony PCR on deltaPB1 with 4316
4533	Q5_GSlinker_mTURQ_R	EY	ACTGCCACTACCGCTTCC	Re-introduce the A in the start codon
4532	Q5_GSlinker_mTURQ_F	EY	aTGGTGAGCAAGGGCGAGG	Re-introduce the A in the start codon
4531	ARF5 sYFP to 2xFLAG mutagenesis Rv	al	tttatcatcatcatctttataatcGCCACCTGAAACAGAAGTC
4530	ARF5 sYFP to 2xFLAG mutagenesis Fw	al	gattataaagatgatgatgataaaTAAGCTTGCTCTCAAGATC
4529	Venus-G12 rev	SG	ACGTTGATGGTCTCACTGCCAGATCCAGATCCTGATCCTGAGCCACTGCCGTACAGCTCGTCCATGCCG	Integase cassette
4528	ARF5 mRFP to 2xHA mutagenesis Rv	al	cgcataatccggcacatcatacggataGCCACCTGAAACAGAAGTC
4527	ARF5 mRFP to 2xHA mutagenesis Fw	al	tatccgtatgatgtgccggattatgcgTAAGAGCTTTCGTTCGTATC
4526	AGL42 genotyping alt mid Rv 2	al	gatcaaaaatagacatatattttcagaaatatg	AGL42 CRISPR genotyping
4525	AGL42 genotyping alt mid Rv 1	al	cgtatttgttttatctatagctctactatatttg	AGL42 CRISPR genotyping
4524	AGL42 genotyping alt Rv 2	al	cagaaaatactatcccaaatcattac	AGL42 CRISPR genotyping
4523	AGL42 genotyping alt Rv 1	al	gaatatttcatgataaataaataaacatattatataatg	AGL42 CRISPR genotyping
4522	AGL42 genotyping alt Fw 2	al	gtagtatttaattaccattttattgaaatttg	AGL42 CRISPR genotyping
4521	AGL42 genotyping alt Fw 1	al	ccatatattggtatatacacacatttttg	AGL42 CRISPR genotyping
4520	AGL42 genotyping internal Rv primer	al	gtcataaaagagagagagagatctcac	AGL42 CRISPR genotyping
4519	RBSC1A_internal_R	EY	CCTTTTCCGTTGCAATGATATTG	Sequence RBSC1A which is looong
4518	RBSC1A_internal_F	EY	CAATATCATTGCAACGGAAAAGG	Sequence RBSC1A which is looong
4517	TIR1_R_exon1	AK	GATAGCAGCGAGACCATCGG	Genotyping tir1-10 tDNA mutant (paired with 4000)
4516	CI51_g125_R	EY	CCTTTGCAGTTAATCACCTTTGCCGAAGTTATAATCACTGCCCACCTG	Introduce g125 guide site in CI51
4515	CI51_g125_F	EY	GCAAAGGTGATTAACTGCAAAGGTCTCCGTGTCTGTTCAAGCTCCC	Introduce g125 guide site in CI51
4514	CI51_g50_R	EY	CCTTTGCAGTTAATCACCTTTGCGTAGTCTTTCAGAGAGATACTGGTC	Introduce g50 guide site in CI51
4513	CI51_g50_F	EY	GCAAAGGTGATTAACTGCAAAGGTTCTCGGAAATTTTCGTCTCCATG	Introduce g50 guide site in CI51
4512	TargetPB_fwd	SG	cactctgtggtctcactatagtagtgccccaactggggtaacctttgagttctctcagttgggggcgtagggctcaacaacaaactttccattcaccc	PB target PhiC31
4511	TargetPB_REV	SG	ggatcggaggtctcaggtccgcggtgcgggtgccagggcgtgcccttgggctccccgggcgcgtactccacctctgttaatcagaaaaactcag	PB target PhiC31
4510	pLOM insert fwd	SG	caatacgcaaaccgcctc	pLOM Level0 gibson
4509	pLOM plasmid rev	SG	gagaccacagagtgattaatgaatc	pLOM Level0 gibson
4508	pLOM plasmid fwd	SG	gagaccacgaagtggctc	pLOM Level0 gibson
4507	pLOM insert rev	SG	cacgaggccctttcgtc	pLOM Level0 gibson
4506	twistLR2_fwd	SG	gtatcaagttggtgaacaagtctc	LR target gibson
4505	twistLR1_rev	SG	gagtcaccaaaccacttgc	LR target gibson
4504	TwistLR2insert_rev	SG	cacgaggccctttcgtccactgaagagccacttcgtggtctcaggtc	LR target gibson
4503	pUBQ10rev	SG	cacaacaccgtcgggacag	pUBQ10-rev
4502	pUBQ10fwd	SG	gcttcaccgccttagctttctc	pUBQ10-fwd
4501	PhiC31_rev	SG	ctcactcacgagttcgaaacc	PhiC31-rev
4500	PhiC31_fwd	SG	cttctgctccaggacagcatg	PhiC31-fwd
4499	SAUER_fwd	SG	gattgttagctaatttcccctggag	SAUERdegron-rev
4498	SAUER_rev	SG	catgcaaatacgcattgatcaattacg	SAUERdegron-fwd
4497	ER_rev	SG	caagccaagcacattcaagaag	ER-rev
4496	ER_fwd	SG	ctaaggctggacttactcttcaac	ER-fwd
4495	Venus_fwd	SG	gttcgagggcgacaccc	Venus-rev
4494	Venus_rev	SG	cagctcgatgcggttcac	Venus-fwd
4493	Ub_fwd	SG	gcaaatcttcgttaaaactctgacg	Ub-rev
4492	Ub_rev	SG	cgcagacgtaagactagatgcag	Ub-fwd
4491	tRBSC-mScarlet_target_fwd	SG	cactctgtggtctcaggagcgattgatgcatgttgtcaatcaattgg	Target PhiC31
4490	tRBSC-mScarlet_Target_rev	SG	acgttgatggtctcaatagtaaacaatgccaaagaagaagaggaaagtcg	Target PhiC31
4489	Venus GG1 fwd	SG	ggatcggaggtctcaaatggtgagcaagggcgaggag	Venus level0
4488	Venus-GS12-GG3 rev	SG	acgttgatggtctcactgccagatccagatcctgatcc	Venus level0
4487	Venus GG2 fwd	SG	cactctgtggtctcaagccgtgagcaagggcgaggag	Venus level0
4486	Venus-GS12-NLS-stop GG4 rev	SG	cgtgatgaggtctcaaagcttattagactttcctcttcttctttgg	Venus level0
4485	Venus-stop-GG4 rev	SG	cgtgatgaggtctcaaagcttattagtacagctcgtccatgccg	Venus level0
4484	PhiC31 GG1 fwd	SG	ggatcggaggtctcaaatggacacgtatgccggcg	PhiC31 level0
4483	PhiC31 GG2 fwd	SG	cactctgtggtctcaagccgacacgtatgccggcgc	PhiC31 level0
4482	PhiC31-GS12-GG3 rev	SG	acgttgatggtctcactgccagatccagatcctgatcctgagccactgcctgctgccacatcctcggtac	PhiC31 level0
4481	PhiC31-NLS-stop-GG4 rev	SG	cgtgatgaggtctcaaagcttacaccttcctctttttttttggtgctg	PhiC31 level0
4480	PhiC31-stop-GG4 rev	SG	cgtgatgaggtctcaaagcttattatgctgccacatcctcggtac	PhiC31 level0
4479	tUBQ1 GG5 fwd	SG	cactctgtggtctcaggtaagagactcttatcaagaatcccatctcttg	tUBQ1 level0
4478	tUBQ1 GG4 fwd	SG	cactctgtggtctcagcttagagactcttatcaagaatcccatctcttg	tUBQ1 level0
4477	tUBQ1 GG6 rev	SG	ggatcggaggtctcaagcgcatttgtttgtctttaacaacggctc	tUBQ1 level0
4476	pPP2AA3 GG0 fwd	SG	cactctgtggtctcaggaggaggaagaagaagagagttactgagaag	pPP2AA3 level0
4475	pPP2AA3 GG1 rev	SG	acgttgatggtctcatcctcaccaaaactcaaatcctttgc	pPP2AA3 level0
4474	Med21_pnx32_Del7F	ARL	CAAGAACAAGTGAATACG	for deleting MED21 N-term fragments (has ATG)
4473	MED21_pnx32_delR	ARL	CATAGCTTTTTTGTACAAAC	for deleting MED21 N-term fragments (has ATG)
4472	GALZ4_MED21Dels_R	ARL	CATTTTGTAGATCCACTAGTTC	for deleting MED21 N-term fragments (has ATG)
4471	Generic-tUBQ1-F	EY	AGAGACTCTTATCAAGAATCCCATCTCTTG	Clone out backbone
4470	(NLS)-mTURQ(fromArjun)-F	EY	GGTAGTGGAAGCGGTAGTGGCAGTATGGTGAGCAAGGGCGAGGAGCTG	Clone Arjun's mTURQ into promoter vectors
4469	(tUBQ1)-mTURQ(fromArjun)-R	EY	GATGGGATTCTTGATAAGAGTCTCTTTACTTGTACAGCTCGTCCATGCCGAG	Clone Arjun's mTURQ into promoter vectors
4468	mTURQ_internal_R	EY	GGTACAAATGAATTTCAAGGTCAAC	Confirm Sequence of Pre-mTURQ connections
4467	FANESI_internal_R	EY	GATATCTTTAGACTCTGTAAGGG	Confirm Sequence of FANESI
4466	FANESI_internal_F	EY	CCTCACCACAAGTCACTAGC	Confirm Sequence of FANESI
4465		Romi
4464	TPL_S138A_F	ARL	GGACACCAAGgctGCAAGAGCGA	TPL Mutagenesis primer
4463	TPL_S138A_R	ARL	CCATACTTGGATAACTGTTCATTCTCCC	TPL Mutagenesis primer
4462	TPL_R140A_F	ARL	CAAGTCTGCAgctGCGATCATGTTGG	TPL Mutagenesis primer
4461	TPL_R140A_R	ARL	GTGTCCCCATACTTGGATAAC	TPL Mutagenesis primer
4460	TPL_S142A_F	ARL	TGCAAGAGCGgctATGTTGGTGG	TPL Mutagenesis primer
4459	TPL_S142A_R	ARL	GACTTGGTGTCCCCATAC	TPL Mutagenesis primer
4458	TPL_V145A_F	ARL	GATCATGTTGgctGAACTCAAAAAGCTG	TPL Mutagenesis primer
4457	TPL_V145A_R	ARL	GCTCTTGCAGACTTGGTG	TPL Mutagenesis primer
4456	TPL_E146A_F	ARL	CATGTTGGTGgctCTCAAAAAGCTG	TPL Mutagenesis primer
4455	TPL_E146A_R	ARL	ATCGCTCTTGCAGACTTG	TPL Mutagenesis primer
4454	TPL_K148A_F	ARL	GGTGGAACTCgctAAGCTGATTGAGG	TPL Mutagenesis primer
4453	TPL_K148A_R	ARL	AACATGATCGCTCTTGCAG	TPL Mutagenesis primer
4452	TPL_K149A_F	ARL	GGAACTCAAAgctCTGATTGAGGCGG	TPL Mutagenesis primer
4451	TPL_K149A_R	ARL	ACCAACATGATCGCTCTTG	TPL Mutagenesis primer
4450	TPL_E152A_F	ARL	AAAGCTGATTgctGCGGGGAGAG	TPL Mutagenesis primer
4449	TPL_E152A_R	ARL	TTGAGTTCCACCAACATG	TPL Mutagenesis primer
4448	TPL_L8S_F	ARL	GTCTTCTCTTgctAGAGAGTCTGTTTTCTTG	TPL Mutagenesis primer
4447	TPL_L8S_R	ARL	ATCATTTTGTGATGGATCC	TPL Mutagenesis primer
4438	pARF16_rev	SG	cacttcgtggtctcacattATTTTTTGTGACCGTTTTTGCTGC	Promoter amplification
4437	pARF16_fwd	SG	cactctgtggtctcaggagtgGTGTAACCACTAAGGAGTATTACATGC	Promoter amplification
4436	pWOX7_rev	SG	cacttcgtggtctcacatTATTAATTTCAAGAAATAGTTATCTTAGTGTTTG	Promoter amplification
4435	pWOX7_fwd	SG	cactctgtggtctcaggagtgCACATACACGACATTGACCTAGG	Promoter amplification
4434	pLRP1_rev2	SG	cacttcgtggtctcacattTCGAAGAAGGTAGGCCGTAAC	Promoter amplification
4433	pLRP1_rev1	SG	cacttcgtggtctcacattTCTCCGTCGCCGCCGC	Promoter amplification
4432	pLRP1_fwd	SG	cactctgtggtctcaggagtgCTCTTCATATTGATCAGACGGGAATC	Promoter amplification
4431	pOFP8_rev	SG	cacttcgtggtctcacattGTTTAGAGAATATCGAGAGAGACTAATGAAG	Promoter amplification
4430	pOFP8_fwd	SG	cactctgtggtctcaggagtgCATTTCTTCAACATGTTGAAAGAAACG	Promoter amplification
4429	pORTHI1_rev	SG	cacttcgtggtctcacatTGTTGAAACGAGTGAGAGAGAGATTTAG	Promoter amplification
4428	pORTHI1_fwd	SG	cactctgtggtctcaggagtgGACTTTCTCAACAATATACCGAAACATC	Promoter amplification
4427	pBRXL1_rev	SG	cacttcgtggtctcacattCTTTGCACTCTTTTTTATGTTCTCTGC	Promoter amplification
4426	pBRXL1long_fwd	SG	cactctgtggtctcaggagtgGAAGGTCTGTGGTTTAGCTCTTC	Promoter amplification
4425	pBRXL1_fwd	SG	cactctgtggtctcaggagtgCCGTAACACGACCCGTTTG	Promoter amplification
4424	pTMO6long_rev	SG	cacttcgtggtctcacattAAGAGCTGAATCTGAG	Promoter amplification
4423	pTMO6long_fwd	SG	cactctgtggtctcaggagtgGCATTAGGTCGAATAGG	Promoter amplification
4422	NLS-tdTomato_GG_R	SG	cacttcgtggtctcaaagcttaCTTGTACAGCTCGTCCATG	Golden gate compatible
4421	NLS-tdTomato_GG_F	SG	cactctgtggtctcaggtggcatgccaaagaagaagaggaaagtc	Golden gate compatible
4420	ScMED21_Del2-7_F	ARL	TTGCAGATATGTTTAGACC	ScMED21 N-terminal deletions
4419	ScMED21_Del2-7_R	ARL	CATTGTTAAAGAGCATATAATG	ScMED21 N-terminal deletions
4418	ScMED21_Del2-5_F	ARL	ACACAATTGCAGATATGTTTAG	ScMED21 N-terminal deletions
4417	ScMED21_Del2-5_R	ARL	CATTGTTAAAGAGCATATAATG	ScMED21 N-terminal deletions
4416	ScMED21_Del2-3_F	ARL	AGATTAACACAATTGCAGATATG	ScMED21 N-terminal deletions
4415	ScMED21_Del2-3_R	ARL	CATTGTTAAAGAGCATATAATG	ScMED21 N-terminal deletions
4414	CYC8_F	ARL	CCCGCGTACTGTACTCCATC	Amplify CYC8 from yeast for AA
4413	CYC8_R	ARL	TCCACCGTAGAACCCAAAGC	Amplify CYC8 from yeast for AA
4412	pXN21_col_R_2	Romi	GGATCCTGCATAGTCCG
4411	ZmIAA8ΔPB1_gib_R	Romi	taactaattacatgacagaaTCACAACCCGCCGG
4410	PP2AA3_g125_R	EY	CCTTTGCAGTTAATCACCTTTGCGCATACATAGACACCATCAATAC
4409	PP2AA3_g125_F	EY	GCAAAGGTGATTAACTGCAAAGGATTGTGTTTTATTCTGACTTTG
4408	PP2AA3_g50_R	EY	CCTTTGCAGTTAATCACCTTTGCCCTACCTTCAATCAAACACAAATG
4407	PP2AA3_g50_F	EY	GCAAAGGTGATTAACTGCAAAGGGAGTGATTTGAGTTTTGGTG
4406	OsTIR1_col_F	Romi	AGATTATGAATGACCCTGGAAG
4405	pMetOYC_col_R	Romi	GATCTGTGCATACCACCTC
4404	pXN21_col_R	Romi	TCCAATGTTCCGGTTTTACC
4403	pNX32_col_R	Romi	GCATAGTCCGGGACGT
4402	pFLP_fwd2	SG	cactctgtggtctcaggagtgCATCCACTGCTCATAAAATGTGATATGTC	Amplify Promter regions
4401	pHDT4_fwd2	SG	cactctgtggtctcaggagtgGGACCTCTAATAATAGAACTTTTGCATTCTG	Amplify Promter regions
4400	pHD2B_fwd2	SG	cactctgtggtctcaggagtgCATATGATTTAGAGAATGAGAATCGAATAATC	Amplify Promter regions
4399	pHDA3_fwd2	SG	cactctgtggtctcaggagtgTTTGTCGAAATCAGCAGCTCCATG	Amplify Promter regions
4398	pRACK1B_fwd2	SG	cactctgtggtctcaggagtgTCTATTTCAATTTTTGACAATAACTTCTCG	Amplify Promter regions
4397	pRACK1C_fwd2	SG	cactctgtggtctcaggagtgCCTTAATAAGAATCAAAGCTAAATTATGAACAAACTAC	Amplify Promter regions
4396	pNRP2_fwd2	SG	cactctgtggtctcaggagtgCACTAGCTAACCAGTCACAC	Amplify Promter regions
4395	pNRP1_fwd2	SG	cactctgtggtctcaggagtgGCACGGTTTGTTTCACCTTCATG	Amplify Promter regions
4394	pAIL6_fwd2	SG	cactctgtggtctcaggagtgCCCTTTATCACTAAATCATATTAGCATAG	Amplify Promter regions
4393	pROC2_fwd2	SG	cactctgtggtctcaggagtgCTAGATGTTAAAATGAGTAATCGGTTC	Amplify Promter regions
4392	pTMO6_fwd2	SG	cactctgtggtctcaggagtgCTCTAGCTACTTCCATTGTCACATTAAC	Amplify Promter regions
4391	rbcst pGREEN overlap Rv	AL	CACCGCGGTGGCGGCCGCtcgattgatgcatgttgtcaatcaattg	Gibson construction of AGL42 reporter
4390	rbcst no overlap Fw	AL	gagctttcgttcgtatcatcggtttcg	Gibson construction of AGL42 reporter
4389	Rv Act2 w/ pGREEN overlap	AL	ggagctccaccgcggtggcggccgcaaatggtgcgatcttaaaatatctgactttgtgc	Gibson construction of AGL42 reporter
4388	mEGFP rbcst overlap Rv	AL	gaaaccgatgatacgaacgaaagctcaagcttacttgtacagctcgtccatgccg	Gibson construction of AGL42 reporter
4387	mEGFP no overlap Fw	AL	gcatggtgagcaagggcgagg	Gibson construction of AGL42 reporter
4386	AGL42 Rv w/ mEGFP overhang	AL	cctcgcccttgctcaccatgccaccGCAGTTTCTATTTGGCAAACCG	Gibson construction of AGL42 reporter
4385	pTMO6_rev	SG	cacttcgtggtctcacattTAAGAGCTGAATCTGAGAAGTTGCTTG	Amplify Promter regions
4384	pTMO6_fwd	SG	CATCCACTGCTCATAAAATGTGCTCTAGCTACTTCCATTGTCACATTAAC	Amplify Promter regions
4383	pROC2_rev	SG	cacttcgtggtctcacattTTACTCTGTCAATTACAAAGATATGAATC	Amplify Promter regions
4382	pROC2_fwd	SG	CATCCACTGCTCATAAAATGTGCTAGATGTTAAAATGAGTAATCGGTTC	Amplify Promter regions
4381	pAIL6_rev	SG	cacttcgtggtctcacattTAAACTTTCTTATAAAAACAATTTTACTTTTTCTCTC	Amplify Promter regions
4380	pAIL6_fwd	SG	CATCCACTGCTCATAAAATGTGCCCTTTATCACTAAATCATATTAGCATAG	Amplify Promter regions
4379	pNRP1_rev	SG	cacttcgtggtctcacattTTCAGTTCACTTCCTTTGAGGAAAC	Amplify Promter regions
4378	pNRP1_fwd	SG	CATCCACTGCTCATAAAATGTGGCACGGTTTGTTTCACCTTCATG	Amplify Promter regions
4377	pNRP2_rev	SG	cacttcgtggtctcacattTTCGATTCCAATTGAGAAAACCCTAATTG	Amplify Promter regions
4376	pNRP2_fwd	SG	CATCCACTGCTCATAAAATGTGCACTAGCTAACCAGTCACAC	Amplify Promter regions
4375	pRACK1C_rev	SG	cacttcgtggtctcacattTGGTTTGAGGTTTTCGGGTTTCTTC	Amplify Promter regions
4374	pRACK1C_fwd	SG	CATCCACTGCTCATAAAATGTGCCTTAATAAGAATCAAAGCTAAATTATGAACAAACTAC	Amplify Promter regions
4373	pRACK1B_rev	SG	cacttcgtggtctcacattTGGTTCAGGGTTTGAGGTC	Amplify Promter regions
4372	pRACK1B_fwd	SG	CATCCACTGCTCATAAAATGTGTCTATTTCAATTTTTGACAATAACTTCTCG	Amplify Promter regions
4371	pHDA3_rev	SG	cacttcgtggtctcacattTGGCTAAGAATCAAGGTTGAGAAAAAGAG	Amplify Promter regions
4370	pHDA3_fwd	SG	CATCCACTGCTCATAAAATGTGTTTGTCGAAATCAGCAGCTCCATG	Amplify Promter regions
4369	pHD2B_rev	SG	cacttcgtggtctcacattTGTTGTTGAACGAGGAAGAG	Amplify Promter regions
4368	pHD2B_fwd	SG	CATCCACTGCTCATAAAATGTGCATATGATTTAGAGAATGAGAATCGAATAATC	Amplify Promter regions
4367	pHDT_rev	SG	cacttcgtggtctcacattTAGCTAGTGAAAGAGGAAGATGTGGC	Amplify Promter regions
4366	pHDT4_fwd	SG	CATCCACTGCTCATAAAATGTGGGACCTCTAATAATAGAACTTTTGCATTCTG	Amplify Promter regions
4365	pFLP_rev	SG	cacttcgtggtctcacattTCTACTGTCTCTCTCTTTATATTTTCTTACTGTATATGTCC	Amplify Promter regions
4364	pFLP_fwd	SG	CATCCACTGCTCATAAAATGTGCATCCACTGCTCATAAAATGTGATATGTC	Amplify Promter regions
4363	g125_RBSC1A_R	EY	CCTTTGCAGTTAATCACCTTTGCATCGGAGGGTCTAGGATACATG	intorduce guide site w/in 125bp of TSS
4362	g125_RBSC1A_F	EY	GCAAAGGTGATTAACTGCAAAGGCACTCCAAAGCTTGTTCTCATTG	introduce guide site w/in 125bp of TSS
4361	g50_RBSC1A_R	EY	CCTTTGCAGTTAATCACCTTTGCTAGTGCTTTGGTCATCTATATATAATGATAACAAC	introduce guide site w/in 50bp of TSS
4360	g50_RBSC1A_F	EY	GCAAAGGTGATTAACTGCAAAGGGACCAAACCTCAGTCACACAAAGAGTAAAG	introduce guide site w/in 50bp of TSS
4359	g125_PUX10_R	EY	CCTTTGCAGTTAATCACCTTTGCGTTCTTTAGTAAAATGGTTTG	intorduce guide site w/in 125bp of TSS
4358	g125_PUX10_F	EY	GCAAAGGTGATTAACTGCAAAGGACAGTTTTCTAGATTCTCTAGAG	introduce guide site w/in 125bp of TSS
4357	g50_PUX10_R	EY	CCTTTGCAGTTAATCACCTTTGCCACGCTTTTGGATCTTCTCTTCTCTTC	introduce guide site w/in 50bp of TSS
4356	g50_PUX10_F	EY	GCAAAGGTGATTAACTGCAAAGGGGAAAATCGAATTAGGGTTTTCTG	introduce guide site w/in 50bp of TSS
4355	2444_delBsa_F	ARL	AGGCTTCTCCgaaacaGTTGATCTCA	UAS TPL-IAA14 cloning
4354	2444_delBsa_R	ARL	CTCTTGTTCCCAACACCC	UAS TPL-IAA14 cloning
4353	FRB_R1	ARL	tgccacatctcatgccagag	ScMED21 Sequencing primer
4352	FRB_R2	ARL	atagcatgcaagggctccag	ScMED21 Sequencing primer
4351	ScMED21_geno_F1	ARL	CGTGAAGTGCGCTTTTGTAGA	ScMED21 Sequencing primer
4350	ScMED21_geno_F2	ARL	TGCTTATATGCGTGAAGTGCG	ScMED21 Sequencing primer
4349	2444_delH2-9_F	ARL	GGTGGACCAGGTGGTGGA	TPL Mutagenesis primer
4348	2444_delH2-9_R	ARL	TTCATCGAGAAACTGTAAGATCAAGAAAACG	TPL Mutagenesis primer
4347	2444_delH1-2_F	ARL	TTTTTCTTCAATATGAAGTATTTTGAGGATG	TPL Mutagenesis primer
4346	2444_delH1-2_R	ARL	AGACGCATAATCCGGCAC	TPL Mutagenesis primer
4343	mTURQ-tUBQ1-R	EY	CAAGAGATGGGATTCTTGATAAGAGTCTCTTTACTTGTACAATTCGTCCATACCCAAGGT	Gibson primer
4342	NLS-mTURQ-F	EY	GGTAGTGGTAGTGGAAGCGGTAGTGGCAGTGTCTCTAAAGGTGAAGAATTATTTACTGGT	Gibson primer
4341	Generic-NLS-R	EY	ACTGCCACTACCGCTTCCACTACCACTACC	pGRN promoter cloning
4340	ARF19 mRFP to 2xHA tag mutagenesis Rv NEW	al	cgcataatccggcacatcatacggataGCCACCTCTGTTGAAAGAAG	make epitope-tagged vectors for co-IPs
4339	ARF19 sYFP to 3xFLAG tag mutagenesis Rv NEW CORRECTED	al	atctttataatctttatcatcatcatctttataatcGCCACCTCTGTTGAAAGAAG	make epitope-tagged vectors for co-IPs
4338	Promoter_seq_F1	EY	gagtaggggtacgataacattaac	sequence promoter in pGRN
4337	4G2_bbfrag_F	Romi	TTCTGTCATGTAATTAGTTATGTCA	remove ccdB
4336	4G2_bbfrag_R	Romi	cattttgtgatggatccactag	remove ccdB
4335	5G2_bbfrag_F	Romi	ttctatgtcaggctccctta	remove ccdB
4334	5G2_bbfrag_R	Romi	CATTTTGTGATGGGGGATC	remove ccdB
4331	TPLMon_HAmut_F	ARL	tatccgtatgatgtgccggattatgcgATGTCTTCTCTTAGTAGAGAG	Add HA to Mon - TPL Mutagenesis primers
4330	TPLMon_HAmut_R	ARL	cgcataatccggcacatcatacggataCATTTTGTGATGGATCCAC	Add HA to Mon - TPL Mutagenesis primers
4329	2259_N176H_F	ARL	GACTTTGATCcatCAGAGCTTAAATTG	TPL Mutagenesis primers to introduce tpl1 mutation
4328	2259_N176H_R	ARL	CTCAGCCTTGAATTTCTAAG	TPL Mutagenesis primers to introduce tpl1 mutation
4327	TPLNmon_2xHA_F	ARL	tatccgtatgatgtgccggattatgcgTCTTCTCTTAGTAGAGAGT	TPL monomer HA tagging
4326	2199_HbyHDels_F	ARL	CCAGCTTTCTTGTACAAAG	cytosus TPL deletions
4325	2199_delH1_F	ARL	GAGAAGTTTAAAGAGACTGTTC	cytosus TPL deletions
4324	2199_delLisH_R	ARL	TTTTTTGTACAAACTTGTTCTAG	cytosus TPL deletions
4323	2199_delLisH_F	ARL	TTTTTCTTCAATATGAAGTATTTTG	cytosus TPL deletions
4322	BIF1_col_F	Romi	GCCTTCGCCTGATGAAA	Col PCRs ZmIAAs
4321	ZmIAA28_col_F	Romi	GCTCAGATGCGATTGGA	Col PCRs ZmIAAs
4320	ZmIAA14_col_F	Romi	GTTCTGAAGCCATAGGTCTT	Col PCRs ZmIAAs
4319	ZmIAA12_col_F	Romi	GTCCACGATTCCAAGGG	Col PCRs ZmIAAs
4318	ZmIAA9_col_F	Romi	TAGGCACAAGGCCACC	Col PCRs ZmIAAs
4317	ZmIAA8_col_F	Romi	GGCTGAGGATCATGAAAGG	Col PCRs ZmIAAs
4316	4G2_col_R	Romi	atgcgtacacgcgtc	Col PCRs ZmIAAs
4315	REL2_N188_col_F	Romi	GGACAAGCTGAATTTCCCA	Col PCRs REL0
4313	REL2_N91_col_F	Romi	CAAGGTGGAGGACAACC	Col PCRs REL2
4314	5G2_col_R	Romi	agaaagctgaacgagaaacg	Col PCRs REL1
4312	ViAFB2_gib_F	Romi	ggatcccccatcacaaaatgAACTATTTTCCGGATGAG	Interspecies gibs
4311	ViAFB2_gib_R	Romi	ttgtaatctccaccagatccAAGCGTCCACACGAAGT	Interspecies gibs
4310	REL2_gib_F	Romi	ggatcccccatcacaaaatgTCGTCTCTTAGCAGGGAG	ZmREL2 gibs
4309	REL2_N91gib_R	Romi	taagggagcctgacatagaaTCAGGCTCTGTCATGCCTAT	ZmREL2 gibs
4308	REL2_N188_gib_R	Romi	taagggagcctgacatagaaTCAGTTCTTGCAAAGCTGATG	ZmREL2 gibs
4307	Fix ARF19 2x HA Rv	al	CATACGGATAgccaccaccTCTGTTGAAAG
4306	Fix ARF19 2x HA Fw	al	CTTTCAACAGAggtggtggcTATCCGTATG
4305	Fix ARF19 3x FLAG Rv	al	CTTTATCATCATCATCTTTATAATCgccaccTCTGTTGAAAG
4304	Fix ARF19 3x FLAG Fw	al	CTTTCAACAGAggtggcGATTATAAAGATGATGATGATAAAG
4303	Fw ARF5 minigene plus XhoI	al	cgaacgCTCGAGtgttcctagtctctcctgctgattattatgacttatttagttacc
4302	Fw ARF5 minigene plus KpnI	al	cgaacgGGTACCtgttcctagtctctcctgctgattattatgacttatttagttacc
4303	REL2_gib_F	Romi	agtggatccatcacaaaatgTCGTCTCTTAGCAGGGAG	ZmREL2 gibs
4302	REL2_N91gib_R	Romi	taactaattacatgacagaaTCAGGCTCTGTCATGCCTAT	ZmREL2 gibs
4301	REL2_N188_gib_R	Romi	taactaattacatgacagaaTCAGTTCTTGCAAAGCTGATG	ZmREL2 gibs
4300	BIF1_gib_F	Romi	agtggatccatcacaaaatgTCGGTGGATACGGAGC	ZmIAA gibs
4299	BIF1_gib_R	Romi	taactaattacatgacagaaTCATCGGGCGGCTC	ZmIAA gibs
4298	ZmIAA28_gib_F	Romi	agtggatccatcacaaaatgTCGCCTCCACTCG	ZmIAA gibs
4297	ZmIAA28_gib_R	Romi	taactaattacatgacagaaTCAGTTGCGGTTCTTGG	ZmIAA gibs
4296	ZmIAA14_gib_F	Romi	agtggatccatcacaaaatgGCTGGCGCCGA	ZmIAA gibs
4295	ZmIAA14_gib_R	Romi	taactaattacatgacagaaTCAGCTCTTGTTCTTGCACTTATCCT	ZmIAA gibs
4294	ZmIAA12_gib_F	Romi	agtggatccatcacaaaatgAGAGGAGGAGGAGCGG	ZmIAA gibs
4293	ZmIAA12_gib_R	Romi	taactaattacatgacagaaTCACGTCCTGCCTCTCGT	ZmIAA gibs
4292	ZmIAA9_gib_F	Romi	agtggatccatcacaaaatgGGAGACTCCGGAGG	ZmIAA gibs
4291	ZmIAA9_gib_R	Romi	taactaattacatgacagaaTCAGCAATCTGGTGGTCCT	ZmIAA gibs
4290	ZmIAA8_gib_F	Romi	agtggatccatcacaaaatgGAGGTCGCCGC	ZmIAA gibs
4289	ZmIAA8_gib_R	Romi	taactaattacatgacagaaTCAGTTGTTCTTGGCCG	ZmIAA gibs
4278	ScMed21_F	ARL	GGCCAACCGTACGTGCTTAA	Amplify MED21 from yeast for AA
4277	ScMed21_R	ARL	TGAATTTGGCTGGGAGTGCA	Amplify MED21 from yeast for AA
4276	ScMed21_F2	ARL	GCTGTTTCTGTAGAAGCCTTGT	Amplify MED21 from yeast for AA
4275	ScMed21_R2	ARL	CGTGGACAACTGCTGAACCT	Amplify MED21 from yeast for AA
4274	ScTUP1_F1	ARL	AATCCGGTACAGGCCACAAG	Amplify TUP1 from yeast for AA
4273	ScTUP1_F2	ARL	CGTGCTGTGAGAGTTTGGGA	Amplify TUP1 from yeast for AA
4272	ScTUP1_R1	ARL	AAGGATGGCCAACTCATCGG	Amplify TUP1 from yeast for AA
4271	ScTUP1_R2	ARL	GACGTGGACGAATCACCAGA	Amplify TUP1 from yeast for AA
4254	AFB2_LRR_F	EY	ttggaaactgttatgccattaatccagagagg	Amplify LRR region
4253	VA1_F	ARL	CCCCTTAGGTTGCAAATGCTCCG	SLARC cloning
4252	VA3_R	ARL	GCCGCGAGTCACTACTAAACTGTCTCTCC	SLARC cloning
4251	VA3_F	ARL	GGAGGTACTGGCCTAGCGTCGTGG	SLARC cloning
4250	VA4_R	ARL	TGGGGACACCATCCCGCC	SLARC cloning
4249	VA4_F	ARL	TTGGCGTTAATTGTAGCTTATTTCCCGC	SLARC cloning
4248	VA5_R	ARL	TCTATCAGCCCGACGACATGCATC	SLARC cloning
4247	VA5_F	ARL	GACTAAGACTCTGGTCACGGTTCAGAAGTGG	SLARC cloning
4246	VA6_R	ARL	AGCCGCAATCGTATCTGACTTCTCCC	SLARC cloning
4245	VA6_F	ARL	TGCACGGCGCTAGGTGTGATATC	SLARC cloning
4244	VA2_R	ARL	CTTCGCTTACATACCCATGACGGGTC	SLARC cloning
4243	VA1_R	ARL	ACGATCGCCGGCAGAGAAGG	SLARC cloning
4242	VA2_F	ARL	TGACGCTTGGATGCGTGACCC	SLARC cloning
4240	IAA14_EARtoA_F	ARL	tggcgctCCCGGAGGCACTGAAACC	UAS TPL-IAA14 cloning
4239	IAA14_EARtoA_R	ARL	gcacaagcCTCCGTCTCCTTAAGGTTCATTTTG	UAS TPL-IAA14 cloning
4238	IAA14_to-slr_F	ARL	GGGTTGGCCAtctGTGAGGAACT	UAS TPL-IAA14 cloning
4237	IAA14_to-slr_R	ARL	ACCACTTGTGCTTTAGCAG	UAS TPL-IAA14 cloning
4236	IAA14_del1-86_F	ARL	CGGAAAAATGTTATGGCTAATC	UAS TPL-IAA14 cloning
4235	IAA14_del1-86_R	ARL	TTTGAAGCCTGCTTTTTTG	UAS TPL-IAA14 cloning
4234	IAA14_GSlinker_F	ARL	agtggctcaggatctACCGTCGCCTTTGTGAAG	UAS TPL-IAA14 cloning
4233	IAA14_GSlinker_R	ARL	acctgatccagaaccTTTGAAGCCTGCTTTTTTGTAC	UAS TPL-IAA14 cloning
4228	pGRN-Seq-R	EY	cgccaagctcggaattaaccctc	Sequence through tUBQ1 to insert
4227	pUBQ1-seq-F	EY	CCTTCGACTAACGAGAAGTGG	Sequence pUBQ1 gRNA target site and the insert after pUBQ1
4226	ZmARF35_pDONROH_R	MMTT	AGAAAGCTGGGTGTCATTCAAACTGGTCATATGAAC	Add Kozak sequence and partial AttB overhangs to ZmARFs
4225	ZmARF35_pDONROH_F	MMTT	AAAAAGCAGGCTTCAAAATGATCAAGCAGCAGCAG	Add Kozak sequence and partial AttB overhangs to ZmARFs
4224	ZmARF34_pDONROH_R	MMTT	AGAAAGCTGGGTGTCAGTAGTCCAGAGGCACCACA	Add Kozak sequence and partial AttB overhangs to ZmARFs
4223	ZmARF34_pDONROH_F	MMTT	AAAAAGCAGGCTTCAAAATGAACCTCTCCCCGCCCAAGAT	Add Kozak sequence and partial AttB overhangs to ZmARFs
4222	ZmARF18_pDONROH_R	MMTT	AGAAAGCTGGGTGtcatcccaactcgaccgaa	Add Kozak sequence and partial AttB overhangs to ZmARFs
4221	ZmARF18_pDONROH_F	MMTT	AAAAAGCAGGCTTCAAAatgaggctctcgtcgtcgt	Add Kozak sequence and partial AttB overhangs to ZmARFs
4220	ZmARF16_pDONROH_R	MMTT	AGAAAGCTGGGTGTCAGAACTCGACCGAACCCA	Add Kozak sequence and partial AttB overhangs to ZmARFs
4219	ZmARF16_pDONROH_F	MMTT	AAAAAGCAGGCTTCAAAATGAAGCTCTCGCCGTCG	Add Kozak sequence and partial AttB overhangs to ZmARFs
4218	TPLDelH1_pNX32_F	ARL	GCTTTCTTGTACAAAGTG	mutagenisis primers - making TPLH1-pNX32
4217	TPLDelH1_pNX32_R	ARL	TTCATCGAGAAACTGTAAG	mutagenisis primers - making TPLH1-pNX32
4216	TPLBsaI_aatg_HA_F	ARL	cactctgtggtctcaaatgTATCCGTATGATGTGCCGGATTATGC	UAS TPL-IAA14 cloning
4215	TPLBsaI_gctt__R	ARL	ttcgtggtctcaaagctTATGATCTGTTCTTGAACTTCTCCATTGCTC	UAS TPL-IAA14 cloning
4214	AmpRProm_F	ARL	aaacaaataggggttccgcg	Sequencing SLARC
4213	LEU2tt_R	ARL	tgcgacacgaaattacaaaatgga	Sequencing SLARC
4212	AtHIS3_F	ARL	ATGGCTCGTACCAAGCAGACGG	Cloning cytoSUS target
4211	AtHIS3_R	ARL	AGCTCGTTCTCCTCTGATTCTTCTCGC	Cloning cytoSUS target
4210	MED21N31_F	ARL	GCTTTCTTGTACAAAGTGGTTG	MED21 Mutagenesis - MED21N31
4209	MED21N31_R	ARL	TGGTGGTGCATCCCTTTG	MED21 Mutagenesis - MED21N31
4208	TIR1_CRISPRguide_R	AK	ATTATTGGTCTCGAAACGTGGCCACTAACGTCGTCAAAATCTCTTAGTCGACTCTAC
4207	TIR1_CRISPRguide_F	AK	ATATATGGTCTCGATTGCTTGTGCTTTCTTCCTGCGAGTTTTAGAGCTAGAAATAGC
4206	AFB1_CRISPRguide_R	AK	ATTATTGGTCTCGAAACAAGAAGTTGAACTCTCTGGAAATCTCTTAGTCGACTCTAC
4205	AFB1_CRISPRguide_F	AK	ATATATGGTCTCGATTGCTTGTGTTGACTTCTTGTGAGTTTTAGAGCTAGAAATAGC
4204	AFB3_CRISPRguide_R	AK	ATTATTGGTCTCGAAACGCTCACGAAGATGCCTAATAAATCTCTTAGTCGACTCTAC
4203	AFB3_CRISPRguide_F	AK	ATATATGGTCTCGATTGAATGGAAGCTAAGCCATCAGGTTTTAGAGCTAGAAATAGC
4202	AFB4_CRISPRguide_R	AK	ATTATTGGTCTCGAAACACTCATCATCTGTGACTTCTAATCTCTTAGTCGACTCTAC
4201	AFB4_CRISPRguide_F	AK	ATATATGGTCTCGATTGCTTACTTTGGTCTGCTGTGAGTTTTAGAGCTAGAAATAGC
4200	AFB5_CRISPRguide_R	AK	ATTATTGGTCTCGAAACTGAGGATGTAACTTGTTTGGAATCTCTTAGTCGACTCTAC
4199	AFB5_CRISPRguide_F	AK	ATATATGGTCTCGATTGTGCTCCTTGGGTTTCTACTAGTTTTAGAGCTAGAAATAGC
4198	Cry1AC_qPCR_EY2_R	EY	ATGGTGTGCGCATTTCTCAC	qPCR primers for BT gene (primer blast showed no hits in the thaliana genome)
4197	Cry1AC_qPCR_EY2_F	EY	AAATGTGGCGAACCGAATCG	qPCR primers for BT gene (primer blast showed no hits in the thaliana genome)
4196	Cry1AC_qPCR_EY1_R	EY	AGCATTTACGGCCTTTTGCG	qPCR primers for BT gene
4195	Cry1AC_qPCR_EY1_F	EY	AACGGCTGGCGTGATAATTG	qPCR primers for BT gene
4192	TPLCseq_F1	ARL	GGAGCAGATGCACAGCTTTG	TPL Sequencing
4191	TPLCseq_F2	ARL	ACGGGGGAGTGCACATATTC	TPL Sequencing
4190	DelIAA14N_F	ARL	GGTGGAGGAACCGTCGCC	TPL-IAA14 newplant vector-test in yeast
4189	DelIAA14N_R	ARL	TTTGAAGCCTGCTTTTTTGTACAAACTTG	TPL-IAA14 newplant vector-test in yeast
4169	tdTomato_Del_Conf_F	EY	ACCACCTGTTCCTGGGGCATGGCA	confirm whether there is a deletion in tdTomato after linker
4168	tdTomato_Del_Conf_R	EY	GCGCATCTTCACCTTGTAGATCAG	confirm whether there is a deletion in tdTomato after linker
4167	rbcst w/ overlap to pGREEN RB Rv		gagctccaccgcggtggcggcctcgattgatgcatgttgtcaatcaattg
4166	pUBQ10 w/ overlap to pGREEN LB Fw		ctcactatagggcgaattgggtacCTCAACAACAAACTTTCCATTCACCCATTTATG
4165	Q5_tdTomato_ins_R2	EY	GTTGTTGTCCTCGGAGGAGGCGGTG	Sits on linker portion of tdTomato
#REF!	Q5_tdTomato_ins_F2	EY	ATGGCCGTCATCAAAGAGTTCATGCGCTTCAaGG	Insertion shifted towards the 3'-end Not ideal, but could potentially avoid complementarity with the first half of tomato
#REF!	end ARF19 sequencing		CAGCGGAAATGCTTGGAAAG
#REF!	end ARF5 sequencing		GAGTGAAGAAGGGATGAAG
#REF!	end pARF19 sequencing		gttaattttgctgaagaagaag
#REF!	end pARF5 sequencing		gtcttgctaaagcctagttag
#REF!	AGL42 mRFP to 2x HA tag mutagenesis Rv
#REF!	AGL42 mRFP to 2x HA tag mutagenesis Fw			didn't order--can use the ARF19 one probably
#REF!	BEH4 mRFP to 2x HA tag mutagenesis Rv
#REF!	BEH4 mRFP to 2x HA tag mutagenesis Fw			didn't order--can use the ARF19 one probably
#REF!	ARF7 mRFP to 2x HA tag mutagenesis Rv
#REF!	ARF7 mRFP to 2x HA tag mutagenesis Fw			didn't order--can use the ARF19 one probably
#REF!	Q5_tdTomato_ins_R1	EY	TGAAGCGCATGAACTCTTTGATGACGGCCATG	Extended to cover more of the linker
#REF!	Q5_tdTomato_ins_F1	EY	aGGTGCGCATGGAGGGCTCCATG	introduce the missing A into second half of tdTomato
4149	ttADH1_tttt_BsaIR	ARL	atatatGGTCTCgAAAAgaggtgtggtcaataagagcg	SLARC cloning
4148	ttADH1_tgag_BsaIF	ARL	atatatGGTCTCgTGAGgcgaatttcttatgatttatgatttttatt	SLARC cloning
4147	ARF19_tgag_BsaIR	ARL	atatatGGTCTCgCTCACCACTTTGTACAAGAAAGCTGGGTG	SLARC cloning
4146	pADH1_cagt_BsaIF	ARL	atatatGGTCTCgCAGTAAGAAATGATGGTAAATGAAATAGGAAAT	SLARC cloning
4145	2257_Delhelix_9R	ARL	ATTTCTAAGAGTAGGGAACTGCAATTTATC	H-by-H deletions of TPL-IAA14
4144	2257_Delhelix_8-9R	ARL	GTCCCCATACTTGGATAACTGTTC	H-by-H deletions of TPL-IAA14
4143	2257_Delhelix_7-9R	ARL	ATTAAAAGTTGAAAACACTTTCAAATCCTTCACTAG	H-by-H deletions of TPL-IAA14
4142	2257_Delhelix_6-9R	ARL	GGGACGATCATGCTTATCCAAAG	H-by-H deletions of TPL-IAA14
4141	2257_Delhelix_5-9R	ARL	CAGAGAGATACTTCTCAACCTCATCC	H-by-H deletions of TPL-IAA14
4140	2257_Delhelix_4-9R	ARL	ATTTCCATTGTGAACCTCATCCTCAAAATAC	H-by-H deletions of TPL-IAA14
4139	2257_Delhelix_3-9R	ARL	CCCAGATTCTTGTTCAAGCTTGTG	H-by-H deletions of TPL-IAA14
4138	AFB2_tgag_BsaIR	ARL	atatatGGTCTCgCTCAtcagagaatccacacaaatggcggcgc	SLARC cloning
4137	AFB2_aatg_BsaIF	ARL	atatatGGTCTCgAATGatgaattatttcccagatgaagtaatagagcatg	SLARC cloning
4136	IAA14_tgag_BsaIR	ARL	atatatGGTCTCgCTCAtTATGATCTGTTCTTGAACTTCTCCATTG	SLARC cloning
4135	pGPD_cagt_BsaIF	ARL	atatatGGTCTCgCAGTagtttatcattatcaatactcgccatttca	SLARC cloning
4134	pP32X_cagt_BsaIF	ARL	atatatGGTCTCgCAGTAAACAGCACCAAACTTATATCTCTCATGTG	SLARC cloning
4131	LEU2_BsaI_R	ARL	atatatGGTCTCgAAAAtaactttttgtgtggtgccctc	LEU2 Cassette cloning
4130	LEU2_BsaI_F	ARL	atatatGGTCTCgCAGTaactgtgggaatactcaggtatcgtaag	LEU2 Cassette cloning
4128	TPLMon1_ExpF	ARL	aaaacctctacttccaatcGATGTCTTCTCTTAGTAGAGAGtctGTTTTC	TPL Ecoli Expression
4127	TPLMon1_ExpF2	ARL	aaaacctctacttccaatcGATGTCTTCTCTTgcTAGAGAGtctGT	TPL Ecoli Expression
4126	ARS/CEN_BsmbI_R	ARL	tataatcgtctcgactcgttaggcgcgccagagttaattaagacg	SLARC cloning - Amplify ARS/CEN
4125	ARS/CEN_BsmbI_F	ARL	attatacgtctcccattagacgtcgggtccttttcatcacgt	SLARC cloning - Amplify ARS/CEN
4122	ProteinA_SeqR	ARL	cttcatcgtgttgcgcaagg	sequencing pMETOYC clones R
4121	pMET15_F	ARL	aggcgccatcctcatgaaaa	sequencing pMETOYC clones F
4120	Fonepot	Romi	CACACCTCAGcTTATCATTATC	One-pot mutagenesis compatibility
4119	Ronepot	Romi	GTCAATAAGAGCGACCTC	One-pot mutagenesis compatibility
4118	pXN32_DelCass_R	ARL	AGCTTTTTTGTACAAACTTG	mutagenizing pMETOYC
4117	pXN32_DelCass_F	ARL	TCTCGTTCAGCTTTCTTG	mutagenizing pMETOYC
4116	pNX32_muta_F	ARL	GCTTTCTTGTACAAAGTG	mutagenizing pMETOYC
#REF!	ARF5 mRFP to 2x HA tag mutagenesis Rv	al
#REF!	ARF5 mRFP to 2x HA tag mutagenesis Fw	al	tatccgtatgatgtgccggattatgcgTAAGAGCTTTCGTTCGTATC	didn't order--can use the ARF19 one probably
#REF!	ARF19 sYFP to 3xFLAG tag mutagenesis Rv	al	atctttataatctttatcatcatcatctttataatcCACCTCTGTTGAAAGAAG
#REF!	ARF19 sYFP to 3xFLAG tag mutagenesis Fw	al	gatgatgataaagattataaagatgatgatgataaaTAAGCTTGCTCTCAAGATC
#REF!	ARF19 mRFP to 2x HA tag mutagenesis Rv	al	cgcataatccggcacatcatacggataGCCACCCACCTCTGTTGA
#REF!	ARF19 mRFP to 2x HA tag mutagenesis Fw	al	tatccgtatgatgtgccggattatgcgTAAGAGCTTTCGTTCGTATCATC
#REF!	pUBQ10 GG Rv	al	cacttcgtggtctcacattCTGTTAATCAGAAAAACTCAGATTAATCGACAAATTCG
#REF!	pUBQ10 GG Fw	al	cactctgtggtctcaggagCTCAACAACAAACTTTCCATTCACCCATTTATG
#REF!	M473L_MAMA_Common	EY	GTCAAATGACCAATGCTG
#REF!	M473L_MAMA_Mutant	EY	GGGAGGGGCGGGGAAGGGGAggacaaaacatgatgAaA
#REF!	M473L_MAMA_Original	EY	GGACAAAACATGATGGAT
#REF!	D170E_MAMA_Common	EY	AGCCAATTTTTCAAGTGG
#REF!	D170E_MAMA_Mutant	EY	CGGAGCGGGACGGGGAAGACGAGTGATGTTGACCAA
#REF!	D170E_MAMA_Original	EY	GAGTGATGTTGACTAC
4091	TPL_delH1_F	ARL	GGGGGGAGAGGACCAGGT	TPL Mutagenesis primer
4090	TPL_delH1_R	ARL	CTCTTCATCGAGAAACTGTAAGATCAAGAAAACG	TPL Mutagenesis primer
4089	TPL_2180_L8S_F	ARL	TAGTAGAGAGtctGTTTTCTTGATCTTACAG	TPL Mutagenesis primer
4088	TPL_2180_L8S_R	ARL	AGAGAAGACATCATTTTGTG	TPL Mutagenesis primer
4087	TPL_2178_L8S_F	ARL	TGCTAGAGAGtctGTTTTCTTGATCTTACAG	TPL Mutagenesis primer
4086	TPL_2178_L8S_R	ARL	AGAGAAGACATCATTTTGTG	TPL Mutagenesis primer
4085	TPLN_1xHA_F	ARL	gccggattatgcgTCTTCTCTTAGTAGAGAGC	HA-tagged IAA14-yeast vector cloning
4084	TPLN_1xHA_R	ARL	acatcatacggataCATCATTTTGTGATGGATC	HA-tagged IAA14-yeast vector cloning
4083	TPLN_2xHA_F	ARL	tatccgtatgatgtgccggattatgcgTCTTCTCTTAGTAGAGAGC	HA-tagged IAA14-yeast vector cloning
4082	TPLN_2xHA_R	ARL	cgcataatccggcacatcatacggataCATCATTTTGTGATGGATC	HA-tagged IAA14-yeast vector cloning
6071	new Fw pAGL42 + XhoI		cgaacgCTCGAGgcagaggttgaaggcaaacgcc
6070	genomicAFB5_R_long	AK	TCTCCACCACCACACTTTCC
6069	genomicAFB5_F_long	AK	CCCTTAGGAGGACACACCT
6068	genomicAFB3_R_long	AK	TGCACTCATCCAGAGCATGG
6067	genomicAFB3_F_long	AK	AAGGTGTCATCGTCCCAACG
6066	genomicAFB1_R_long	AK	TTTGAGAGATGCTTTGCGGC
6065	genomicAFB1_F_long	AK	AAAGCGGTGGAGGAGGATTG
6064	genomicTIR1_R_long	AK	AGGTGCTGTTCCAAAACCGA
6063	genomicTIR1_F_long	AK	TTACGGGGCTTCCCCTCATA
6062	TPLdelLisH_F	ARL	TTTTTCTTCAATATGAAGTATTTTG	delete LisH domain
4061	TPLdelLisH_R	ARL	AGAAGACATCATTTTGTGATG	delete LisH domain
4060	TPLStop_F	ARL	TAATTCTGTCATGTAATTAGTTATG	C-terminal (N188) Forward primer (after stop in pGP4G2)
4057	IAA14-ohtplH1-5_F	ARL	ggagaggaccaggtggtggacatcaaaCAAGTTTGTACAAAAAAGCAGGCTTCAAAATGA	HA-tagged IAA14-yeast vector cloning
4056	IAA14-ohcyc1t_R	ARL	gtgacataactaattacatgacagaaTTAAGCGTAATCTGGCACATCGTATGGGTA	HA-tagged IAA14-yeast vector cloning
4055	pGP4G2_ohIAA14_F	ARL	ATACGATGTGCCAGATTACGCTTAAATTAGTTATGTCACGCTTACATTCACGCCC	HA-tagged IAA14-yeast vector cloning
4054	pGP4G2_ohTPLH1-5_R	ARL	GAAGCCTGCTTTTTTGTACAAACTTGtttgatgtccaccacctggtcctctc	HA-tagged IAA14-yeast vector cloning
4053	Fw pAGL42 + XhoI		cgaacgCTCGAGgcagtatttcgcttcgggagtcag
4052	Fw pBEH4 + XhoI		cgaacgCTCGAGgatttcagtgaaaacttttttttttttttcagtgaaaac
4051	Fw pARF7 + XhoI		cgaacgCTCGAGaaaaaaaagctaggcgtcgaaatccataac
4050	Fw pARF5 + XhoI		cgaacgGGTACCtactatatatccacttataaattataatatgtttgattatttttctc
4049	Fw pARF7 + KpnI		cgaacgGGTACCaaaaaaaagctaggcgtcgaaatccataac
4048	Fw pARF19 + KpnI		cgaacgGGTACCccacgcgcagcaaatattgacc
4047	Rv rbcst + NotI		cgaacgGCGGCCGCtcgattgatgcatgttgtcaatcaattg
4046	Fw pARF19 + XhoI		cgaacgCTCGAGccacgcgcagcaaatattgacc
4045	Rv Act2 + XhoI		cgaacgCTCGAGaaatggtgcgatcttaaaatatctgactttgtg
4044	Fw pARF5 + KpnI		gaacgGGTACCtactatatatccacttataaattataatatgtttgattatttttctc
4043	tdTomato_Unique_Seq_R	EY	TCTTTGATGACCTCCTCGCC	Avoid homology (5bp diff) with Venus/td itself, sequences pUBQ1*
4042	mCherry_R_seq	HG	GTCTTCTTCTGCATTACGGGGCC
4041	BraA05004402_F1	AA	TCAGCCGGAGGCAAACAAGT
4040	BraA05004402_F2	AA	ACAAGGTGGACGAGGAGGCT
4039	BraA05004402_R1	AA	AGCCTCTGGCTTTGGCTTGACT
4038	BraA05004402_R3	AA	TGCTGCAACCTCCTTTACGTCTGC
4037	BraA07002307_F1	AA	AGGCTTGTTCGTCGGTGCGG
4036	BraA07002307_F2	AA	CCGTTCCGGCAACCTCCGTC
4035	BraA07002307_R1	AA	GACGGAGGTTGCCGGAACGG
4034	BraA07002307_R2	AA	CGAACGCGCGAACCACCAAC
4033	BraA10001774_F1	AA	CCTGGAGCCTGACGGCGTTG
4032	BraA10001774_F2	AA	CGGGTTACTGGGGCGGGGTA
4031	BraA10001774_R1	AA	GTGTCGGAGTCGCCGCTCTC
4030	BraA10001774_R2	AA	CCGTCTCCCACGTCGGTTCG
4029	BraA01003347_F1	AA	GGCGGAGAGGTGGGTAGGGG
4028	BraA01003347_F2	AA	ATGACGGGCAAGGCGGAAGC
4027	BraA01003347_R1	AA	GCTCCGGTTCCAGCGGTCAC
4026	genomicAFB5_R_3	AK	ACACCGATGCTCCCAAAACA
4025	genomicAFB5_F_3	AK	CTCCCACTCTCTCACACCCC
4024	genomicAFB5_R_2	AK	GCATTCCTCCCAAGTCCCAA
4023	genomicAFB5_F_2	AK	AAGCTCCCACTCTCTCACAC
4022	genomicAFB4_R_3	AK	GGCCTCATTTGCACCAAAGT
4021	genomicAFB4_F_3	AK	AAACACCAAGACCAGCTCCT
4020	genomicAFB4_R_2	AK	TTTTCCCCAATCATGGCCTCA
4019	genomicAFB4_F_2	AK	AAACACCAAGACCAGCTCCTT
4018	genomicAFB3_R_3	AK	AGTGCACTCATCCAGAGCAT
4017	genomicAFB3_F_3	AK	TGAGCCTCCGATTTCGAACC
4016	genomicAFB3_R_2	AK	GCACTCATCCAGAGCATGG
4015	genomicAFB3_F_2	AK	AGCCTCCGATTTCGAACCTG
4013	genomicAFB1_F_4	AK	CACATGGGTGCAAGCTCAAC
4012	genomicAFB1_R_3	AK	TCTCCCACAACAATGTCTGC
4011	genomicAFB1_F_3	AK	TAGGCTCACATGGGTGCAAG
4010	genomicTIR1_R_4	AK	CCCCACCAGGATCTCTCAGT
4009	genomicTIR1_F_4	AK	TCGAGGTTATTTGGCCGCAA
4008	genomicTIR1_R_3	AK	GCGGACAAAGGAAATGGCAA
4007	genomicTIR1_F_3	AK	ATCTCCGTTAATGGCGCCTC
4006	111(ZmAFB23a)R	Romi	CACACCAGGTCTCAATCCATCCTAGAATACTCACGAACCCAGGGGT
4005	Act2 + SacI Rv		GGTGGTGAGCTCagcgaaatggtgcgatcttaaaatatctgac
4004	pARF7 + KpnI Fw primer		GGTGGTGGTACCaaaaaaaagctaggcgtcgaaatccataacttc
4003	genomicAFB1_R_2	AK	tgaaagggaacaaatggaaggt	reverse primer for AFB1 genotyping
4002	genomicAFB1_F_2	AK	actctttcttgtcttccacttgc	forward primer for AFB1 genotyping
4001	genomicTIR1_R_2	AK	ggttatatgaagcagccgagatt	reverse primer for TIR1 genotyping
4000	genomicTIR1_F_2	AK	ttcttcgaacgctgtccaac	forward primer for TIR1 genotyping
3999	tdTomato-linker-R	E.Y.	GGCCATGTTGTTGTCCTCGG	Bypasses any potential homology with Venus
3998	tdTomato-linker-F	E.Y.	CCGAGGACAACAACATGGCC	Bypasses any potential homology with Venus
3997	108(ZmTIR1gib)F	romi	GCGTACAAATACTGGGATCTGGTGGAGATTACAAGGATCATGATGG	TIR1/AFB1 fast gibson
3996	110(ZmTIR1gib)R	romi	CCTTGTAATCTCCACCAGATCCCAGTATTTGTACGCAAGCAGGCG	TIR1/AFB1 fast gibson
3995	pARF19 w/ pGREEN overhangs Fw	al	CTATAGGGCGAATTGGGTACCccacgcgcagcaaatattgacc
3994	pARF7 w/ pGREEN overhangs	al	CTATAGGGCGAATTGGGTACCaaaaaaaagctaggcgtcgaaatccataacttc
3993	pARF5 w/ pGREEN overhangs	al	GGCGAATTGGGTACCTACTATATATCCACTTATAAATTATAATATGTTTGATTATTTtt
3992	Act2 Rv w/ pGREEN overhangs	al	CGGTGGCGGCCGCaaatggtgcgatcttaaaatatctgactttgtg
3991	pGREEN 0029 Fw	al	GCGGCCGCCACCGC
3990	genomicAFB5_R	AK	tgccaccaccatcatcatct	reverse primer for AFB5 genotyping
3989	genomicAFB5_F	AK	aagctcccactctctcacac	forward primer for AFB5 genotyping
3988	genomicAFB4_R	AK	atcatggcctcatttgcacc	reverse primer for AFB4 genotyping
3987	genomicAFB4_F	AK	caaacaccaagaccagctcc	forward primer for AFB4 genotyping
3986	genomicAFB3_R	AK	tcaatggctgaattacggtga	reverse primer for AFB3 genotyping
3985	genomicAFB3_F	AK	ggatctcactggaccacgaa	forward primer for AFB3 genotyping
3984	genomicAFB1_R	AK	agggaacaaatggaaggtgaa	reverse primer for AFB1 genotyping
3983	genomicAFB1_F	AK	cttgtcttccacttgctctgt	forward primer for AFB1 genotyping
3982	genomicTIR1_R	AK	tggttatatgaagcagccgag	reverse primer for TIR1 genotyping
3981	genomicTIR1_F	AK	tatctccgttaatggcgcct	forward primer for TIR1 genotyping
3980	tdTomato-seq-F	E.Y.	ATGGTGAGCAAGGGCGAGGAGG	At beginning of tdTomato, confirms if linker is present (i.e. td or d Tomato)
3979	pUBQ1-seq-F	E.Y.	CCTTCGACTAACGAGAAGTGG	Confirm insert and pUBQ1-target-site
3978	97 FBOX R	Romi	CACACCAGGTCTCAGTTCCCGACAAACACACCCCTTC	gg fuse into pGP8GF
3977	98 LRR F	Romi	CACACCAGGTCTCAGAACTGTTACGCCGTAAGACCG	gg fuse into pGP8GF
3976	95 AtTIR1 F	Romi	CACACCAGGTCTCAAATGCAGAAGCGAATAGCCTTGTCGTTTCC	gg AtTIR1 into pGP8GF
3975	96 AtTIR1 R	Romi	CACACCAGGTCTCAATCCTAATCCGTTAGTAGTAATGATTTGCCTGGAAAACCT	gg AtTIR1 into pGP8GF
3974	85 OsAFB2 R (pGP8GF)	Romi	CACACCAGGTCTCAATCCTAGAATTTTAACGAAATTTGGCGCATCG	gg OsAFB2 into pGP8GF
3973	p2301Y-bb-r	E.Y.	CATGCACATACAAATGGACGAAC	confirming end of the insert or paired with pUBQ6-F for colony PCR
3972	pUBQ6-F	E.Y.	CAATCTTCAAAAGTCCCACATCGC	Paired with p2301Y-bb-r for colony PCR
3971	pUBQ6-R	E.Y.	GCGATGTGGGACTTTTGAAGATTG	Paired with tOCS-F for colony PCR
3970	tOCS-F	E.Y.	cgtctcgcatatctcattaaagcag	confirming insert after tOCS with sequencing or paired with pUBQ6-R for colony PCR
3969	Set_1_Myb3r135_01_F	HG	ATATATGGTCTCGATTGAAAACTCAAACATGGAGAGGCGGGTTTTAGAGCTAGAAATAGC
3968	Set_1_Myb3r135_02_F	HG	ATATTATTGGTCTCAAGATTGAACCTCATCTGGAGAAGAAGCGGGTTTTAGAGCTAGAAATAGC
3967	Set_1_Myb3r135_02_R	HG	ATTATTGGTCTCGAAACCCAATTCTTTTGAGTCGGTTTGGCAATCACTACTTCGTCTCTAACCA
3966	Set_2_Myb3r135_01_F	HG	ATATATGGTCTCGATTGCTCAAACATGGAGAGGCGGACGGGTTTTAGAGCTAGAAATAGC
3965	Set_2_Myb3r135_02_F	HG	ATATTATTGGTCTCAAGATTGCAGTTCGGTTTGGAGAAAATAGGGTTTTAGAGCTAGAAATAGC
3964	Set_2_Myb3r135_02_R	HG	ATTATTGGTCTCGAAACCCAGATAAGCGAATTCGCGAGGACAATCACTACTTCGTCTCTAACCA
3963	Set_4_Myb3r14_02_R	HG	ATTATTGGTCTCGAAACCCAGTTTCTGGGTATCGTCGTTGAATCTCTTAGTCGACTCTAC
3962	Set_3_Myb3r14_02_R	HG	ATTATTGGTCTCGAAACCCTCCAATCGGAGATAAATGTTCAATCTCTTAGTCGACTCTAC
3961	pARF5 with yeast homology Fw	al	ataggcgtctcgcatatctcattaaagcagtactatatatccacttataaattataatat
3960	rbcst with yeast homology Rv	al	cttaagaaactttattgccaaatgtttgaacgtcgattgatgcatgttgtcaatcaattg
3959	IAA18CRISPRgeno_F	MMTT	TAAGTTGCTTCAAGAGTTTTGGATAGTG
3958	IAA18CRISPRgeno_R	MMTT	AGACAAGAACAAAGTTTATGCAGATAGATGGGA
3957	IAA26CRISPRgeno_F	MMTT	CTTGGGTTGATCAATGGAAGGTTGTC
3956	IAA26CRISPRgeno_R	MMTT	TAGCGAGCACAAGCTCTTCAAA
3955	IAA28CRISPRgeno_F	MMTT	TTCCTTGCCAACCACCCATA
3954	IAA28CRISPRgeno_R	MMTT	GGAACTCCTTCCATGTTGATCTTAACG
3953	BrPIFI_F1	aaa	GCCACCACTCTTGCACCCCC	senescence RNAseq validation Recovery responders different between WT and phyB
3952	BrPIFI_F2	aaa	TGCAGCTGCTAACACCGCCG	senescence RNAseq validation Recovery responders different between WT and phyB
3951	BrPIFI_F3	aaa	GCCACCACTCTTGCACCCCC	senescence RNAseq validation Recovery responders different between WT and phyB
3950	BrPIFI_R1	aaa	CCGCGGTTGGAGGAAGACCG	senescence RNAseq validation Recovery responders different between WT and phyB
3949	BrPIFI_R2	aaa	GGGGGTGCAAGAGTGGTGGC	senescence RNAseq validation Recovery responders different between WT and phyB
3948	BrPIFI_R3	aaa	CCCGCGGTTGGAGGAAGACC	senescence RNAseq validation Recovery responders different between WT and phyB
3947	BrPIFIb_F1	aaa	GCCGCTAACACCGCCGCTAT	senescence RNAseq validation Recovery responders different between WT and phyB
3946	BrPIFIb_R1	aaa	AGGGGTGCAAGAGTCGTGGC	senescence RNAseq validation Recovery responders different between WT and phyB
3945	BrPIFIb_F2	aaa	GCCGCTAACACCGCCGCTAT	senescence RNAseq validation Recovery responders different between WT and phyB
3944	BrPIFIb_R2	aaa	GAGGGGTGCAAGAGTCGTGGC	senescence RNAseq validation Recovery responders different between WT and phyB
3943	BrMEX1_F1	aaa	TTCTCCCGCCTCCCGCTGAA	senescence RNAseq validation Recovery responders different between WT and phyB
3942	BrMEX1_F2	aaa	CGCCGACTCGTCCCTGTTCG	senescence RNAseq validation Recovery responders different between WT and phyB
3941	BrMEX1_F3	aaa	GAATCGCCGCCGACTCGTCC	senescence RNAseq validation Recovery responders different between WT and phyB
3940	BrMEX1_R1	aaa	CGAACAGGGACGAGTCGGCG	senescence RNAseq validation Recovery responders different between WT and phyB
3939	BrMEX1_R2	aaa	TGCGGTGTTGTTTCCCGCCA	senescence RNAseq validation Recovery responders different between WT and phyB
3938	BrMEX1_R3	aaa	TGCGGTGTTGTTTCCCGCCA	senescence RNAseq validation Recovery responders different between WT and phyB
3937	BrMEX1b_F1	aaa	CGACTCCTCCTCCTCGCGCT	senescence RNAseq validation Recovery responders different between WT and phyB
3936	BrMEX1b_F2	aaa	TCCGTGCTTCTCCCGGTGGT	senescence RNAseq validation Recovery responders different between WT and phyB
3935	BrMEX1b_F3	aaa	CTCGCGCTTCCTTCCGTGCT	senescence RNAseq validation Recovery responders different between WT and phyB
3934	BrMEX1b_R1	aaa	AGTCGGCGGCGAGTTGAAGC	senescence RNAseq validation Recovery responders different between WT and phyB
3933	BrRLK_F1	aaa	TCCGCCGTCGCGATCTCTCT	senescence RNAseq validation Recovery responders different between WT and phyB
3932	BrRLK_F2	aaa	TCTCCGCCGTCGCGATCTCT	senescence RNAseq validation Recovery responders different between WT and phyB
3931	BrRLK_F3	aaa	GGGATCCTCGCCTGGATCGGT	senescence RNAseq validation Recovery responders different between WT and phyB
3930	BrRLK_R1	aaa	CCCGCTCCAAACGCTTGTCCA	senescence RNAseq validation Recovery responders different between WT and phyB
3929	BrRLK_R2	aaa	CCCGCTCCAAACGCTTGTCCA	senescence RNAseq validation Recovery responders different between WT and phyB
3928	BrRLK_R3	aaa	GATGGCGATCCCCCAAGCGG	senescence RNAseq validation Recovery responders different between WT and phyB
3927	BrRLKb_F1	aaa	CTCTGCTGCGTCGTCGGGTC	senescence RNAseq validation Recovery responders different between WT and phyB
3926	BrRLKb_R1	aaa	CGCCGTGTCCGAGCTTCTCC	senescence RNAseq validation Recovery responders different between WT and phyB
3925	BrRLKc_F1	aaa	TGCAAGGCGAATCAAGCGGC	senescence RNAseq validation Recovery responders different between WT and phyB
3924	BrRLKc_F2	aaa	TGCAAGGCGAATCAAGCGGC	senescence RNAseq validation Recovery responders different between WT and phyB
3923	BrRLKc_F3	aaa	TCCGGCGACATCTCAGCTCTCA	senescence RNAseq validation Recovery responders different between WT and phyB
3922	BrRLKc_R1	aaa	CCGCTTGCGAGAAAGCGAGGA	senescence RNAseq validation Recovery responders different between WT and phyB
3921	BrRLKc_R2	aaa	CCGCTTGCGAGAAAGCGAGG	senescence RNAseq validation Recovery responders different between WT and phyB
3920	BrRLKc_R3	aaa	CAGCACGAGCTCCCGAAGGC	senescence RNAseq validation Recovery responders different between WT and phyB
3919	BrMGT6a_F1	aaa	CAGCATCCGCCACCGCAAGA	senescence RNAseq validation Recovery responders different between WT and phyB
3918	BrMGT6a_R1	aaa	GCCTTCGCAACAACCGCAGC	senescence RNAseq validation Recovery responders different between WT and phyB
3917	BrMGT6a_R2	aaa	CCGCAGCTGGAGTGATCGGC	senescence RNAseq validation Recovery responders different between WT and phyB
3916	rbcst Rv	al	tcgattgatgcatgttgtcaatcaattg
3915	pBLUNT Fw w Act2 overalp	al	gatattttaagatcgcaccatttCCTGAATTCTGCAGATATCCATCACACTG
3914	pBLUNT Fw with rbsct overlap	al	gacaacatgcatcaatcgaCCTGAATTCTGCAGATATCCATCACACTG
3913	pARF19 w/ pBLUNT overlap Fw	al	CAGTGTGCTGGAATTCAGGccacgcgcagcaaatattgacc
3912	pAGL42 w/ pBLUNT overlap Fw	al	CAGTGTGCTGGAATTCAGGgcagtatttcgcttcgggagtcag
3911	pARF5 w/ pBLUNT overlap Fw	al	GTGCTGGAATTCAGGtactatatatccacttataaattataatatgtttgattatttttc
3910	pBLUNT RV	al	CCTGAATTCCAGCACACTGGCG
3909	Gs12b-R	E.Y.	ACTGCCACTACCGCTTCCACTACCAC
3908	94(OsTIR1)F		CACACCAGGTCTCAAATGGGTAGAGGGGGGAGTAGGGCCG
3907	87(ZmAFB2-3-a)R		CACACCAGGTCTCAATCCTAGAATACTCACGAACCCAGGGGTATCGCA
3906	89(ZmAFB2-3-b1)R		CACACCAGGTCTCAATCCGCTTTGCAGAATCTTAACGAAATTGGG
3905	91(ZmAFB2-3-b2)R		CACACCAGGTCTCAATCCCAGTATCTGTACAAAGTTAGGGGCATCGTCCC
3904	58(3F6H)F		GGGGAATATAAGGTCTCCGGATCTGGTGGAGATTACAAGG	making pGP8GF
3903	83(ccdb)R		TCCACCAGATCCGGAGACCTTATATTCCCCAGAACATCAGG	making pGP8GF
3902	80(pGP8G2-bsacut)F		TCACCACCATTGATTCTATGTCAGGCTCCCTTATACACAGCCA	making pGP8GF
3901	ARF5 promoter Rv w/ CDS overalp		CACAAGACAATGAAGCCATcattacagagagatttttcaatgttctgttttgtctctc
3900	ARF19 promoter Rv w/ CDS overlap		GAAATCCATTTGATGGAGCTTTcattggtttatagaaagaacgaaaaaattggtttgg
3899	ARF5 CDS Fw		gATGGCTTCATTGTCTTGTGTTGAAGACAAG
3898	ARF19 CDS Fw		gAAAGCTCCATCAAATGGATTTCTTCCAAGTTC
3897	ARF5 CDS Rv w/ mScarlet overlap		cccttgctcaccatgccaccTGAAACAGAAGTCTTAAGATCGTTAATGCCTGC
3896	ARF19 CDS Rv w/ mScarlet overlap		cccttgctcaccatgccaccTCTGTTGAAAGAAGCTGCAGCAGAAGTG
3895	AGL42 CDS Rv w/ mScarlet overlap	al	cccttgctcaccatgccaccGCAGTTTCTATTTGGCAAACCGATGAATAAGTC
3894	Act2 Fw	al	gctctcaagatcaaaggcttaaaaagctgg
3893	mScarlet Rv w/ Act2 overlap	al	ctttgatcttgagagcaagcttacttgtacagctcgtccatgcc
3892	mScarlet Fw clone out	al	ggtggcatggtgagcaaggg
#REF!	TIR1-T154S	E.Y.	CTGCTATCGCTGCCTCTTGCAGGAATCTG	One-pot mutagenesis primer for TIR1
#REF!	TIR1-D170E	E.Y.	GAGTGATGTTGACGAAGTTAGTGGCCACTG	One-pot mutagenesis primer for TIR2
#REF!	TIR1-M473L	E.Y.	GACAGTGACTTAGGCTTGCATCATGTTTTGTC	One-pot mutagenesis primer for TIR3
#REF!	TIR1-S546L	E.Y.	CACCGGACCTCAGACCAGAGAGC	One-pot mutagenesis primer for TIR4
#REF!	74(1555-backbone)F	Romi	CACACCAGGTCTCAAAAATGGGTAGAGGGGGGAGTAGGGCCG	OsTIR1*, ZmTIR1/AFB1 gg
#REF!	75(1555-backbone)R	Romi	CACACCAGGTCTCAATCCTAGCCCGTGCATCTCCATATCCTG	OsTIR1*, ZmTIR1/AFB1 gg
#REF!	76(ZmTIR1-AFB1)F	Romi	CACACCAGGTCTCAGGATCTGGTGGAGATTACAAGGATCA	OsTIR1*, ZmTIR1/AFB1 gg
#REF!	77(ZmTIR1-AFB1)R	Romi	CACACCAGGTCTCATTTTGTGATGGGGGATCCACTAGTTCTAGAATCCG	OsTIR1*, ZmTIR1/AFB1 gg
#REF!	78(OsTIR1)F	Romi	CACACCAGGTCTCAAAAATGGGACGTGGCGGAGCGAGAGC	OsTIR1*, ZmTIR1/AFB1 gg
#REF!	79(OsTIR1)R	Romi	CACACCAGGTCTCAATCCCAGTATTTGTACGCAAGCAGGCGTGTCG	OsTIR1*, ZmTIR1/AFB1 gg
3871	TPL_Delhelix_1_F	ARL	GAGAAGTTTAAAGAGACTGTTC	TPL Mutagenesis primer
3870	TPL_Delhelix_1_R	ARL	CATCATTTTGTGATGGATC	TPL Mutagenesis primer
3869	TPL_Delhelix_8L_F	ARL	GGGAGAGGACCAGGTGGT	TPL Mutagenesis primer
3868	TPL_Delhelix_8L_R	ARL	CGCCTCAATCAGCTTTTTGAG	TPL Mutagenesis primer
3867	TPL_iso_helix_8+L_F	ARL	ACCAAGTCTGCAAGAGCG	TPL Mutagenesis primer
3866	TPL_iso_helix_8+L_R	ARL	CATCATTTTGTGATGGATCCAC	TPL Mutagenesis primer
3865	TPL_iso_helix_8L_F	ARL	AATCCTTTATTCCGTGATAAATTG	TPL Mutagenesis primer
3864	TPL_iso_helix_8L_R	ARL	CATCATTTTGTGATGGATC	TPL Mutagenesis primer
3863	TPL_iso_H1-2-8+L_F	ARL	AACTTCCGGGAGAATGAAC	TPL Mutagenesis primer
3862	TPL_iso_H1-2-8+L_R	ARL	CCCAGATTCTTGTTCAAG	TPL Mutagenesis primer
3861	TPL_Delhelix_3-8_F	ARL	AATCCTTTATTCCGTGATAAATTG	TPL Mutagenesis primer
3860	TPL_Delhelix_3-8_R	ARL	CCCAGATTCTTGTTCAAG	TPL Mutagenesis primer
3859	TPL_helix5_BsaI_R	ARL	atatatGGTCTCcagaacTTAGGGACGATCATGCTTATC	TPL Mutagenesis primer
3858	TPL_L8S_F	ARL	TAGTAGAGAGtctGTTTTCTTGATCTTACAG	TPL Mutagenesis primer
3857	TPL_L8S_R	ARL	AGAGAAGACATCATTTTGTG	TPL Mutagenesis primer
3856	TPL_I12T_F	ARL	CGTTTTCTTGactTTACAGTATCTCGATGAAG	TPL Mutagenesis primer
3855	TPL_I12T_R	ARL	AGCTCTCTACTAAGAGAAG	TPL Mutagenesis primer
3854	TPL_L8S_I12T_F	ARL	cttgactTTACAGTATCTCGATGAAG	TPL Mutagenesis primer
3853	TPL_L8S_I12T_R	ARL	aaaacagaCTCTCTACTAAGAGAAGAC	TPL Mutagenesis primer
3852	TPL_S5A_E19S_F	ARL	cttacagtatctcgatgaatctAAGTTTAAAGAGACTGTTCAC	TPL Mutagenesis primer
3851	TPL_S5A_E19S_R	ARL	atcaagaaaacgagctctctagcAAGAGAAGACATCATTTTGTG	TPL Mutagenesis primer
3850	TPL_T24A_E31S_F	ARL	cttgaacaatctTCTGGGTTTTTCTTCAATATG	TPL Mutagenesis primer
3849	TPL_T24A_E31S_R	ARL	cttgtgaacagcCTCTTTAAACTTCTCTTCATC	TPL Mutagenesis primer
3848	TPL_G23S_L27S_F	ARL	tcactctTCTGGGTTTTTCTTCAATATG	TPL Mutagenesis primer
3847	TPL_G23S_L27S_R	ARL	acagtagaCTCTTTAAACTTCTCTTCATC	TPL Mutagenesis primer
3846	BraraPhyAseq_F1	lh	TGTCTTGTCTCTGGTGTCAGGCA	sequencing
3845	BraraPhyAseq_R1	lh	GAGGGATGTCGGTGGCCGGA	sequencing
3844	BraraPhyAseq_F2	lh	CGAAGTTGCTTTCGCTGGTGGG	sequencing
3843	BraraPhyAseq_R2	lh	ACCAGGCTTCGTCACCTCGGA	sequencing
3842	BraraPhyAseq_F3	lh	AGCTCTAGGCCAAGTCAGTCCT	sequencing
3841	BraraPhyAseq_R3	lh	CGCAAAGCCTCTCCATGCTCCC	sequencing
3840	AGL42 CRISPR genotyping Fw alternative	al	aaaatgagagtgaaaatactaaatcgt
3839	AGL42 CRISPR full Rv genotyping Rv	al	TCTATTTGGCAAACCGATGA
3838	AGL42 CRISPR mid Rv genotyping Rv	al	TACTTGCGGTAGCGTTCGAT
3837	AGL42 CRISPR genotyping Fw	al	cctgtttcttgttttggcatc
3836	BEH4 CRISPR genotyping Rv	al	tcaaccgggtttgaaaatgt
3835	BEH4 CRISPR genotyping Fw	al	aggtgaagcagccaacaagt
3834	1) rbcst w/ overlap to RB Rv	al	gttatcccctgattctgtgtcgattgatgcatgttgtcaatcaattg
3833	2) pARF19 Fw w/ Act2 overlap	al	gatattttaagatcgcaccatttccacgcgcagcaaatattgacc
3832	3) pARF5 Fw w/ Act2 overlap	al	gatcgcaccattttactatatatccacttataaattataatatgtttgattatttt
3831	4) Act2 rv w/ no overlap	al	aaatggtgcgatcttaaaatatctgactttgtgc
3830	5) pAGL42 w/ LB overlap Fw	al	gtaatacgactcactataggggcaagaattcaagcttggaggcagtatttc
3829	6) pBEH4 w/ LB overlap Fw	al	gtaatacgactcactataggggatttcagtgaaaacttttttttttttttcagtgaaaac
3828	7) pARF19 w/ LB overlap Fw	al	gtaatacgactcactatagggccacgcgcagcaaatattgacc
3827	8) pARF5 w/ LB overlap Fw	al	gtaatacgactcactatagggtactatatatccacttataaattataatatgtttg
3826	9) pARF7 w/ LB overlap Fw	al	gtaatacgactcactatagggaaaaaaaagctaggcgtcgaaatccataacttc
3825	10) RB Fw	al	cacagaatcaggggataacgcagg
3824	11) LB Rv	al	ccctatagtgagtcgtattacaattcactggcc
3823	Old_IsCol_Seq_F	E.Y.	GTTCACGCCCATGGCTGTTTC	Sequencing region specific to Old1
3822	Old_IsCol_Seq_R	E.Y.	GCTAAGTCCATATTGGTACCCACAAG	Sequencing region specific to Old1
3821	1555-Amp F	Romi	ggatctggtggagattacaaggatcatg	manual gibson
3820	1555-Amp R	Romi	cattttgtgatgggggatccactagttc	manual gibson
3819	ZmARF29_pDONROH_R	MMTT	AGAAAGCTGGGTGCTAAGCTATTTGGATGCAGTCGTTCAAGACA	Add Kozak sequence and partial AttB overhangs to ZmARFs
3818	ZmARF29_pDONROH_F	MMTT	AAAAAGCAGGCTTCAAAATGATGGCCTCCTCGCAGGAGAA	Add Kozak sequence and partial AttB overhangs to ZmARFs
3817	ZmARF27_pDONROH_R	MMTT	AGAAAGCTGGGTGTCAGGCCCTCCATGCATTTG	Add Kozak sequence and partial AttB overhangs to ZmARFs
3816	ZmARF27_pDONROH_F	MMTT	AAAAAGCAGGCTTCAAAATGAAGGATCACGGATCGGG	Add Kozak sequence and partial AttB overhangs to ZmARFs
3815	ZmARF4_pDONROH_R	MMTT	AGAAAGCTGGGTGCTAAGCCATTTGCATGCAGTCGT	Add Kozak sequence and partial AttB overhangs to ZmARFs
3814	ZmARF4_pDONROH_F	MMTT	AAAAAGCAGGCTTCAAAATGATGACGTCCTCGTACGAGAAG	Add Kozak sequence and partial AttB overhangs to ZmARFs
3813	SC_scarlet _f	HG	TGTGGTCTCAAATGCCAAAGAAGAAGAGGAAAGTCGGAAGTGGTAGTGGTGTGAGCAAGGGCGAGGCAGTG	BP or gibson ZmARF into pDONR
3812	pARF5 with new BSA Fw	al	gtggtctcaTTCGggagtactatatatccacttataaattataatatgtttgattatttttctc	BP or gibson ZmARF into pDONR
3811	pARF19 with new BSA Fw	al	gtggtctcaTTCGggagccacgcgcagcaaatattg	BP or gibson ZmARF into pDONR
3810	OsTIR1* F	Romi	GGTAGAGGGGGGAGTAGGGC	More of the geneblock (67.2C)
3809	OsTIR1* R	Romi	TAGCCCGTGCATCTCCATATC	More of the geneblock (66.3C)
3808	RiAFB2 F	Romi	AACTATTTTCCGGATGAGGT	More of the geneblock (59.4C)
3807	RiAFB2 R	Romi	TAAAGTCCAAACAAAATCGG	More of the geneblock (59.6C)
3806	ViAFB2 F	Romi	AACTATTTTCCGGATGAGGTTCTAG	More of the geneblock (63.6C)
3805	ViAFB2 R	Romi	AAGCGTCCACACGAAGTGT	More of the geneblock (63.9C)
3804	1555-OsTIR1* F	Romi	tcccccatcacaaaatgGGTAGAGGGGGGAGTAGGGC	manual gibson fixed
3803	1555-OsTIR1* R	Romi	ttgtaatctccaccagatccTAGCCCGTGCATCTCCATATC	manual gibson fixed
3802	1555-RiAFB2 F	Romi	tcccccatcacaaaatgAACTATTTTCCGGATGAGGT	manual gibson fixed
3801	1555-RiAFB2 R	Romi	ttgtaatctccaccagatccTAAAGTCCAAACAAAATCGG	manual gibson fixed
3800	1555-ViAFB2 F	Romi	tcccccatcacaaaatgAACTATTTTCCGGATGAGGTTCTAG	manual gibson fixed
3799	1555-ViAFB2 R	Romi	ttgtaatctccaccagatccAAGCGTCCACACGAAGTGT	manual gibson fixed
3798	BrNSP5_F1	LH	GGTCGGAAGTGGGTTGAGTA	RNAseq
3797	BrNSP5_R1	LH	AACCCAAACCTTCCCTTCCA	RNAseq
3796	BrNSP5_F2	LH	GAGCTGGGAAGTTGTCTGGA	RNAseq
3795	BrNSP5_R2	LH	TCCACAACCTTCTCCCAAAC	RNAseq
3794	BrSCD_F1	LH	TCATTTGGAGAGAGCTGGCA	RNAseq
3793	BrSCD_R1	LH	AAGCGGACGATGTACCAAGA	RNAseq
3792	BrSCD_F2	LH	GGGAGTGGGGTGCATGTATA	RNAseq
3791	BrSCD_R2	LH	TGCCAGCTCTCTCCAAATGA	RNAseq
3790	BrCNGC11_F1	LH	AACATTCCCTACGGCCTGAA	RNAseq
3789	BrCNGC11_R1	LH	CGTAAACCCCACCAAAAGCA	RNAseq
3788	BrCNGC11_F2	LH	TGCTTTTGGTGGGGTTTACG	RNAseq
3787	BrCNGC11_R2	LH	CCCAACAGAGTTGCTTGTCC	RNAseq
3786	BrSAG12_F1	LH	AAGAGCACTAAACCGTCAGCA	RNAseq
3785	BrSAG12_R1	LH	GCCACTGCCTTCATTAGAGC	RNAseq
3784	BrSAG12_F2	LH	AACCGTCAGCAGCTTCTATCA	RNAseq
3783	BrSAG12_R2	LH	GCCACTGCCTTCATTAGAGC	RNAseq
3782	BrBGLU30_F1	LH	GCGTTTCGCTAGTCACCTTC	RNAseq
3781	BrBGLU30_R1	LH	GCCTTGTACCATCGTCGTTT	RNAseq
3780	BrBGLU30_F2	LH	CAGCTGATGGTCAAATTGGGA	RNAseq
3779	BrBGLU30_R2	LH	TCCACGGTAAATGAAGGCAAC	RNAseq
3778	BrBGLU30_F3	LH	CACAGTGGCCACATCATCG	RNAseq
3777	BrBGLU30_R3	LH	TGTAGACCGGCATGTTGTTG	RNAseq
3776	BrTFALCR_F1	LH	CAGGAGGACACGGTTTCTGT	RNAseq
3775	BrTFALCR_R1	LH	TCACAAGGTGGTTGTGCATT	RNAseq
3774	BrTFALCR_F2	LH	AACGTCGTCACCGTTAATCC	RNAseq
3773	BrTFALCR_R2	LH	GAACCAAACCGCAAAGACAT	RNAseq
3772	BrAHL29_F1_F2	LH	AAGGCACCGATCATCGTAAC	RNAseq
3771	BrAHL29_R1	LH	TTCCCCCTAAAACGGATACC	RNAseq
3770	BrAHL29_R2	LH	CCTGGCGTAAGTGGAAAGAC	RNAseq
3769	BrDUF97_F1	LH	GGTCATGGAGCCATCTGATT	RNAseq
3768	BrDUF97_R1	LH	AGAACCGTAGGAAGCACGAA	RNAseq
3767	BrDUF97_F2	LH	CTTCGTGCTTCCTACGGTTC	RNAseq
3766	BrDUF97_R2	LH	CAGCGAGCAAGCTCTCAATA	RNAseq
3765	BrPP2C_F1	LH	GTCCTAGAGTCTTGGGCGTT	RNAseq
3764	BrPP2C_R1	LH	CATCTTCCTCCGTCCGATC	RNAseq
3763	BrPP2C_F2	LH	AATTGCGGCGATTCTAGAGC	RNAseq
3762	BrPP2C_R2	LH	AACGCCCAAGACTCTAGGAC	RNAseq
3761	BrPP2C_F3	LH	CTCTGTCGGAATGGAAAGCC	RNAseq
3760	BrPP2C_R3	LH	ACCTCCTGCTTCCTCGATTC	RNAseq
3759	BrEXLB1_F1_F3	LH	ACGGAGGGTACAATCTGGTG	RNAseq
3758	BrEXLB1_F2	LH	TGGAAACGCATGAGGAGAGT	RNAseq
3757	BrEXLB1_R1	LH	TCCTCATGCGTTTCCACTCT	RNAseq
3756	BrEXLB1_R2	LH	TGTTGGAGTTGTAGGTGGCT	RNAseq
3755	BrEXLB1_R3	LH	AATTCAACGGCGAGGATGTC	RNAseq
3754	BrARSPR_F1	LH	AAGGAATGGTGGGGAAGCTT	RNAseq
3753	BrARSPR_R1	LH	GGTCAGAGCTCCACCAGAAT	RNAseq
3752	BrARSPR_F2	LH	CTTCACAGTCGCTTGGTTCC	RNAseq
3751	BrARSPR_R2	LH	TCAGCGAAACCACACAAACA	RNAseq
3750	BrARSPR_F3	LH	CGTCGAGAGGCCTAAAGAGT	RNAseq
3749	BrARSPR_R3	LH	TCCTCGTCCTGGTTTCTCAT	RNAseq
3748	BrCEP2_F1	LH	GATTGATGGGCACGAGGATG	RNAseq
3747	BrCEP2_R1	LH	CCGTTCCACAGTATCCCGTA	RNAseq
3746	BrCEP2_F2	LH	AATGGGGAGAGGGAGGCTA	RNAseq
3745	BrCEP2_R2	LH	CTCCATCGCAATACCGCATT	RNAseq
3744	BrCEP2_F3	LH	GGGGAGAGGGAGGCTACATA	RNAseq
3743	BrCEP2_R3	LH	AAGAGGCCTCCATCGCAATA	RNAseq
3742	BrENDO1_F1	LH	TCTTCTCGCTTGTCCACACA	RNAseq
3741	BrENDO1_R1	LH	CCTGACGTCACGCCTTCATA	RNAseq
3740	BrENDO1_F2	LH	ATCTTCGTGGACAGAGTGCA	RNAseq
3739	BrENDO1_R2	LH	ACGTCACGCCTTCATATCCA	RNAseq
3738	BrENDO1_F3	LH	TCATTCTCACGGCTCTAAAAGA	RNAseq
3737	BrENDO1_R3	LH	TGCACTCTGTCCACGAAGAT	RNAseq
3736	BrD01546_F1	LH	GAGCCACGGAAGAACAAGTG	RNAseq
3735	BrD01546_R1	LH	ACTGATCTGAATAGCGCCGA	RNAseq
3734	BrD01546_F2	LH	TCGGCGCTATTCAGATCAGT	RNAseq
3733	BrD01546_R2	LH	CGTCTCTTTGATCACCGTCG	RNAseq
3732	BrD01546_F3	LH	GCCTTGGCTTCAGAACTCAC	RNAseq
3731	BrD01546_R3	LH	ACATGGAGAAACAAGCAGCC	RNAseq
3730	BrSCPL31_F1	LH	AGAAACTCATCGCCGGGG	RNAseq
3729	BrSCPL31_R1	LH	AGCCACCCACTTACCTGTTT	RNAseq
3728	BrSCPL31_F2	LH	GTTCAGAAGGCTCTTCACGC	RNAseq
3727	BrSCPL31_R2	LH	GGCAAAACCGAGGGCTTTAA	RNAseq
3726	BrHON5_F1	LH	ACCAAGGCTAGTTACGAGGG	RNAseq
3725	BrHON5_R1	LH	AATCCTTCCAGCTCTTGTGC	RNAseq
3724	BrHON5_F2	LH	GCACAAGAGCTGGAAGGATT	RNAseq
3723	BrHON5_R2	LH	CTTCTGGCTGCACTTCTTCC	RNAseq
3722	BrHON5_F3	LH	GGAAGAAGTGCAGCCAGAAG	RNAseq
3721	BrHON5_R3	LH	GGGTCAGGATCAGGGTCTG	RNAseq
3720	BrSYSP_F1	LH	TGGGTTGGAGAAATCAGAGG	RNAseq
3719	BrSYSP_R1	LH	CTCGTTCCACGTACCCATCT	RNAseq
3718	BrSYSP_F2	LH	TCAGATCTACGCCGGAAGAC	RNAseq
3717	BrSYSP_R2	LH	CGAACCGTGCAGAATCAGAG	RNAseq
3716	BrSYSP_F3	LH	TCAGTTGTCTACGTGGCACT	RNAseq
3715	BrSYSP_R3	LH	TTTCTCCAACCCATGAGCCA	RNAseq
3714	BrFI2_F1	LH	ACGAAGCATTATTAGATGAAGCG	RNAseq
3713	BrFI2_R1	LH	CGCCCATTTGCATACCTGTT	RNAseq
3712	BrFI2_F2	LH	AGACGCAAACAGAAGGAAACA	RNAseq
3711	BrFI2_R2	LH	GGGTCGTCATATAATTGATCGCT	RNAseq
3710	BrFI2_F3	LH	CTGTTCTTGGAGCTGGCTTG	RNAseq
3709	BrFI2_R3	LH	GTGTGAAAGGTGCCGAGTTT	RNAseq
3708	BrTRP38_F1	LH	TTGTTACGCTTGGACACACG	RNAseq
3707	BrTRP38_R1	LH	GCCCTCGAGCAATACATGTG	RNAseq
3706	BrTRP38_F2	LH	TGCTGGAGAAGAGTTACGCT	RNAseq
3705	BrTRP38_R2	LH	ATGAAGCTTCCAACGCCTTG	RNAseq
3704	BrTRP38_F3	LH	CACATGTATTGCTCGAGGGC	RNAseq
3703	BrTRP38_R3	LH	TCCGATGCTCCAATCACCTT	RNAseq
3702	BrC01177_F1	LH	GTATGCGAAGAAACCTGGGG	RNAseq
3701	BrC01177_R1	LH	ACTTCCTCGTCATCCACCTC	RNAseq
3700	BrC01177_F2	LH	GGTGAAGTGCAAGAAGGTCA	RNAseq
3699	BrC01177_R2	LH	CCTCGTCATCCACCTCTTCA	RNAseq
3698	Rbcst clone out add BSAI back Rv	al	CATGGTCTCTAGCGTCGATTGATGCATGTTGTCAATCAATTG
3697	lvl 1 47751 bb + lvl 1 recognition site Fw	al	gtggtctcaTTCGcaagcaagaattcaagcttggag
3696	Act2 change lvl 1 recognition site Rv	al	gtggtctcaCGAAaaatggtgcgatcttaaaatatctgactttgtg
3695	pNL1555 F	Romi	ggatctggtggagattacaa	manually made gibson primers
3694	pNL1555 R	Romi	cattttgtgatgggggat	manually made gibson primers
3693	1555-ZmTIR1/AFB1 F	Romi	tcccccatcacaaaatgGGACGTGGCGGAGCG	manually made gibson primers
3692	1555-ZmTIR1/AFB1 R	Romi	ttgtaatctccaccagatccCAGTATTTGTACGCAAGCAGGCG	manually made gibson primers
3691	1555-OsTIR1* F	Romi	tcccccatcacaaaatgGGGAGGGGCGGTTCC	manually made gibson primers
3690	1555-OsTIR1* R	Romi	ttgtaatctccaccagatccAAGTCCGTGCATCTCCATATCTTG	manually made gibson primers
3689	1555-RiAFB2 F	Romi	tcccccatcacaaaatgAACTACTTTCCTGACGAAGTGCT	manually made gibson primers
3688	1555-RiAFB2 R	Romi	ttgtaatctccaccagatccCAGCGTCCAAACAAAATCCG	manually made gibson primers
3687	1555-ViAFB2 F	Romi	tcccccatcacaaaatgAATTACTTCCCTGACGAGGTTT	manually made gibson primers
3686	1555-ViAFB2 R	Romi	ttgtaatctccaccagatccCAGTGTCCAGACGAAGTGTG	manually made gibson primers
3685	OsTIR1* F	Romi	GGGAGGGGCGGTTCCC	wrong seq!
3684	OsTIR1* R	Romi	AAGTCCGTGCATCTCCATATCTTGG	wrong seq!
3683	RiAFB2 F	Romi	AACTACTTTCCTGACGAAGTGC	wrong seq!
3682	RiAFB2 R	Romi	CAGCGTCCAAACAAAATCC	wrong seq!
3681	ViAFB2 F	Romi	AATTACTTCCCTGACGAGGT	wrong seq!
3680	ViAFB2 R	Romi	CAGTGTCCAGACGAAGTGT	wrong seq!
3679	73_(plasmid1555)R	Romi	CATTTTGTGATGGGGGATCCACTAGTTCTAGAATCC
3678	SC1_At_RPL18_R	Hardik	CGAGGTCTCACACCAACCTTGAATCCACGACTCTTCCTCTTTCCT
3677	SC1_Bsa1_linker_HF_F	Hardik	CTCGGGTCTCAAATGGGACATCACCATCATCACCATGGTGGAGGTGATTAT
3676	C2_BLRP_F	Hardik	GAGGTCTCAGGTGGCCCAGGTGGTGGAATGGCTG
3675	C2_BLRP_R	Hardik	CTAGGTCTCAAAGCTCAAGATCCACCAGTATCCTC
3674	AFB1 g2	Romi	ATTATTGGTCTCGAAACGAATTTGTGTGGACGATACAAATCTCTTAGTCGACTCTAC
3673	AFB3 g1	Romi	ATATATGGTCTCGATTGGATGAATTATTTCCCAGACGGTTTTAGAGCTAGAAATAGC
3672	AFB3 g2	Romi	ATTATTGGTCTCGAAACCTGTTCGGTAGAGGTAAAGTAATCTCTTAGTCGACTCTAC
3670	AFB4 g2	Romi	ATTATTGGTCTCGAAACTCCTTGGGCCATCAAGGGATAATCTCTTAGTCGACTCTAC
3669	AFB5 g1	Romi	ATATATGGTCTCGATTGTGACCAACAATCTCCACCGTGTTTTAGAGCTAGAAATAGC
3668	AFB5 g2	Romi	ATTATTGGTCTCGAAACCGTTCTATAAAATCGTGACGAATCTCTTAGTCGACTCTAC
3667	pGREEN Rv 5'		GGTACCCAATTCGCCCTATAGTGAGTCG
3666	pGREEN Fw 3'		gattcgatgtcatgtaAAGCTTGATATCGAATTCC
3665	rbcst reverse with pGREEN overhangs	al	GCTTtacatgacatcgaatcgattgatgcatgttgtcaatcaattg
3664	pAGL42 Fw with pGREEN overhangs	al	CTATAGGGCGAATTGGGTACCgcagtatttcgcttcgggagtcagaaag
3663	pBEH4 Fw with pGREEN overhangs	al	GGGCGAATTGGGTACCgatttcagtgaaaacttttttttttttttcagtgaaaac
3662	ViAFB2 geneblock	Romi		geneblock afb2s
3661	OsTIR1 geneblock	Romi		geneblock OsTIR1
3656	RiAFB2 geneblock	Romi		geneblock afb2s
3655	Level 2 Rv sequencing primer	al	GTGGTTGGCATGCACATACAAATG
3654	Level 2 Fw sequencing primer	al	GTGGTGTAAACAAATTGACGC
3653	BrPhyBseq_R2	AA	CCGCCATACCGCACACAGCA
3652	BrPhyBseq_F2	AA	CGCCGGTTCTCGTGGTGCAA
3651	BrPhyBseq_F1	AA	GTTGATTGCCACGCGACGCC
3650	BrPhyBseq_R1	AA	ACCGCCATACCGCACACAGC
3649	BrPif4b_seq_R2	AA	TGCTTTGTACGCCAGCCATT
3648	BrPif4b_seq_R1	AA	AATGCTTTGTACGCCAGCCA
3647	BrPif4b_seq_F2	AA	CTGACATGGAACATCAAGGTTGGA
3646	BrPif4b_seq_F1	AA	TCTGACATGGAACATCAAGGTTGGA
3645	BrPif4a_seq_R2	AA	AGATTATGAACTTCAGCTGCTCGAC
3644	BrPif4a_seq_R1	AA	TGGCTGAATACATTATACACCCTCCG
3643	BrPif4a_seq_F2	AA	TCCAGAGATCTGACATGGAACACCA
3642	BrPif4a_seq_F1	AA	ACACCAAGGTTGGAGTTTTGAGGA
3641	BrPIf5seq_R1	AA	GCCTCCGGTTTAGCCGCCTC
3640	BrPif5seq_F2	AA	CCTGGCAAGAACCTTGGCCT
3639	BrPIf5seq_R3	AA	TGCCGGCATCGGTGGAAACC
3638	BrPif5seq_F3	AA	GGTCGTCCGGCTGCAGCAAA
3637	BrPif5seq_R2	AA	GGTTGCCGGCATCGGTGGAA
3636	BrPif5seq_F1	AA	ACCTGGCAAGAACCTTGGCCT
3635	Is-0-3-23270767-F	RW	CTTTCCCTTGGATTCGATTTCATGCTTT	Is-0 discriminating locus
3634	3-23270767-R	RW	TCTGAAACAAGAAGAAAGCAGCAAT
3633	3-23270767-F	RW	CTCTTTCCCTTGGATTCGATTTCATCTCT
3632	Old-1-3-23225142-F	RW	CGTAATACACTTGTAGCTCTATTCAACCATTTCT
3631	3-23225142-R	RW	AGAGACACTAGAGTAGAGGTAAGCAAA
3630	3-23225142-F	RW	ACGTAATACACTTGTAGTTCTATTCAACCATTGTAA
3629	62_(pGP5G2)F		CATCACCACCATTGAATGTCAGGCTCCCTTATACACAGCCA	gibson pGP5G2-ZmTIR1/AFB4
3628	63_(pGP5G2)R		CTCCGCCACGTCCCATTTTGTGATGGGGGATCCACTAGTTCTAGAATCC	gibson pGP5G2-ZmTIR1/AFB3
3627	64_(ZmTIR1-AFB1)F		CCATCACAAAATGGGACGTGGCGGAGCGAGAGC	gibson pGP5G2-ZmTIR1/AFB2
3626	65_(ZmTIR1-AFB1)R		CTCCACCAGATCCCAGTATTTGTACGCAAGCAGGCGTGTCG	gibson pGP5G2-ZmTIR1/AFB1
3625	66_(3f6h)F		GCGTACAAATACTGGGATCTGGTGGAGATTACAAGG	gibson pGP5G2-ZmTIR1/AFB0
3624	59_(3F6H)R		GGGAGCCTGACATTCAATGGTGGTGATGATGGTGC	gibson pGP5G2-ZmTIR1/AFB1
3623	48_(pGP5G2-OsTIR1-FBOX)F	Romi	CACACCAGGTCTCAGATTCTATGTCAGGCTCCCTTATACACAGC	AFB23b1LRR
3622	49_(pGP5G2-OsTIR1-FBOX)R	Romi	CACACCAGGTCTCATTCCCGACAAACACACCCCTTC	AFB23b1LRR
3617	mScarlet end Fw seq		cctacaacgtcgaccgcaag	m
3602	50_(ZmAFB23b1-LRR)F	Romi	CACACCAGGTCTCAGGAACTGTTACGCCGTAAGACCG	AFB23b1LRR
3601	51_(ZmAFB23b1-LRR)R	Romi	CACACCAGGTCTCACCGCTTTGCAGAATCTTAACGAAATTGGGCG	AFB23b1LRR
3600	52_(flagtag)F	Romi	CACACCAGGTCTCAGCGGATCTGGTGGAGATTACAAGG	add flag tag gg
3599	53_(flagtag)R	Romi	CACACCAGGTCTCAAATCAATGGTGGTGATGATGGTGC	add flag tag gg
3598	38_(RICINUS)F	Romi	ACTAGTGGATCCCCCATCACAAAATGAACTACTTTCCTGACGAAGTGCTAGAACACG	ricin afb2
3597	39_(RICINUS)R	Romi	TGATCCTTGTAATCTCCACCAGATCCCAGCGTCCAAACAAAATCCGGCGC	ricin afb2
3596	40_(3flag6hisSTOP)F	Romi	GGATCTGGTGGAGATTACAAGG	add flag tag
3595	41_(3flag6hisSTOP)R	Romi	TGGCTGTGTATAAGGGAGCCTGACATAGAATCAATGGTGGTGATGATGGTGC	making pGP8GF
3594	42_(GRAPEa)F	Romi	ACTAGTGGATCCCCCATCACAAAATGAATTACTTCCCTGACGAGGTTTTGGAACATGTGT	grape afb2
3593	43_(GRAPEa)R	Romi	TGATCCTTGTAATCTCCACCAGATCCCAGTGTCCAGACGAAGTGTGGTGCA	grape afb2
3592	44_(POPLARa)F	Romi	ACTAGTGGATCCCCCATCACAAAATGAACTACTTCCCGGACGAGG	poplar afb2
3591	45_(POPLARa)R	Romi	TGATCCTTGTAATCTCCACCAGATCCCAAGGTCCAAACGAATTCAGGCG	poplar afb2
3590	46_(OsTIR1)F	Romi	ACTAGTGGATCCCCCATCACAAAATGGGGAGGGGCGGTTCCCGT	rice tir1(actual)
3589	47_(OsTIR1)R	Romi	TGATCCTTGTAATCTCCACCAGATCCAAGTCCGTGCATCTCCATATCTTGGA	rice tir1(actual)
3588	Level2_Rep_F	HG	GCGGCCGCTACGGTCTCAAATGGGATGCCAAAGAAGAAGAGAAAGGTCATGGTGAGCAAG
3587	Level2_Rep_R	HG	GCGGCCGCTACTCCTGAGACCATCTCTGATGCCGCATAGTTAAGCC
3586	prom_24_lose_AuxRE_rv		CCAATCCAATATCGACTTACCCGACTTC
3585	prom_24_lose_AuxRE_fw		GAAGTCGGGTAAGTCGATATTGGATTGG
3584	prom_27_lose_AuxRE_rv		CCAATCCAATATCGATGTTAATCGTTTTAGACG
3583	prom_27_lose_AuxRE_fw		CGTCTAAAACGATTAACATCGATATTGGATTGG
3582	pAT3G50060_seq_800		CGAAACCCGTAATCTCTACAG	Internal sequencing primers
3581	pAT3G50060_seq_1600		GTAGCACTAGGCAGTTTGAACC	Internal sequencing primers
3580	pAT5G09760_seq_800		GGTCCGAAAGTGTTAGTG	Internal sequencing primers
3579	pAT5G09760_seq_1600		GACCAGCTAGACTACAACGG	Internal sequencing primers
3578	pAT1G43910_seq_800		CGACATGTCTAAAATGACTGG	Internal sequencing primers
3577	pAT1G43910_seq_1600		GCCATGTGCACGACTCCAAAC	Internal sequencing primers
3576	pAT2G30490_seq_800		CCCAAAGTCCAAAACAATCGGC	Internal sequencing primers
3575	pAT3G61820_seq_800		CGCAGGTCGCAGGAATTGTC	Internal sequencing primers
3574	pAT3G61820_seq_1600		GATCAGACTCTGCGAAGATGGG	Internal sequencing primers
3573	pAT3G25710_seq_800		CCCAAAACCCTAGTTCATACCC	Internal sequencing primers
3572	pAT3G25710_seq_1600		GCATGTCAAATTGTGTAGGAGTG	Internal sequencing primers
3571	pAT3G54220_seq_800		GGGAAAAGATGAGGATGCAGATG	Internal sequencing primers
3570	mutate_second_BSA1_ARF5_Rv		CTGAGAGCTGACTCCCGCATATCGC
3569	mutate_second_BSA1_ARF5_Fw		GCGATATGCGGGAGTCAGCTCTCAG
3568	mutate_first_BSA1_ARF5_Rv		CTGGTCAAACTTGAGGCCGTTCAACTG
3567	mutate_first_BSA1_ARF5_Fw		CAGTTGAACGGCCTCAAGTTTGACCAG
3566	mutate_BSA1_ARF7_Rv		GCCCGTTGAGGCCAGGAGGC
3565	mutate_BSA1_ARF7_Fw		GCCTCCTGGCCTCAACGGGC
3564	Level_0_pAT3G25710_F		CACTCTGTGGTCTCAGGAGGGAGCAATATTCATGCATC
3563	Level_0_pAT3G25710_R		CACTTCGTGGTCTCACATTTTCATTGCGTACATTTTTTGG
3562	Level_0_pAT3G54220_F		CACTCTGTGGTCTCAGGAGTAGATTGTGATCCTCTGCAACAAAG
3561	Level_0_pAT3G54220_R		CACTTCGTGGTCTCACATTTTGGAGATTGAAGGGTTGTTGGTC
3560	AT3G50060_for_flanking		CCCTTGCTACCAAGAGAGCTCG
3559	AT3G50060_rev_flanking		CAATAGTCTCATCTTCCTCCGGCG
3558	AT5G09760_for_flanking		CGTCTGTGTATAAAGTGTAACCG
3557	AT5G09760_rev_flanking		GCGGTGAGGATGATGATGGAG
3556	mRFP Rv		cacttcgtggtctcaaagcttaggcgccggtggagtgg
3555	mRFP Fw		cactctgtggtctcaggtggcatggcctcctccgaggacg
3554	sYFP2 Rv		cacttcgtggtctcaaagcttacttgtacagctcgtccatgccgag
3553	sYFP2 Fw		cactctgtggtctcaggtggcatggtgagcaagggcgaggag
3552	mEGFP Rv		cacttcgtggtctcaaagcttacttgtacagctcgtccatgccg
3551	mEGFP Fw		cactctgtggtctcaggtggcatggtgagcaagggcgaggag
3550	mScarlet Rv		cacttcgtggtctcaaagcttacttgtacagctcgtccatgccg
3549	mScarlet Fw		cactctgtggtctcaggtggcatggtgagcaagggcgagg
3548	Nos terminator Rv		cacttcgtggtctcaagcgCTGTCGAGGGGGGATCAATTCC
3547	Nos terminator Fw		cactctgtggtctcagcttATCGTTCAAACATTTGGCAATAAAGTTTCTTAAG
3546	rbcST terminator Rv		cacttcgtggtctcaagcgGTTTGGGATGTTTTACTCCTCATATTAACTTCG
3545	rbcST terminator Fw		cactctgtggtctcagcttATTATGGCATTGGGAAAACTGTTTTTCTTG
3544	CaMV terminator Rv		cacttcgtggtctcaagcgCTGGTGATTTCAGCGTACCGAATTAATTCTC
3543	CaMV terminator Fw		cactctgtggtctcagcttGATGCCGACCGAACAAGAGCTG
3542	NTF_01_Linker_BLRP_pGbb_DR5_BirA_WPP_F	HG	CGAGCTGTACAAGGGAGGTGGACCAGGTGGTGGAATGGCTGGTGGACTTAACGATATC
3541	NTF_02_BLRP_pGbb_DR5_BirA_WPP_R	HG	CCTTGCTCACCATGGCAGCGGCCGCCTCAACC
3540	NTF_03_tdTomato_F	HG	GGCGGCCGCTGCCATGGTGAGCAAGGGCGAGGAGGT
3539	NTF_04_tdTomato_R	HG	CCTGGTCCACCTCCCTTGTACAGCTCGTCCATGCCGT
3538	Prom_01_NTF_pGbb_DR5_BirA_F	HG	GGAGAGGACAGCCCAGCTAAAGAAGATGAATCATTCAGCGAAAACCACACAGAACC
3537	Prom_02_NTF_pGbb_DR5_BirA_R	HG	CGATATCCTGCAGGCACTCCTGAGACCACAGAGTGTGGTGC
3536	Prom_04_UAS_R	HG	TCGCTGAATGATTCATCTTCTTTAGCTGGGCTGTCCTCTCC
3535	Fixer_F	HG	GAAAATGAAGGATAACACCGTGCCATT
3534	Fixer_R	HG	GTGTTATCCTTCATTTTCTGTAATTGTAATTGTAAATAG
3533	TPL_Delhelix_3-9bsaIR	ARL	atatatGGTCTCcctcccCCCAGATTCTTGTTCAAG	TPL Mutagenesis primer
3532	TPL_Delhelix_4-9bsaIR	ARL	atatatGGTCTCcctcccATTTCCATTGTGAACCTC	TPL Mutagenesis primer
3531	TPL_Delhelix_5-9bsaIR	ARL	atatatGGTCTCcctcccATTATCATCTACTTTAGTGAAAC	TPL Mutagenesis primer
3530	TPL_Delhelix_6-9bsaIR	ARL	atatatGGTCTCcctcccGGGACGATCATGCTTATC	TPL Mutagenesis primer
3529	TPL_Delhelix_7-9bsaIR	ARL	atatatGGTCTCcctcccATTAAAAGTTGAAAACACTTTCAAATC	TPL Mutagenesis primer
3528	TPL_Delhelix_8-9bsaIR	ARL	atatatGGTCTCcctcccGTCCCCATACTTGGATAAC	TPL Mutagenesis primer
3527	TPL_Delhelix_9bsaIR	ARL	atatatGGTCTCcctcccATTTCTAAGAGTAGGGAAC	TPL Mutagenesis primer
3526	TPL188_bsaI_R	ARL	atatatGGTCTCcctcccATTTTTACAAAGCTGGTGTTGC	TPL yeast construct cloning
35	Topo_seq_GW2	jt	GTTGCAACAAATTGATGAGCAATTA
34	Topo_seq_GW1	jt	GTTGCAACAAATTGATGAGCAATGC
33	BEH4_GG_Rv	al	cacttcgtggtctcacaccCCTGGTGCTTGAGTTTCCAAGAGTG
32	BEH4_GG_Fw	al	cactctgtggtctcaaatgACATCAGGGACGAGAATGCC
31	ARF19_GG_Rv	al	cacttcgtggtctcacaccTCTGTTGAAAGAAGCTGCAGCAGAAG
30	ARF19_GG_Fw	al	cactctgtggtctcaaatgAAAGCTCCATCAAATGGATTTCTTCC
29	ARF7_GG_rv	al	cacttcgtggtctcacaccCCGGTTAAACGAAGTGGCTGAGTTATC
28	ARF7_GG_Fw	al	cactctgtggtctcaaatgAAAGCTCCTTCATCAAATGGAGTTTCTC
27	ARF5_GG_Rv	al	cacttcgtggtctcacaccTGAAACAGAAGTCTTAAGATCGTTAATGCCTGC
26	ARF5_GG_Fw	al	cactctgtggtctcaaatgATGGCTTCATTGTCTTGTGTTGAAGACAAG
25	pBEH4_GG Rv	al	cacttcgtggtctcacattcactactctctgtttcttcttcctctgaaaactctctg
24	pBEH4_GG Fw	al	cactctgtggtctcaggaggatttcagtgaaaacttttttttttttttcagtgaaaac
23	pARF19_GG Rv	al	cacttcgtggtctcacattggtttatagaaagaacgaaaaaattggtttggtg
22	pARF19_GG Fw	al	cactctgtggtctcaggagccacgcgcagcaaatattg
21	pARF7_GG Rv	al	cacttcgtggtctcacattgatcactcaactttactttctctgaagaataaaccc
20	pARF7_GG Fw	al	cactctgtggtctcaggagaaaaaaaagctaggcgtcgaaatccataacttc
19	pARF5_GG Rv	al	cacttcgtggtctcacattacagagagatttttcaatgttctg
18	pARF5_GG Fw	al	cactctgtggtctcaggagtactatatatccacttataaattataatatgtttg
17	AGL42_GG Rv	al	cacttcgtggtctcacaccGCAGTTTCTATTTGGCAAACCGATGAATAAGTC
16	pAGL42_GG Fw	al	cactctgtggtctcaggaggcagtatttcgcttcgggagtcagaaag
15	PhyB3F	JZ LH	GATACGACCGTGTGATGGTG	genotyping
14	PhyB3F	JZ LH	GGTTGTTGCGGAGAGTAGGA	genotyping
13	PhyB3R	JZ LH	CGTGACGCTTGAGGAATATCA	genotyping
12	GCGACA_in_A1_Rv	al	GAAAACCAATCCAATATCGATGTCGCTACGTGGAGTCATTTGATATC
11	GCGACA_in_A1_Fw	al	GATATCAAATGACTCCACGTAGCGACATCGATATTGGATTGGTTTTC
10	CAGACA_in_A1_Rv	al	GAAAACCAATCCAATATCGATGTCTGTACGTGGAGTCATTTGATATCTAAAGTCTTC
9	CAGACA_in_A1_Fw	al	GAAGACTTTAGATATCAAATGACTCCACGTACAGACATCGATATTGGATTGGTTTTC
8	TGTCAT_in_A1_Rv	al	GAAAACCAATCCAATATCGAATGACATACGTGGAGTCATTTGATATCTAAAGTCTTC
7	TGTCAT_in_A1_Fw	al	GAAGACTTTAGATATCAAATGACTCCACGTATGTCATTCGATATTGGATTGGTTTTC
6	prom_28_ko_Rv	al	CCAATATCGATATCGCGGGATACGGGCAAACCGCGCTAC
5	prom_28_ko_Fw	al	GTAGCGCGGTTTGCCCGTATCCCGCGATATCGATATTGG
4	prom_27_ko_Rv	al	CCAATGAAAACCAATCCAATATCGATATCTGTGTTAATCGTTTTAGACG
3	prom_27_ko_Fw	al	CGTCTAAAACGATTAACACAGATATCGATATTGGATTGGTTTTCATTGG
2	prom_24_ko_Rv	al	AACCAATCCAATATCGAATGATACTTACCCGACTTCATAATC
1	prom_24_ko_Fw	al	GATTATGAAGTCGGGTAAGTATCATTCGATATTGGATTGGTT
#REF!	IAA3_bsaI_R	ARL	atatatGGTCTCcagaaTTATACACCACAGCCTAAACCTTTGGCT	TPL yeast construct cloning
#REF!	TPL188_bsaI_R	ARL	atatatGGTCTCcctccATTTTTACAAAGCTGGTGTTGC	TPL yeast construct cloning
#REF!	Level_0_extender	HG/Jackson	GAGTGCACCCACTYYGTG
#REF!	Level_0_pAT1G43910_F	HG/Jackson	CACTCTGTGGTCTCAGGAGCACTACACTAGTACCCTGCTAC
#REF!	Level_0_pAT5G26930_F	HG/Jackson	CACTCTGTGGTCTCAGGAGCATGAATAATCTTTGCGTACACC
#REF!	Level_0_pAT3G50060_F	HG/Jackson	CACTCTGTGGTCTCAGGAGCTCGAAAGTCTCGAATGATACAATG
#REF!	Level_0_pAT1G78270_F	HG/Jackson	CACTCTGTGGTCTCAGGAGGAGGAAACGCAAAACTCGGG
#REF!	Level_0_pAT5G09760_F	HG/Jackson	CACTCTGTGGTCTCAGGAGGAGTGGGTGAAATAACTATGC
#REF!	Level_0_pAT1G60710_F	HG/Jackson	CACTCTGTGGTCTCAGGAGGGAGGTTTATAGTTTCTCACAAGTG
#REF!	Level_0_pAT2G30490_F	HG/Jackson	CACTCTGTGGTCTCAGGAGGGTCCCAAGTAAGAAAAGCCC
#REF!	Level_0_pAT3G61490_F	HG/Jackson	CACTCTGTGGTCTCAGGAGGGTTTAACACATTCTCATTCC
#REF!	Level_0_pAT3G61820_F	HG/Jackson	CACTCTGTGGTCTCAGGAGGTTTCCATACGTAACAGGGAAATG
#REF!	Level_0_pAT5G26930_R	HG/Jackson	CACTTCGTGGTCTCACATTTTCAATCTTAGTTCTTAGAGTTCC
#REF!	Level_0_pAT1G78270_R	HG/Jackson	CACTTCGTGGTCTCACATTTTCCTTTTGACGATGACGATGATG
#REF!	Level_0_pAT3G50060_R	HG/Jackson	CACTTCGTGGTCTCACATTTTCGCCATTGAAACAGATCTTTTG
#REF!	Level_0_pAT1G60710_R	HG/Jackson	CACTTCGTGGTCTCACATTTTGAATCTCTCTGTCACAACTATCTC
#REF!	Level_0_pAT3G61820_R	HG/Jackson	CACTTCGTGGTCTCACATTTTGCGCTCCATTGGAAATGAAAATATG
#REF!	Level_0_pAT2G30490_R	HG/Jackson	CACTTCGTGGTCTCACATTTTGTCCATTATAGTTTGTGTATCCGC
#REF!	Level_0_pAT3G61490_R	HG/Jackson	CACTTCGTGGTCTCACATTTTTAGAGACATATCCTTATTATACTAGC
#REF!	Level_0_pAT5G09760_R	HG/Jackson	CACTTCGTGGTCTCACATTTTTAGAGACGAATGTGTGTGTA
#REF!	Level_0_pAT1G43910_R	HG/Jackson	CACTTCGTGGTCTCACATTTTTTGTGCTTAAGAGAAGAAGG
#REF!	mutated E1 in SAUR15_max_Rv	al	ctttttaattacagagcacagctttgggttgtagatactaaacc
#REF!	mutated E1 in SAUR15_max_Fw	al	ggtttagtatctacaacccaaagctgtgctctgtaattaaaaag
#REF!	mutated E1 in SAUR15_minimal_Rv	al	CAATATCGAgagcacagctttgggttgtagatac
#REF!	mutated E1 in SAUR15_minimal_Fw	al	gtatctacaacccaaagctgtgctcTCGATATTG
#REF!	mutated A2 in SAUR15 Rv	al	ccaagaacaaatcaataaatggtgagaagttagtgtctaatg
#REF!	mutated A2 in SAUR15 Fw	al	cattagacactaacttctcaccatttattgatttgttcttgg
#REF!	ACTMED13_GSlink_F	ARL	ggatctggatctggctctATGTGGACTAATGTTTTCAG	MED13 Mutagenesis
#REF!	TPL188_ExpF	ARL	aaaacctctacttccaatcGATGTCTTCTCTTAGTAGAGAGCTCG	TPL Ecoli Expression
#REF!	TPL188_ExpR	ARL	ccacactcatcctccggTTATTACTAATTTTTACAAAGCTGGTGTTG	TPL Ecoli Expression
#REF!	FKBP1_F2	ARL	GGTCGACGGATCCCCGGGTT	Anchor Away Genotyping
#REF!	FKBP1_R1	ARL	TCGATGAATTCGAGCTCGTT	Anchor Away Genotyping
#REF!	RPL13A_F1	ARL	AAATGGTAAGGCCCCAGAAG	Anchor away cloning
#REF!	RPL13A_F2	ARL	AACTATCGGTATCGCCGTTG	Anchor away cloning
#REF!	RPL13A_R1	ARL	TAAGTGATGGCTTCCCGTTT	Anchor away cloning
#REF!	RPL13A_R2	ARL	GTTGTGCTCGAAGGAAAAGC	Anchor away cloning
#REF!	TPL202_R	ARL	ccacactcatcctccggTTATTActaGTGATCCACAAAAAGAGTCTTGA	TPL Ecoli Expression
3423	TIR1g1	Romi	ATATATGGTCTCGATTGAGCCTTGTCGTTTCCAGAAGGTTTTAGAGCTAGAAATAGC	CRISPR guides revisited
3422	TIR1g2	Romi	ATTATTGGTCTCGAAACCTGTTCGGTATATGAAGACTAATCTCTTAGTCGACTCTAC	CRISPR guides revisited
3421	AFB1g1	Romi	atatatggtctcgattgCCAACACCTTAGGTGGGAATgttttagagctagaaatagc	CRISPR guides revisited
3420	AFB1g2	Romi	atattattggtctcaagatgTGTATCGTCCACACAAATTCgttttagagctagaaatagc	CRISPR guides revisited
3419	AFB3g3	Romi	atattattggtctcAGTGATGGATGAATTATTTCCCAGACGgttttagagctagaaatag	CRISPR guides revisited
3418	AFB3g4	Romi	attattggtctctaaacCTGTTCGGTAGAGGTAAAGTcaatcactacttcgactctagct	CRISPR guides revisited
3417	AFB4g1	Romi	atatatggtctcgattgTAGCTCAGCTAAAATGTCAGgttttagagctagaaatagc	CRISPR guides revisited
3416	AFB4g2	Romi	atattattggtctcaagatgATCCCTTGATGGCCCAAGGAgttttagagctagaaatagc	CRISPR guides revisited
3415	AFB5g3	Romi	atattattggtctcAGTGATGTGACCAACAATCTCCACCGTgttttagagctagaaatag	CRISPR guides revisited
3414	AFB5g4	Romi	attattggtctctaaacCGTTCTATAAAATCGTGACGcaatcactacttcgactctagct	CRISPR guides revisited
3413	AFB5 guide 1	Romi	ATATATGGTCTCGATTGGTAGAGGGTAGATCCAACGGGTTTTAGAGCTAGAAATAGC	CRISPR guides maizefboxes revisited
3412	AFB5 guide 2	Romi	ATTATTGGTCTCGAAACGCGCATGACTAATGCCGCTGAATCTCTTAGTCGACTCTAC	CRISPR guides maizefboxes revisited
#REF!	ZmARF29 with Kozak Rv		ctgcgaggaggccatCATtttctagaTGTATATGAGATAG
#REF!	ZmARF29 with Kozak Fw		CTATCTCATATACAtctagaaaATGatggcctcctcgcag
#REF!	ZmARF27 with Kozak Rv		CTTCATTCTAGATGTATATGAGATAGTTGATTTctagaTGTATATGAGATAGTTGATTG
#REF!	ZmARF27 with Kozak Fw		CAATCAACTATCTCATATACAtctagAAATCAACTATCTCATATACATCTAGAATGAAG
#REF!	ZmARF4 with Kozak Rv		CCTTCTCGTACGAGGACGTCATCATtttctagaTGTATATGAGATAGTTG
#REF!	ZmARF4 with Kozak Fw		CAACTATCTCATATACAtctagaaaATGATGACGTCCTCGTACGAGAAGG
3398	BrNIR_R3	lh	ATGCTCTCTCCAGCTTACCG
3397	BrNIR_F3	lh	AGCTATTCCCCTCGATGCTT
3396	BrNIR_R2	lh	CGAGTCGCTTCCTATTCGTC
3395	BrNIR_F2	lh	TATCGGATTCATGGGATGCT
3394	BrNIR_R1	lh	AGCTTCGGTTTTGGAGGTTT
3393	BrNIR_F1	lh	CTCGGTTAGCTGACGCCTAC
3392	BrGAD4_R3	lh	GGCATTGTATATGCAGGCACT
3391	BrGAD4_F3	lh	TGTGATGGAGAACTGCAGAGA
3390	BrGAD4_F2	lh	CATCAACGGCTGGAAGAAGT
3389	BrGAD4_R1	lh	TTCAAATCTCCGAATCAATGC
3388	BrGAD4_F1	lh	GATGGTGACGGTGAAGAAA
3387	BrNRT1.12_R3	lh	TAGCAGTTGCGTTGTCCTTG
3386	BrNRT1.12_F3	lh	CATCCTCCCATTAGCTTCCA
3385	BrNRT1.12_R2	lh	GACCATCCGAACCAATGTCT
3384	BrNRT1.12_F2	lh	TTGCAGCTTACGTGAACAGG
3383	BrNRT1.12_R1	lh	TGGAAGCTAATGGGAGGATG
3382	BrNRT1.12_F1	lh	GACAGACGTTTGAGCAACGA
3381	BrNRT1.6_R3	lh	GCAACGATCATGGAGAGGAT
3380	BrNRT1.6_F3	lh	ATAGGCCCCAACTTCGAGAT
3379	BrNRT1.6_R2	lh	ACACCCAAAACCGCTATCAG
3378	BrNRT1.6_F2	lh	TGATTGTGACGACGGTTCAT
3377	BrNRT1.6_R1	lh	GAATCTCCAGCGTTGATGCC
3376	BrNRT1.6_F1	lh	ATTCTTCCGTCGGATCACCG
3375	BrCAB_B_R3	lh	ACCGTTCTTGAGCTCCTTCA
3374	BrCAB_B_F3	lh	GTTTGACCCGTTGAACTTGG
3373	BrCAB_B_R2	lh	CCACGCACATTAAAGCAAGA
3372	BrCAB_B_F2	lh	GCTAACAATGCCTGGGCTTA
3371	BrCAB_B_R1	lh	CCGCAACATGATCAAACAAG
3370	BrCAB_B_F1	lh	CGGCTTGCCATGTTCTCTAT
3369	BrCAB_A_F3	lh	GCCTCATCGAAGGGTACAGA
3368	BrCAB_A_R2	lh	TAATCGAGGCCTCCTTCTGA
3367	BrCAB_A_F2	lh	CGGAGTCAAATTCGGAGAAG
3366	BrCAB_A_R1	lh	CGTTCTTGAGCTCCTTCACC
3365	BrCAB_A_F1	lh	AGAATCGGAGGTGGTCCTCT
3364	BrSAG12_B_R3	lh	CAGAGGTTAAGCCGCCAATA
3363	BrSAG12_B_F3	lh	GCTGTTGCGGCTATAGAAGG
3362	BrSAG12_B_R1	lh	CCCCGTGATCAAGATGAGTT
3361	BrSAG12_B_F1	lh	AGCGGGAGGAGATATTGGTT
3360	BrSAG12_A_R3	lh	GGTAAACACACCGGACGAGT
3359	BrSAG12_A_R2	lh	GCCACTGCCTTCATTAGAGC
3358	BrSAG12_A_F2	lh	TGGATACTGCGTTTGAGCAC
3357	BrSAG12_A_R1	lh	CCGGACGAGTAGAATTGGAA
3356	BrSAG12_A_F1	lh	CTAATGAAGGCAGTGGCACA
3355	BrPRIN2_R3	lh	GATTTGAGGTTCGGGTGCTA	Brapa senescence experiment
3354	BrPRIN2_F3	lh	GAGCGAGTATGGAGGACCTG	Brapa senescence experiment
3353	BrPRIN2_F2	lh	CCTGGAACACTCTTGGTCGT	Brapa senescence experiment
3352	BrPRIN2_R1	lh	CTAATCAGTGCCGGTCCATT	Brapa senescence experiment
3351	BrPRIN2_F1	lh	CGAGTATGGAGGACCTGGAA	Brapa senescence experiment
3350	AFB2/3-like b1 F	Romi	CACACCAGGTCTCAAATGACGTATTTCCCAGAAGAAGTCG	goldengate PCRs for AFB2/3-like b1 into pGP5G2
3349	AFB2/3-like b1 R	Romi	CACACCAGGTCTCAAGAACTAGCTTTGCAGAATCTTAACGAAATTGGGC	goldengate PCRs for AFB2/3-like b1 into pGP5G2
3348	AFB2/3-like b2 F	Romi	CACACCAGGTCTCAAATGACATACTTCCCGGGCGAGGTCG	goldengate PCRs for AFB2/3-like b2 into pGP5G2
3347	AFB2/3-like b2 R	Romi	CACACCAGGTCTCAAGAACTACAGTATCTGTACAAAGTTAGGGGCATCG	goldengate PCRs for AFB2/3-like b2 into pGP5G2
3346	AFB2/3-like a F	Romi	CACACCAGGTCTCAAATGGCGTACTTTCCAGACGAAGTAGTTGGGT	goldengate PCRs for AFB2/3-like a into pGP5G2
3345	AFB2/3-like a R	Romi	CACACCAGGTCTCAAGAATCATAGAATACTCACGAACCCAGGGG	goldengate PCRs for AFB2/3-like a into pGP5G2
3344	TIR1/AFB1-1 F	Romi	CACACCAGGTCTCAAATGATGGGACGTGGCGGAGCG	goldengate PCRs TIR1/AFB1-like into pGP5G2
3343	TIR1/AFB1-1(A) R	Romi	CACACCAGGTCTCAACTAGACGTAGCACCTGAAAATTACGAAAAGATGC	goldengate PCRs TIR1/AFB1-like into pGP5G2
3342	TIR1/AFB1-2 F	Romi	CACACCAGGTCTCATAGTCTCTTGTGAGGGCTTTTCTACGGCG	goldengate PCRs TIR1/AFB1-like into pGP5G2
3341	TIR1/AFB1-2(A)-3(A) R	Romi	CACACCAGGTCTCACTCATGGTTTCTAATTTAGCCGCATTAGCTAACAACGGTTTGTCC	goldengate PCRs TIR1/AFB1-like into pGP5G2
3340	TIR1/AFB1-4 F	Romi	CACACCAGGTCTCATGAGATCTCTATGGATGAGTACCTGCTCAATGACCC	goldengate PCRs TIR1/AFB1-like into pGP5G2
3339	TIR1/AFB1-4 R	Romi	CACACCAGGTCTCAAGAATTACAGTATTTGTACGCAAGCAGGC	goldengate PCRs TIR1/AFB1-like into pGP5G2
3338	BrPAP1_F1	lh	GCCGGAGAACAAGACTGAAG	Brapa senescence experiment
3337	AGL42 guide mid-gene Rv	al	ATTATTGGTCTCGAAACGGCCCTTTTTTGTCCATTTACAATCTCTTAGTCGACTCTAC
3336	AGL42 guide Rv	al	ATTATTGGTCTCGAAACTGGAGAGGATCATCGACTGACAATCTCTTAGTCGACTCTAC
3335	AGL42 guide Fw	al	ATATATGGTCTCGATTGGTATGTGGGGAGGAGAAGATAGTTTTAGAGCTAGAAATAGC
3334	(OsTIR1-1-noATG)F	Romi	CACACCAGGTCTCAAATGACCTATTTCCCTGAGGAGGTAGTCG	goldengate PCRs for OsTIR1 into pGP5G2
3333	(OsTIR1-1-noATG)_(A)R	Romi	CACACCAGGTCTCAGTTTCGTACCTGGCGAAGTTCCC	goldengate PCRs for OsTIR1 into pGP5G2
3332	(OsTIR1-2)F	Romi	CACACCAGGTCTCAAAACCATGAGAAGCCTATGGATGTCTTCATGC	goldengate PCRs for OsTIR1 into pGP5G2
3331	(OsTIR1-2)R	Romi	CACACCAGGTCTCAAGAACTATAGAATTTTAACGAAATTTGGCGCATCG	goldengate PCRs for OsTIR1 into pGP5G2
3330	BEH4 guide Rv	al	ATTATTGGTCTCGAAACCCATGTCGGCATTCTCGTCCAATCTCTTAGTCGACTCTAC
3329	BEH4 guide Fw	al	ATATATGGTCTCGATTGGGGCTAGTGAAAGCATGGGAGTTTTAGAGCTAGAAATAGC
3316	ACTMED13_GSlink_F	ARL	ggatctggatctggctctATGTGGACTAATGTTTTCAG	MED13 - TPL Y2H
3315	MED13Del_Itocdna_R	ARL	CCTGGCATCCGTCCAGAT	MED13 - TPL Y2H
3314	MED13Del_Itocdna_F	ARL	GTTCTGCAGCAGGGATGTC	MED13 - TPL Y2H
3313	Level_0_At5g01747_R	HG	CACTTCGTGGTCTCACATTAATGCACGTGCCCTGCTTCTCC
3312	Level_0_S17_R	HG	CACTTCGTGGTCTCACATTAATGACCGGTTTAAAATTGTTTAATTAGAGAGA
3311	Level_0_S17_F	HG	CACTCTGTGGTCTCAGGAGTCTGGATTAGCGACTAAGGCTATTACTCG
3310	Level_0_UAS_R	HG	CACTTCGTGGTCTCACATTAGCTGGGCTGTCCTCTCCAAA
3309	Level_0_UAS_F	HG	CACTCTGTGGTCTCAGGAGTGCCTGCAGGATATCGGGTGACA
3308	Level_0_ATHB_F	HG	CACTCTGTGGTCTCAGGAGATGGCCTGCAACTGTACGGA
3307	Level_0_ATHB_R	HG	CACTTCGTGGTCTCACATTTCCTCCCATCTTTGATCCTCTCCGA
3306	41_Green_DR5_F	HG	GGAGTAAAACATCCCAAACGTAATACGGTTATCCACAGAATCAGGGG
3305	42_Green_DR5_R	HG	GCACGGTGTTATCCTTCATCCCCTGTAATTGTAATTGTAAATAGTAATTGTAATG
3304	43_BirA_Term_F	HG	CAATTACAATTACAGGGGATGAAGGATAACACCGTGCC
3303	44_BirA_Term_R	HG	CGCCCTGACGGGCTTAGACATAGATGACACCGCGCG
3302	45_Cell_Prom_F	HG	GGTGTCATCTATGTCTAAGCCCGTCAGGGCGCGT
3301	46_Cell_Prom_R	HG	CGCTGAATGATTCATCTTCGTGGTCTCACATTTTGTATATTTCTCTCTTCA
3300	47_Tom_F	HG	CAAAATGTGAGACCACGAAGATGAATCATTCAGCGAAAACCACACAGAACCG
3299	48_Tom_R	HG	AATGCCATAATGTGGTCTCAACCTCCAGATCCACC
3298	49_terminal_F	HG	GGAGGTTGAGACCACATTATGGCATTGGGAAAACTGTTTTTCTTGTACC
3297	50_terminal_R	HG	GATAACCGTATTACGTTTGGGATGTTTTACTCCTCATATTAACTTCGG
3296	OsTIR1MYC-1-noATG F	Romi	CACACCAGGTCTCAAATGACGTACTTCCCGGAGGAGG	goldengate PCRs for OsTIR1-MYC into pGP5G2
3295	OsTIR1MYC-1-noATG R	Romi	CACACCAGGTCTCAAGAATTAGCTAGTGGATCCGTTCAAGTCTTCTTCTG	goldengate PCRs for OsTIR1-MYC into pGP5G2
3294	AFB2/3_b1_mid_F	Romi	GGTTGCACGTAGCCCCAACC	AFB2/3 b1 internal primer for sequencing
3293	AFB2/3_b2_mid_F	Romi	GGTCGCTAAATCACCTAACC	AFB2/3 b2 internal primer for sequencing
3292	AFB2/3_a_mid_F	Romi	ATTGGTCGCGCGTTCACCAA	AFB2/3 a internal primer for sequencing
3291	TIR1/AFB1_mid_F	Romi	AAATTTCTCATGCCTAGAGG	TIR1/AFB1 internal primer for sequencing
3290	OsTIR1_mid_F	Romi	ACTGGTTAGTAGGTCACCAA	OsTIR1 internal primer for sequencing
3289	27_Aux_PromoterF	HG	CTTGTTGCCTGGCCGTTAACGCTTTCATAGTGGTCTCACATTCTAGTGGATCCCC
3288	28_Aux_PromoterR	HG	CAGCCGAACGACCGAGCGCGGTACCAAGAGCAGATTGTACTGAGAGTGCACC
3287	29_pgreen_Dr5F	HG	CTTGTTGCCTGGCCGTTAACGCTTTCATACTAGTGGATCCCCTGTAATTGTAATTGT
3286	30_pgreen_Dr5R	HG	CAGCCGAACGACCGAGCGCGGTACCACTCGAGGTCGACGGTATCGA
3285	Cleavage_signal_R	HG	GGGCCCAGGGTTGGACTCGACG
3284	XVE_internal_F	HG	TGCCTTGTTGGATGCTGAGCCC
3283	LexA_internal_F	HG	TCGCATTATCATCCCCTCGACGTACT
3282	CreA_internal_F	HG	TGGATTTCTGTATCTGGTGTGGCTGATGA
3281	Tomato_internal_F	HG	CGCCACCACCTGTTCCTGGGGCATG
3280	Tomato_internal_R	HG	CATGTTGTTGTCCTCGGAGGAGGCGG
3279	21_pGreen_backboneF	HG	CGCAAACTAGGATAAATGCCCGCTTTCCAGTCGGG
3278	22_pGreen_backboneR	HG	ACGCGCCCTGAGACTTTTCAACAAAGGGTAATTTCGGG
3277	23_Promoter_L0F	HG	CCTTTGTTGAAAAGTCTCAGGGCGCGTCAGCGGGTGTTGG
3276	24_Promoter_L0R	HG	CCTTTCTCTTCTTCTTTGGACTTCGTGGTCTCACATTTCTTCTCTTTCTCCACC
3275	25_tomato_terminalF	HG	TGTGAGACCACGAAGTCCAAAGAAGAAGAGAAAGGTCATGGTG
3274	26_tomato_terminalR	HG	CCGACTGGAAAGCGGGCATTTATCCTAGTTTGCGCGCTATATTTTG
3273	pGreen_DR5_F	HG	ACGGTATCGATAAGCTTGATATCG
3272	pGreen_DR5_R	HG	CTAGTGGATCCCCTGTAATTGTA
3271	AFB2/3_b1_F	Romi	ATGACGTATTTCCCAGAAGAA	regular gene primer and PCR primer to insert into pCR8
3270	AFB2/3_b1_R	Romi	ATTTCGTTAAGATTCTGCAAAG	regular gene primer and PCR primer to insert into pCR8
3269	AFB2/3_b2_F	Romi	ATGACATACTTCCCGGGC	regular gene primer and PCR primer to insert into pCR8
3268	AFB2/3_b2_R	Romi	CTACAGTATCTGTACAAAGTTAGGGG	regular gene primer and PCR primer to insert into pCR8
3267	AFB2/3_a_F	Romi	ATGGCGTACTTTCCAGACG	regular gene primer and PCR primer to insert into pCR8
3266	AFB2/3_a_R	Romi	TCATAGAATACTCACGAACCCA	regular gene primer and PCR primer to insert into pCR8
3265	TIR1/AFB1_F	Romi	ATGGGACGTGGCGG	regular gene primer and PCR primer to insert into pCR8
3264	TIR1/AFB1_R	Romi	TTACAGTATTTGTACGCAAGCA	regular gene primer and PCR primer to insert into pCR8
3263	OsTIR1_F	Romi	ATGACCTATTTCCCTGAGGA	regular gene primer and PCR primer to insert into pCR8
3262	OsTIR1_R	Romi	CTATAGAATTTTAACGAAATTTGGC	regular gene primer and PCR primer to insert into pCR8
3261	gg_AFB2/3_b1_F	Romi	ATATATGGTCTCGaatgACGTATTTCCCAGAAGAAGTC	pCR-BLUNT-Maizefbox turned gg compatible pCR prod
3260	gg_AFB2/3_b1_R	Romi	ATTATTGGTCTCGagaaCTAGCTTTGCAGAATCTTAACG	pCR-BLUNT-Maizefbox turned gg compatible pCR prod
3259	gg_AFB2/3_b2_F	Romi	ATATATGGTCTCGaatgACATACTTCCCGGGCG	pCR-BLUNT-Maizefbox turned gg compatible pCR prod
3258	gg_AFB2/3_b2_R	Romi	ATTATTGGTCTCGagaaCTACAGTATCTGTACAAAGTTAGGGG	pCR-BLUNT-Maizefbox turned gg compatible pCR prod
3257	gg_AFB2/3_a_F	Romi	ATATATGGTCTCGaatgGCGTACTTTCCAGACGAAGT	pCR-BLUNT-Maizefbox turned gg compatible pCR prod
3256	gg_AFB2/3_a_R	Romi	ATTATTGGTCTCGagaaTCATAGAATACTCACGAACCCA	pCR-BLUNT-Maizefbox turned gg compatible pCR prod
3255	gg_TIR1/AFB1_F	Romi	ATATATGGTCTCGaatgGGACGTGGCGGAGC	pCR-BLUNT-Maizefbox turned gg compatible pCR prod
3254	gg_TIR1/AFB1_R	Romi	ATTATTGGTCTCGagaaTTACAGTATTTGTACGCAAGCAGG	pCR-BLUNT-Maizefbox turned gg compatible pCR prod
3253	gg_OsTIR1_F	Romi	ATATATGGTCTCGaatgACCTATTTCCCTGAGGAGGT	pCR-BLUNT-Maizefbox turned gg compatible pCR prod
3252	gg_OsTIR1_R	Romi	ATTATTGGTCTCGagaaCTATAGAATTTTAACGAAATTTGGC	pCR-BLUNT-Maizefbox turned gg compatible pCR prod
3251	ga20ox1_del_F	arl/oao	ATATATGGTCTCGATTGAGAGAGGCATATCAAAGAAGGTTTTAGAGCTAGAAATAGC	ga20ox1 crispr mutation
3250	ga20ox1_del_R	arl/oao	ATTATTGGTCTCGAAACTCCTCCACTTTAGATGCTTCAATCTCTTAGTCGACTCTAC	ga20ox1 crispr mutation
3249	ga20ox1_3_F	arl/oao	ATATATGGTCTCGATTGAGAGAGGCATATCAAAGAAGGTTTTAGAGCTAGAAATAGC	ga20ox1/ga20ox3 crispr mutation
3248	ga20ox1_3_R	arl/oao	ATTATTGGTCTCGAAACCTCCAAGTCCCACTCATAGAAATCTCTTAGTCGACTCTAC	ga20ox1/ga20ox3 crispr mutation
3247	UBQ10_qPCR_R	MMTT	AAAGAGATAACAGGAACGGA
3246	UBQ10_qPCR_F	MMTT	GGCCTTGTATAATCCCTGAT
3245	mTurq_qPCR_R	MMTT	gtgttctgctggtagtggt
3244	mTurq_qPCR_F	MMTT	agcgacaacgtctatatcacc
3243	ACTMED13_GSlink_F	arl	ggatctggatctggctctATGTGGACTAATGTTTTCAG	AtMED13 Cloning primer
3242	ACTMED13_GSlink_R	arl	tgatcctgagccactgccGCTAGCGTAATCTGGAAC	AtMED13 Cloning primer
3241	MED13_C968_F	arl	GTTTTTCCTTCGTCTGTCATTAC	AtMED13 Cloning primer
3240	MED13_N968_R	arl	CATAAGGGCGAATTCGGAG	AtMED13 Cloning primer
3239	MED13_N967_F	arl	TAAAGGGCGAATTCGACC	AtMED13 Cloning primer
3238	MED13_N967_R	arl	CTCAGCAGAGAGTGGATC	AtMED13 Cloning primer
3229	TPL_tetratripmut_F	arl	gacattgtctAACTTCCGGGAGAATGAAC	TPL Mutagenesis primer
3228	TPL_tetratripmut_R	arl	aagagagaagcTATTTCCTTGAAAAGCTCC	TPL Mutagenesis primer
3227	TPL_K102A_F	arl	GAAGGATTTGgctGTGTTTTCAACTTTTAATG	TPL Mutagenesis primer
3226	TPL_K102A_R	arl	ACTAGTATATCCACAGCC	TPL Mutagenesis primer
3225	change SAUR15 TATAAAAA Rv	al	tttttataggggtttagttacttgttatataaacgaacgtatgaaag
3224	change SAUR15 TATAAAAA Fw	al	tataaaaatttagattcacaaactaaagaagatccaattttaaaatctca
3223	change pIAA19 TATA box Rv	al	CCGCGTCGTGCTTTATATATGTTGCTTCG
3222	change pIAA19 TATA box Fw	al	CGAAGCAACATATATAAAGCACGACGCGG
3221	promoter 28 CC	al	TCAAATGACTCCACGTAGCGCGGTTTGCCCGTATCCCCCGACATCGATATTGG
3220	promoter 27 CC	al	TCAAATGACTCCACGTACTCGTCTAAAACGATTAACACCGACATCGATATTGGATTGGTT
3219	promoter 24 GG	al	TCAAATGACTCCACGTATGATTATGAAGTCGGGTAAGTGTCGGTCGATATTGGATTGGTT
3218	promoter 36_GG_CC	al	TCAAATGACTCCACGTATCTACGCGTTGTCGGGCTTTCCGACATCGATATTGGATTGGTT
3217	promoter 12_last 9 bp	al	TATCAAATGACTCCACGTATAACCCGGATCGATATTGGATTGGTTTTCATTGGTTGTATC
3216	promoter 12_middle 8 bp	al	TATCAAATGACTCCACGTAAGGCTAGCTCGATATTGGATTGGTTTTCATTGGTTGTATC
3215	promoter 12_first 9 bp	al	TATCAAATGACTCCACGTAGGCCAGGCTTCGATATTGGATTGGTTTTCATTGGTTGTATC
3214	j5_00013_06_CYC_TermF	HG	ACCCTTTGTTGAAAAGTCTCATATAATGTTACATGCGTACACGCG
3213	j5_00014_06_CYC_Term_05_RelinkerR	HG	AGTTTGAAAAATGAGAGCTCCTCGAGTAGTAAGCCGCATCATGTAATTAGTTATGTCACG
3212	j5_00015_04_CleavageF	HG	GCGGCTTACTACTCGAGGAGCTCTCATTTTTCAAACTGAGG
3211	j5_00016_04_CleavageR	HG	AGATGGTGATCCCCTCGAGGGAGGATCTAAGTTTGC
3210	j5_00017_03_CreAF	HG	ATCCTCCCTCGAGGGGATCACCATCTTCCAAGAGTCT
3209	j5_00018_03_CreAR	HG	GAAGCTAGTCGACTCTAGCAGCCATGGAAAAAAATGTCT
3208	j5_00019_02_XVE_LEXAF	HG	TCCATGGCTGCTAGAGTCGACTAGCTTCAGCGTGTCCTCT
3207	j5_00022_pGreen_BackboneR	HG	CGTGTACGCATGTAACATTATATGAGACTTTTCAACAAAGGGTAATTTCGGG
3206	j5_00023_02_XVE_LEXA_01_Promoter_overhang_kpn1R	HG	AACGACCGAGCGCGGTACCAGGAGTGAGACCGTTTAAACGGTCTCAAATTATGAAAGCGTTAACGGCCAGGCAACA
3205	j5_00024_pGreen_BackboneF	HG	CACTCCTGGTACCGCGCTCGGTCGTTCGGCTG
3204	j5_2_00001_pUbi1F	HG	ACGTTATATCGATTCGGTACCATTTTGTAATATCCCGGGATATTTCACA
3203	j5_2_00002_pUbi1_Lox2272R	HG	GAGAAAAAGATTAGTCTTCATATAACTTCGTATAAAGTATCCTATACGAAGTTATCTTTTGTGTTTCGTCTTCTCTCACGT
3202	j5_2_00003_apGFPF	HG	GGATACTTTATACGAAGTTATATGAAGACTAATCTTTTTCTCTTTCTCATC
3201	j5_2_00004_apGFPR	HG	GGGATTCTTGATAAGAGTCTCTTTTGTATAGTTCATCCATGCCATGTG
3200	j5_2_00005_Ubi_termF	HG	GGCATGGATGAACTATACAAAAGAGACTCTTATCAAGAATCCCATCTCTTGC
3199	j5_2_00006_Ubi_term_Lox2272R	HG	CCTTTCTCTTCTTCTTTGGATAACTTCGTATAAAGTATCCTATACGAAGTTATCATTTGTTTGTCTTTAACAACGGCTCACAACCTGT
3198	j5_2_00007_NLS_TomatoF	HG	GGATACTTTATACGAAGTTATCCAAAGAAGAAGAGAAAGGTCATGGTGAGC
3197	j5_2_00008_NLS_TomatoR	HG	GGGATTCTTGATAAGAGTCTCTCTACTTGTACAGCTCGTCCATGCCG
3196	j5_2_00009_Term_Ubi1F	HG	CGAGCTGTACAAGTAGAGAGACTCTTATCAAGAATCCCATCTCTTGC
3195	j5_2_00010_Term_Ubi1R	HG	CTGGAAAGCGGGCCATTTGTTTGTCTTTAACAACGGCTCACAACCTGT
3194	j5_2_00011_backboneF	HG	GTTAAAGACAAACAAATGGCCCGCTTTCCAGTCGGGA
3193	j5_2_00012_backbone_KPNR	HG	CGGGATATTACAAAATGGTACCGAATCGATATAACGTTACACCACAATATATCCTGCCA
3192	SHP2 qPCR Rv	al	TCGATTCTTGTTGCTGTAGACCTG
3191	SHP2 qPCR Fw	al	TCGTGTCCGATCCAAGAAGCAC
3190	SHP1 qPCR Rv	al	CCACCTTCCTCCATTGATCCTGAG
3189	SHP1 qPCR Fw	al	AAGCAGCAGTTAAGTGGTACTGAG
3188	AGL24 qPCR Rv	al	AGATCCTCTCCTCTCAGTTTCCG
3187	AGL24 qPCR Fw	al	TGGATCCACCTTCTACTCATCTCC
3186	AGL20 qPCR RV	al	TGCTGACTCGATCCTTAGTATGCC
3185	AGL20 qPCR Fw	al	TTCGCCAGCTCCAATATGCAAG
3184	AGL42 qPCR Rv	al	GCGTTCGATCGTCTTCTGCATATC
3183	AGL42 qPCR Fw	al	TCATCTTCTCCCAGAGAGGAAGGC
3182	SVP qPCR Rv	al	TCTCTAACCACCATACGGTAAGCC
3181	SVP qPCR Fw	al	AACGCTGCTGTGTACGAGGAAG
3180	BIF4-GG_R	MMTT	TTTTTTTTTGGTCTCAtctcCTAAGCTGCAGCTCTCTTCCTGG	golden gate of pIAA28::BIF4 into pGrnH
3179	IAA28-GG_R	MMTT	TTTTTTTTTGGTCTCAtctcttaTTCCTTGCCATGTTTTCTAGGTGA	golden gate of pIAA28::IAA28 into pGrnH
3178	IAA28p-GG_F	MMTT	TTTTTTTTGGTCTCAcccttgaaagaaaatatatttttaaacgta	golden gate of pIAA28::IAA28 into pGrnH
3177	TPL_5G2_BsaIF	ARL	atatatggtctcgaatgtctagaactagtggatccccc	TPL yeast construct cloning
3176	IAA3_5G2_BsaIR1	ARL	atatatggtctccagaaTcatACACCACAGCCTAAACCT	TPL yeast construct cloning
3175	TPL_delto188F	ARL	GGTGGACCAGGTGGTGGA	TPL Mutagenesis primer
3174	TPL_delto188R	ARL	ATTTTTACAAAGCTGGTGTTGCCAATTTAAG	TPL Mutagenesis primer
3172	ZmARF4_3		TCAAATGACTCCACGTAtcacgcatgaaattcataccgacttgTCGATATTGGATTGGTT
3171	ZmARF4_2		TCAAATGACTCCACGTAcggatgtggatctgtagcctgacatgTCGATATTGGATTGGTT
3170	ZmARF4_1		TCAAATGACTCCACGTAtcgagctgggacgtatcgctgacatgTCGATATTGGATTGGTT
3169	ZmARF27_2		TCAAATGACTCCACGTAaccgggttcattacctacggggctcgTCGATATTGGATTGGTT
3168	ZmARF27_1		TCAAATGACTCCACGTAcacgcgttagtcccacttagacgtagTCGATATTGGATTGGTT
3167	ARF5 H170A Rv new		CACTGAGAAACCTCCAGCTGTGCTTGTGTCAC
3166	ARF5 H170A Fw new		GTGACACAAGCACAGCTGGAGGTTTCTCAGTG
3165	pGP8A_gibson_ZmARF18_R	Romi	gtatcgataagcttgatatcgaattctcatcccaactcgaccg	ARF Vector
3164	pGP8A_gibson_ZmARF20_R	Romi	gtatcgataagcttgatatcgaattcTCACTCAAATTGGTCGTA	ARF Vector
3163	AFB2R_2	Romi	CACCAGTCTCGGTGATTTCAT	genotyping 2 guide AFB2
3162	AFB2F_2	Romi	TCTTGAGCTGCTTTCTCGTTC	genotyping 2 guide AFB2
3161	AFB2R_1	Romi	AATCAACGGAGGAAAGTCaaaa	genotyping 2 guide AFB2
3160	AFB2F_1	Romi	GGCAAAAGGTTTTCATTGGA	genotyping 2 guide AFB2
3159	pGP8A_gibson_ZmARF1_R	Romi	gtatcgataagcttgaAatcgaattcCTAGTCGCCGGTGACCCT	ARF Vector
3158	pGP8A_gibson_ZmARF35_R	Romi	gtatcgataagcttgaAatcgaattcTCATTCAAACTGGTCATA	ARF Vector
3157	WPP_Tomato_BLRP_Linker_F	HG	CACTCTGTGGTCTCAAATGATGAATCATTCAGCGAAAACCAC	Pericycle
3156	WPP_Tomato_BLRP_Linker_R	HG	CACTTCGTGGTCTCAACCTCCAGATCCACCAGTATCCTCATGC	Pericycle
3155	Apoplastic_GFP_linker_F	HG	CACTCTGTGGTCTCAGGTGGCATGAAGACTAATCTTTTTCTC	Pericycle
3154	Apoplastic_GFP_Linker_R	HG	CACTTCGTGGTCTCAAAGCTTTGTATAGTTCATCCATGCCATG	Pericycle
3153	Cleavage_signal_Linker_F	HG	CACTCTGTGGTCTCAAGGTCTTGAGGGAGGATCTAAGTTTGCAAATGAT	Pericycle
3152	Cleavage_signal_linker_R	HG	CACTTCGTGGTCTCACACCGGGCCCAGGGTTGGACTCGACG	Pericycle
3151	At5g01747_F_V2	HG	CACTCTGTGGTCTCAGGAGGCAGGTCCATGCAAGCAACACA	Promoter
3150	At5g01747_F_V3	HG	CACTCTGTGGTCTCAGGAGAATGCCACGTGTCGTTCCCAT	Promoter
3149	Level_0_F	HG	CAGCGGCCGCAATCACGAAGTGCATGGTCATAGCTGTTTCCTGTGTG	Vector
3148	Level_0_R	HG	TTGCGGCCGCTGTCACAGAGTGTGGTGCACTCTCAGTACAATCTGCT	Vector
3147	Level_0_seq_F	HG	AAGCCCGTCAGGGCGCGTCAGC	Seq verification
3146	Level_0_seq_R	HG	ATGCTTCCGGCTCCTATGTTGTG	Seq verification
3145	1740_seq1_f	HG	TGTAGTTGAGTCCAGCGGCTATTG	Seq verification
3144	1740_seq2_F	HG	TAAAGGTTATATCATCACTATAAC	Seq verification
3143	1747_seq1_F	HG	GTGAACGGTTAACGTGTATTGT	Seq verification
3142	1747_seq2_f	HG	GCATTGCCTGTTCTTGTACATG	Seq verification
3141	1747_seq3_f	HG	CATTGAGCTGTCGGATGGTACTC	Seq verification
3140	1750_seq1_f	HG	ACCGCTCCTTATCAAATGGTAT	Seq verification
3139	1750_seq2_f	HG	CTAATGGCAACAATATTAAATA	Seq verification
3138	Arf5_seq1_f	HG	GGAAGATACACTTCCTCCCGT	Seq verification
3137	Arf5_seq2_f	HG	TAAAGCTGCAACGGCATCGCC	Seq verification
3136	Arf7_seq1_f	HG	GTACTGGGAAAAGAGTGTAAG	Seq verification
3135	Arf7_seq2_f	HG	CCAGTTTGCTAGTGAATATGTCG	Seq verification
3134	Arf19_seq1_f	HG	TACTTTGGAAAGAGTCAGAGTTG	Seq verification
3133	Arf19_seq2_f	HG	TCGCATTATACGGACATGTCTC	Seq verification
3132	BrIAA29F	aaa	GGCCAGCCAGACGAGGAGGA	qPCR
3131	BrIAA29R	aaa	CCACCCCACGACTTCGCCAT	qPCR
3130	BrIAA19F	aaa	CCGTGGCATTGGAGTGGCCTT	qPCR
3129	BrIAA19R	aaa	TCCAGCGAGCATCCAATCCCCA	qPCR
3128	Br_SAUR15_R	aaa	GCAGAGCTTGAAACGAAGGGTGGT	qPCR
3127	Br_SAUR15_F	aaa	TCCTGAGCCGCTCTGTAACGTCT	qPCR
3126	ARF5_H170A_Fw	al	GCTGGAGGTTTCTCAGTGCCACGTAG
3125	ARF5_H170A_Rv	al	GCTGTGCTTGTGTCACTTGCAGTAAGTG
3124	Ubi10_seq_1	HG	ACGATTTTCTGGGTTTGATCGTTA	INTACT
3123	NTF_F	HG	CGCAGCTTCACCTTGTAGATGAAC	INTACT
3122	NTF_R	HG	CGATATCTTCGAAGCTCAGAAG	INTACT
3121	BirA_seq_F1	HG	TGCTGCGTTGGAACTCTTCGAA	INTACT
3120	BirA_seq_R1	HG	CTCTCCGATACGATCAAGAAGG	INTACT
3119	BirA_seq_R2	HG	CCCATCCAGGGTTTTATTATTC	INTACT
3118	ARF19_f	HG	CACTCTGTGGTCTCAGGAGGTTAATTCGTTTTGATGAGG	PERICYCLE WORK
3117	ARF19_r	HG	CACTTCGTGGTCTCACATTGGTTTATAGAAAGAACG	PERICYCLE WORK
3116	ARF5_f	HG	CACTCTGTGGTCTCAGGAGATATATCTTAGTGACAAACGCG	PERICYCLE WORK
3115	ARF5_r	HG	CACTTCGTGGTCTCACATTACAGAGAGATTTTTCAATG	PERICYCLE WORK
3114	ARF7_f	HG	CACTCTGTGGTCTCAGGAGTTTAAACGTTAGCTAGGCC	PERICYCLE WORK
3113	ARF7_r	HG	CACTTCGTGGTCTCACATTGATCACTCAACTTTACTTTC	PERICYCLE WORK
3112	AT5G01740_F	HG	CACTCTGTGGTCTCAGGAGGTTATGAGCCCATTCCATGACCCA	PERICYCLE WORK
3111	AT5G01740_R	HG	CACTTCGTGGTCTCACATTTTGTATATTTCTCTCTTCAGACTTAGA	PERICYCLE WORK
3110	AT5G01747_F	HG	CACTCTGTGGTCTCAGGAGGATCTCTTGAAGGGGACTTGTATTTCT	PERICYCLE WORK
3109	AT5G01747_R	HG	CACTTCGTGGTCTCACATTTTGCTCATCACACACCTTCATCATTC	PERICYCLE WORK
3108	AT5G01750_F	HG	CACTCTGTGGTCTCAGGAGTGATCACGCATCTTGATCAGCGTCGCT	PERICYCLE WORK
3107	AT5G01750_R	HG	CACTTCGTGGTCTCACATTTCTTCTCTTTCTCCACCGAAATTGATTCACTCTCTC	PERICYCLE WORK
3106	35S_R	HG	ATAGAGGAAGGGTCTTGCG	PERICYCLE WORK
3105	EGFP-Nter_R	HG	CGTCGCCGTCCAGCTCGACCAG	PERICYCLE WORK
3104	T7_F	HG	TAATACGACTCACTATAGG	PERICYCLE WORK
3103	RIGHT_ARM_F	HG	GTTTACCCGCCAATATATCCTGTCA	PERICYCLE WORK
3102	LEFT_ARM_R	HG	CAAAGTCTGCCGCCTTACAACGGCT	PERICYCLE WORK
3097	HD1_Clon_R	ARL	TTATGTTTTAGGAGGAAACGCC	HD1 cloning primer
3096	HD1_Clon_F	ARL	ATGGATACTGGCGGCAA	HD1 cloning primer
3095	HD1_RT3	ARL	TCATCATTCAGACATGCAACG	HD1 cloning primer
3094	HD1_RT2	ARL	TCATTCAGACATGCAACGAA	HD1 cloning primer
3093	HD1_RT1	ARL	TCCGTGCTCAATCCTCTAAAA	HD1 cloning primer
3092	MED12_SeqF10	ARL	GCCAATCCTCCTTCCTTCTC	Sequencing primer
3091	MED12_SeqF9	ARL	AGTCCCAGTGTTGGCTATGG	Sequencing primer
3090	MED12_SeqF8	ARL	TGCCATCCTCTGGTTATTCC	Sequencing primer
3089	MED12_SeqF7	ARL	CTGTGAAGGGATCACGAGGT	Sequencing primer
3088	MED12_SeqF6	ARL	GCGATCAGGAAATGGTGAGT	Sequencing primer
3087	MED12_SeqF5	ARL	CTTCCACCCCTGTGGATATG	Sequencing primer
3086	MED12_SeqF4	ARL	TTCCACTTCCCTTTCGTCTG	Sequencing primer
3085	MED12_SeqF3	ARL	AGAGATTTCCGTGCTGGTGT	Sequencing primer
3084	MED12_SeqF2	ARL	TTGCTGTCCGTTTCATTCAG	Sequencing primer
3083	MED12_SeqF1	ARL	TCCCACTATTGAGAGCTACTTGG	Sequencing primer
3082	PHYB3_dcapsR	bh	AACAAGAACCGTGACGCTTGAGGAATCTCA	GENOTYPING PHYB-3 MUTATS BRAPA; PRIMER THAT MAKES THE CHANGE IN SEQUENCE
3081	PHYB3_dcapsF	bh	GTTTTACGCTATCTTACACAGG	GENOTYPING PHYB-3 MUTATS BRAPA
3080	pCBC-T2T3 F	RR	GTTTTAGAGCTAGAAATAGC
3079	pCBC-T2T3 R	RR	CAATCACTACTTCGTCTCTAACCA
3078	BrGLK1_R	aaa	GCCTCAGGCGCTTGTCCGTT
3077	BrGLK1_F2	aaa	AAGCCACCCGCTGTTGACGG
3076	BrSIG6_R	aaa	ACACCAACGTGGCCTGCGAG
3075	BrSIG6_F	aaa	ACGCTTGCCGGAGAACGTGTA
3074	Klenow common reverse primer	al	AACCAATCCAATATCGA
3073	gAFB5_2R	Romi	ATATATGGTCTCGATTGGTAGAGGGTAGATCCAACGGGTTTTAGAGCTAGAAATAGC
3072	gAFB5_1F	Romi	ATATTATTGGTCTCGAAACGCGCATGACTAATGCCGCTGCAATCTCTTAGTCGACTCTAC
3071	3' of pIAA19 no overhang Fw	al	AAAATGCAGATTTTCGTCAAGACTTTGACC
3070	5' of pIAA19 no overhang Rv	al	gtcgtgactgggaaaaccctgg
3069	SAUR15_290_replace pIAA19 Rv	al	CGAAAATCTGCATTTTattttcccttatgttttcctgaagcttaaatgtttcttag
3068	SAUR15_290_replace_pIAA19 Fw	al	gggttttcccagtcacgaccagtgatagagacttgtggttcattaggtacacaac
3067	SAUR15 minimal putin A1 Rv	al	GAAAACCAATCCAATATCGAgagcacatggctttgggttgtagatactaaac
3066	SAUR15_minimal_putin_A1_Fw	al	CAAATGACTCCACGTAtgtccctacataatctatagagagatttggcatgtg
3065	second most enriched promoter	al	TCAAATGACTCCACGTATAACATAGGGTTAGGGTAACCGGACATCGATATTGGATTGGTT
3064	most enriched promoter	al	TCAAATGACTCCACGTACGTCGTTCGGGCTGGCCCGCGCGACATCGATATTGGATTGGTT
3063	check for HH7 in libraries Fw	al	gagacaccaaaggtgtctcTCGAT
3062	BIF4-NotI_R	MMTT	GCGGCCGCCTAAGCTGCAGCTCT	pGREEN IAA28p::BIF4
3061	IAA28p-EcoRI_F	MMTT	GAGAGAATTTGTAGTGGAATTCTAAGTATACAT	pGREEN IAA28p::BIF4
3060	gTIR1_1F	Romi	ATATATGGTCTCGATTGCATGGTACGAGATCGAGCGGGTTTTAGAGCTAGAAATAGC	3gRNA TIR1,AFB1,AFB4
3059	gAFB1_2F	Romi	TATTATTGGTCTCAAGATTGGGGGTGGTTATGCTTGGCCGGTTTTAGAGCTAGAAATAGC	3gRNA TIR1,AFB1,AFB4
3058	gAFB4_3R	Romi	TATTGGTCTCGAAACCCGCTACATTCACGAACAAGCCAATCACTACTTCGTCTCTAACCA	3gRNA TIR1,AFB1,AFB4
3057	bri1 genotyping primer		TGTCCAGAAACATCATCGAAC
3056	bri1 genotyping primer		AAGGAGAGATCCCTCAGGAG
3055	BEH4 first strand 5' primer backup
3054	BEH4 First strand 3' primer 2		TTGAGCATTACATGGGAAGAGA
3053	BEH4 First strand 3' primer 1		TCAACCGGGTTTGAAAATGT
3052	BES1 First strand 5' primer backup
3051	BES1 First strand 3' primer 2		CTAAAAGGAATGATAATAGAAACATACATCTTAAAC
3050	BES1 First strand 3' primer 1		TGCGTTGTGAAACAAACTCAC
3049	BEH4 Gibson primer Rv		GTACAAGAAAGCTGGGTGTTACCTGGTGCTTGAGTTTCCAAGAGTG
3048	BEH4 Gibson primer Fw		GCAGGCTTCAAAATGACATCAGGGACGAGAATGCC
3047	BES1 Gibson primer Rv		CAAGAAAGCTGGGTGTCAACTATGAGCTTTACCATTTCCAAGCG
3046	BES1 Gibson primer Fw		GCAGGCTTCAAAATGAAAAGATTCTTCTATAATTCCAGCGAAGAAGAAAG
3045	4A plasmid backbone 3' Fw		CACCCAGCTTTCTTGTACAAAGTGGtg
3044	4A plasmid backbone 5' Rv		TTTGAAGCCTGCTTTTTTGTACAAACTTGtg
3039	MED13_cDNAR2	ARL	TTAAACTCCTGTCTTATCAGGTATCCTGGAGAC	Amplifying MED13/MAB2 cDNA (at1g55325.1 isoform)
3038	MED13_cDNAR3	ARL	TTAAACTCCTGTCTTATCAGGTATCC	Amplifying MED13/MAB2 cDNA (at1g55325.1 isoform)
3037	MED13_RT_4	ARL	AGACTACTCGGGAGGTGCAG	Amplifying MED13/MAB2 cDNA (at1g55325.1 isoform)
3036	MED13_RT_5	ARL	GAGGTGCAGGATGAAGTTCG	Amplifying MED13/MAB2 cDNA (at1g55325.1 isoform)
3035	MED13_RT_6	ARL	CAGGATGAAGTTCGCTGAAAG	Amplifying MED13/MAB2 cDNA (at1g55325.1 isoform)
3034	TPL_Delhelix_9R	ARL	ATTTCTAAGAGTAGGGAAC	TPL-helix-by-helix deletion series
3033	TPL_Delhelix_9F	ARL	TAACACCCAGCTTTCTTG	TPL-helix-by-helix deletion series
3032	TPL_Delhelix_8-9R	ARL	GTCCCCATACTTGGATAAC	TPL-helix-by-helix deletion series
3031	TPL_Delhelix_8-9F	ARL	TAACACCCAGCTTTCTTG	TPL-helix-by-helix deletion series
3030	TPL_Delhelix_7-9R	ARL	ATTAAAAGTTGAAAACACTTTCAAATC	TPL-helix-by-helix deletion series
3029	TPL_Delhelix_7-9F	ARL	TAACACCCAGCTTTCTTG	TPL-helix-by-helix deletion series
3028	TPL_Delhelix_6-9R	ARL	GGGACGATCATGCTTATC	TPL-helix-by-helix deletion series
3027	TPL_Delhelix_6-9F	ARL	TAACACCCAGCTTTCTTG	TPL-helix-by-helix deletion series
3026	TPL_Delhelix_5-9R	ARL	ATTATCATCTACTTTAGTGAAAC	TPL-helix-by-helix deletion series
3025	TPL_Delhelix_5-9F	ARL	TAACACCCAGCTTTCTTG	TPL-helix-by-helix deletion series
3024	TPL_Delhelix_4-9R	ARL	ATTTCCATTGTGAACCTC	TPL-helix-by-helix deletion series
3023	TPL_Delhelix_4-9F	ARL	TAACACCCAGCTTTCTTG	TPL-helix-by-helix deletion series
3022	TPL_Delhelix_3-9R	ARL	CCCAGATTCTTGTTCAAG	TPL-helix-by-helix deletion series
3021	TPL_Delhelix_3-9F	ARL	TAACACCCAGCTTTCTTG	TPL-helix-by-helix deletion series
3020	pHEE401E_DelCas9_R	ARL	TATAACCATGGTATTGGTTTATC	Remove CAS9 from pHEE401E
3019	pHEE401E_DelCas9_F	ARL	GAATTCGTAATCATGTCATAG	Remove CAS9 from pHEE401E
3018	pHEE401E_R1	ARL	ttccagctcagtggatctctg	CRISPR 4 guide sequencing primer
3017	3rd_guide_seq	ARL	CGTGAGTGTGAGTGAGACTTGCATA	CRISPR 4 guide sequencing primer
3016	2nd_guide_seq	ARL	TTAATCCAAACTACTGCAGCCTGAC	CRISPR 4 guide sequencing primer
3007	DT2-BsR3	ARL	ATATTATTGGTCTCatcactacttcgtctctaaccat	CRISPR 4 guide primer
3006	MED13_cDNA_F	ARL	ATGTGGACTAATGTTTTCAGAATTGGTGGTC	Amplifying MED13/MAB2 cDNA (at1g55325.2 isoform)
3005	MED13_cDNA_R	ARL	TTAAGCCATGTGATGCATAGAAGAAAGTGG	Amplifying MED13/MAB2 cDNA (at1g55325.2 isoform)
3004	MED13_cDNA_F2nest	ARL	ATCCCCAAGTGATGTGGACT	Amplifying MED13/MAB2 cDNA (at1g55325.2 isoform)
3003	MED12_cDNA_F	ARL	ATGCAAAGGTATCATGCTGCCAACTG	Amplifying MED12 cDNA
3002	MED12_cDNA_R	ARL	TCAGCTGTCGTCGTCTACTGAACC	Amplifying MED12 cDNA
3001	CYCC1_cDNA_F	ARL	aTGGCTGCCAATTTCTGGAATTCATCTCA	Amplifying CYCC;1.2 cDNA
3000	CYCC1_cDNA_R	ARL	CTACAGCTTCAAAGCCAATTTGCTGAAGG	Amplifying CYCC;1.2 cDNA
2999	pGREEN_BIF4OH_F	MMTT	AGGAAGAGAGCTGCAGCTTAGGCGGCCGCCACC	amplify pGREEN backbone with BIF4 overlaps
2998	ARF19 genotyping Rv	al	CTGGTTGTGCTTGCATCTGT
2997	ARF19 genotyping Fw	al	CTCCGACTCTTTCCTCATCG
2996	ARF7 genotyping Rv	al	AGCACATCACCATTTAGGTGC
2995	ARF7 genotyping Fw	al	CAGCTAGATCGTTCGAAATGG
2994	SHP2 genotyping Rv	al	CAGGTCAAGTCAATAGATTCCCTAC
2993	SHP2 genotyping Fw	al	GAGGATAGAGAACACTACGAATCGTC
2992	SHP1 T_DNA Fw	al	GATGCACTCGAAATCAGCCAATTTTAGAC
2991	SHP1 genotyping Rv	al	GTCTACTGATGAGTTGTCACTAGG
2990	SHP1 genotyping Fw	al	GTGACGGAAGGAGGGTTGACG
2989	SALK_025953 Rv	al	GAAGAAAAGATTACGGTCGGG
2988	SALK_025953 Fw	al	GAAAGCAAGTTGGCACTTTTG
2987	MINIYO genotyping Rv	al	TGACATTGTCTGCAACTTTGC
2986	MINIYO genotyping Fw	al	TGAATGAACATCACATACCCG
2985	MAB2_seqF1	ARL	GTAGCACCTGGGGACTCTGA	Cloning MED13/MAB2
2984	MAB2_seqF2	ARL	AACTTGCCCCATAACCAGTG	Cloning MED13/MAB2
2983	MAB2_seqF3	ARL	GGCATGGATATCAAGGCACT	Cloning MED13/MAB2
2982	MAB2_seqF4	ARL	GATGGAGCAGGCGATATGAT	Cloning MED13/MAB2
2981	MAB2_seqF5	ARL	AAACCTGCTAGTTCGCCAAA	Cloning MED13/MAB2
2980	MAB2_seqF6	ARL	GATGGTGGGAAAGGAGATGA	Cloning MED13/MAB2
2979	MAB2_seqF7	ARL	TGTCCATTTCCTGACCCTTC	Cloning MED13/MAB2
2978	MAB2_seqF8	ARL	GTTCTGGACCTGGCATGAAT	Cloning MED13/MAB2
2977	MAB2_seqF9	ARL	TCCCTGCATTTTGTTCTTCC	Cloning MED13/MAB2
2976	MAB2_seqF10	ARL	TGAGACGTCTTCTTCACTTTGC	Cloning MED13/MAB2
2975	MAB2_SeqR1	ARL	GAATGACGCCCAGGTAGAAA	Cloning MED13/MAB2
2974	MED13_RT_R1	ARL	AGACTACTCGGGAGGTGCAG	Cloning MED13/MAB2
2973	MED13_RT_R2	ARL	GAGGTGCAGGATGAAGTTCG	Cloning MED13/MAB2
2972	MED13_RT_R3	ARL	CAGGATGAAGTTCGCTGAAAG	Cloning MED13/MAB2
2971	CYC1_RT_R1	ARL	TTGCCACAAAGCTAGATGGA	cloning CYC
2970	CYC1_RT_R2	ARL	ATGGGCAATTGTGGAAGTCT	cloning CYC
2969	CYC1_RT_R3	ARL	TAGATGGATGGGCAATTGTG	cloning CYC
2968	MED12_RT_R1	ARL	ACCCGAAGATCCAAGCtttt	cloning MED12
2967	MED12_RT_R2	ARL	CCGAAGATCCAAGCtttttG	cloning MED12
2966	MED12_RT_R3	ARL	TTCTTCATGAGCCCCTCAAT	cloning MED12
2965	Stuffer_14_rev	HG	ttttttcttgaagcggccgcTAGTGATTAGTATGCCTCCTAATGACTTTAACTTAAC	StufferDNA_cloning
2964	Stuffer_14_fwd	HG	cccagtcacgacgcggccgcAAAAAGAACCCTCCGACTCCGTCC	StufferDNA_cloning
2963	Stuffer_13_rev	HG	ttttttcttgaagcggccgcGTGATTCAACACAGCTCATCATATTCCAAACTTGC	StufferDNA_cloning
2962	Stuffer_13_fwd	HG	cccagtcacgacgcggccgcATCCGACGGCTGTGATGCGCTAGC	StufferDNA_cloning
2961	Stuffer_12_rev	HG	ttttttcttgaagcggccgcAACGATTACTTTTTTGCATCACGAC	StufferDNA_cloning
2960	Stuffer_12_fwd	HG	cccagtcacgacgcggccgcAATCGAGTAAAACATATACACCAAAATATTTTG	StufferDNA_cloning
2959	Stuffer_10_rev	HG	ttttttcttgaagcggccgcATGCAACACCAGACCCCTATCTATC	StufferDNA_cloning
2958	Stuffer_10_fwd	HG	cccagtcacgacgcggccgcAACTCTAAGGTTTGGGTTTTGGTTTTTC	StufferDNA_cloning
2957	Stuffer_09_rev	HG	ttttttcttgaagcggccgcTTCAAACGATTCGAACTGGCTGGTG	StufferDNA_cloning
2956	Stuffer_09_fwd	HG	cccagtcacgacgcggccgcACGTACTCTTCTATGACTCACCTC	StufferDNA_cloning
2955	Stuffer_08_rev	HG	ttttttcttgaagcggccgcTACTTGCAATATTTTTCGAGGTCAAG	StufferDNA_cloning
2954	Stuffer_08_fwd	HG	cccagtcacgacgcggccgcGAATCCCTGCGATCTTACATCGAAAAATTC	StufferDNA_cloning
2953	Stuffer_07_rev	HG	ttttttcttgaagcggccgcCCTTCGAACCGCGTCGCTTTCACT	StufferDNA_cloning
2952	Stuffer_07_fwd	HG	cccagtcacgacgcggccgcAGGGTGCGATTGGATAAGAAGCAC	StufferDNA_cloning
2951	Stuffer_06_rev	HG	ttttttcttgaagcggccgcCTACTCCAAATTTTGAACTAAATGTACTTTTTGGGGC	StufferDNA_cloning
2950	Stuffer_06_fwd	HG	cccagtcacgacgcggccgcGGATGCAACACGAGGACTTTCCGG	StufferDNA_cloning
2949	Stuffer_05_rev	HG	ttttttcttgaagcggccgcCTGAGGAAGGAAAATGGAATTCTTC	StufferDNA_cloning
2948	Stuffer_05_fwd	HG	cccagtcacgacgcggccgcAAAAAAGAGGGATGCTACACGAAG	StufferDNA_cloning
2947	Stuffer_03_rev	HG	ttttttcttgaagcggccgcTTTCGGGCCTTTTCGCGATC	StufferDNA_cloning
2946	Stuffer_03_fwd	HG	cccagtcacgacgcggccgcGATGCAACACGAGGACTTTC	StufferDNA_cloning
2945	Stuffer_02_rev	HG	ttttttcttgaagcggccgcCTTGCATTCGCATTGCATGTTTTG	StufferDNA_cloning
2944	Stuffer_02_fwd	HG	cccagtcacgacgcggccgcTGGTCGAGTAAATGGATTGAGTAG	StufferDNA_cloning
2943	Stuffer_01_rev	HG	ttttttcttgaagcggccgcAGGGTGCGATTGGATAAG	StufferDNA_cloning
2942	Stuffer_01_fwd	HG	cccagtcacgacgcggccgcGACTTCCAGCTTCACCCTTC	StufferDNA_cloning
2941	pG3(2x)backbone_rev	HG	gcggccgcGTCGTGACTGGGAAAACCCTGGCGGA	StufferDNA_cloning
2940	pG3(2x)backbone_fwd	HG	gcggccgcTTCAAGAAAAAATGCAGATTTTCGT	StufferDNA_cloning
2939	U6-1p-R	ARL	TATGCAAGTCTCACTCACACTCACG	Sequencing primers for CRISPR construct
2938	U6-29t-F	ARL	CGTGTTTCAGCTCTCATGATCCTTG	Sequencing primers for CRISPR construct
2935	gIAA28_DII_3R	MMTT	ATTATTGGTCTCGAAACTCCCACCACTGGAGCTACCCAATCACTACTTCGTCTCTAACCA	guide RNAs for CRISPR/CAS9 editing of IAA18/26/28 in degron
2934	gIAA26_DII_2F	MMTT	ATATTATTGGTCTCAAGATTGTCTTTCTGAACGAACGAACGTTTTAGAGCTAGAAATAGC	guide RNAs for CRISPR/CAS9 editing of IAA18/26/28 in degron
2933	gIAA18_DII_1F	MMTT	ATATATGGTCTCGATTGGCCTCCGGTTCGATCCTTCGTTTTAGAGCTAGAAATAGC	guide RNAs for CRISPR/CAS9 editing of IAA18/26/28 in degron
2932	gIAA28_3R	MMTT	ATTATTGGTCTCGAAACTGTCACCAATTCACTTCCACAATCACTACTTCGTCTCTAACCA	guide RNAs for CRISPR/CAS9 editing of IAA18/26/28 in first exon
2931	gIAA26_2F	MMTT	ATATTATTGGTCTCAAGATTGTAAGGCTTGGACCACCCGGGTTTTAGAGCTAGAAATAGC	guide RNAs for CRISPR/CAS9 editing of IAA18/26/28 in first exon
2930	gIAA18_1F	MMTT	ATATATGGTCTCGATTGTGGAGGGTTATTCAAGAAAGTTTTAGAGCTAGAAATAGC	guide RNAs for CRISPR/CAS9 editing of IAA18/26/28 in first exon
2929	ahp6-1_geno_R	MMTT	TCCGAGAATTCTCTATCCATCCT	Genotyping/Sequecning of ahp6-1 allele, no DCAPS
2928	ahp6-1_geno_F	MMTT	TCCTAGCCTCTCTTTTCCAC	Genotyping/Sequecning of ahp6-1 allele, no DCAPS
2927	gAFB3_2F	RW	TATTATTGGTCTCAAGATTGAATCATGGCACAAGATCGAGGTTTTAGAGCTAGAAATAGC
2926	gAFB5_3R	RW	TTATTGGTCTCGAAACCCGTTGGATCTACCCTCTACCAATCACTACTTCGTCTCTAACCA
2925	gAFB2_1F	RW	ATATATGGTCTCGATTGCTGCAATTAGCGGCAATAGGTTTTAGAGCTAGAAATAGC
2924	gAFB2_2R	RW	ATATTATTGGTCTCGAAACCCATTTGTGTGGATTCTCTCAATCTCTTAGTCGACTCTAC
2923	DT0-BsR2	RW	ATATTATTGGTCTCAATCTCTTAGTCGACTCTACCAAT
2922	AFB2/3 b1 gene block	MMTT	https://benchling.com/s/seq-cHmer6gkg6kWjUFdHXMs
2921	pJET1.2_R	MMTT	AAGAACATCGATTTTCCATGGCAG
2920	pJET1.2_F	MMTT	CGACTCACTATAGGGAGAGCGGC
2919	plasAFB2/3 b2-R	MMTT	TCGCCCGGGAAGTATGTCATTTTGAAGCCTGCTTTT
2918	plasAFB2/3 b2-F	MMTT	ACTTTGTACAGATACTGTAGCACCCAGCTTTCTTGTACAAAGT
2917	AFB2/3 b2-R	MMTT	TTGTACAAGAAAGCTGGGTGCTACAGTATCTGTACAAAGTTAGGG
2916	AFB2/3 b2-F	MMTT	ACAAAAAAGCAGGCTTCAAAATGACATACTTCCCGGGCGA
2915	plasAFB2/3 b1-R	MMTT	TCTTCTGGGAAATACGTCATTTTGAAGCCTGCTTTT
2914	plasAFB2/3 b1-F	MMTT	TTAAGATTCTGCAAAGCTAGCACCCAGCTTTCTTGTACAAAGT
2913	AFB2/3 b1-R	MMTT	TTGTACAAGAAAGCTGGGTGCTAGCTTTGCAGAATCTTAACG
2912	AFB2/3 b1-F	MMTT	ACAAAAAAGCAGGCTTCAAAATGACGTATTTCCCAGAAGAAGTCG
2911	plasAFB2/3 a-R	MMTT	TCGTCTGGAAAGTACGCCATTTTGAAGCCTGCTTTT
2910	plasAFB2/3 a-F	MMTT	GGTTCGTGAGTATTCTATGACACCCAGCTTTCTTGTACAAAGT
2909	AFB2/3 a-R	MMTT	TTGTACAAGAAAGCTGGGTGTCATAGAATACTCACGAACCCA
2908	AFB2/3 a-F	MMTT	ACAAAAAAGCAGGCTTCAAAATGGCGTACTTTCCAGACGAAGTAG
2907	ScTAF10-qPCR-f	RW	ATATTCCAGGATCAGGTCTTCCGTAGC	qPCR reference gene in yeast
2906	ScTAF10-qPCR-r	RW	GTAGTCTTCTCATTCTGTTGATGTTGTTGTTG	qPCR reference gene in yeast
2905	AFB2-qPCR-f	RW	CAAGTATGAAACAATGCGATCCCTTTG	qPCR in yeast or plants
2904	AFB2-qPCR-r	RW	TTCTTCCATCCGGTTATTATCATTCTCG	qPCR in yeast or plants
2903	TIR1-qPCR-f	RW	TGAGGAAACTAGAGATAAGGGACTGC	qPCR in yeast or plants
2902	TIR1-qPCR-r	RW	CACGGAACAAGAAGACATCCAAAGG	qPCR in yeast or plants
2901	plasZmTIR1-2_R	MMTT	CTCGCTCCGCCACGTCCCATTTTGAAGCCTGCTTTT	maize F-boze gibson into GP5G
2900	plasZmTIR1-1_F	MMTT	CTTGCGTACAAATACTGTAACACCCAGCTTTCTTGTACAAAGT	maize F-boze gibson into GP5G
2899	ZmTIR1-1_R	MMTT	TTGTACAAGAAAGCTGGGTGTTACAGTATTTGTACGCAAG	maize F-boze gibson into GP5G
2898	ZmTIR1-1_F	MMTT	ACAAAAAAGCAGGCTTCAAAATGGGACGTGGCGGAGCGA	maize F-boze gibson into GP5G
2897	plasOsTIR1-R	MMTT	TCCTCAGGGAAATAGGTCATTTTGAAGCCTGCTTTT	maize F-boze gibson into GP5G
2896	plasOsTIR1-F	MMTT	ATTTCGTTAAAATTCTATAGCACCCAGCTTTCTTGTACAAAGT	maize F-boze gibson into GP5G
2895	OsTIR1-R	MMTT	TTGTACAAGAAAGCTGGGTGCTATAGAATTTTAACGAAATTTGGCG	maize F-boze gibson into GP5G
2894	OsTIR1-F	MMTT	ACAAAAAAGCAGGCTTCAAAATGACCTATTTCCCTGAGGAGGTA	maize F-boze gibson into GP5G
2886	SALK_076684 genotyping Fw take 2	al	gaaacttgccccttccttct
2885	IAA28-Brachy_R	MMTT	TCCACCGCGGTGGCGGCCGCTCAGCTTTCCGTTGCTCCCCTCTTCC
2884	pGREEN-Brachy_F	MMTT	cacaacacaaacttagaaaaATGGCTTGGAATGGGTCGAGGGAGGA
2883	soc mutant LB	al	TTGGGTGATGGTTCACGTAGTGGG
2882	svp genotyping Rv	al	CGTTAGTAATAGACTCCGACGACTG
2881	svp genotypign Fw	al	GAAGGAAGTCCTAGAGAGGCATAAC
2880	soc genotyping Rv	al	ATATCACAAACCGTTTAGAAGCTTCGAGTTGTTCA
2879	soc genotyping Fw	al	TGTGCTCTTTCGTAGCCAAT
2878	agl24 genotyping Rv	al	AAGTGTCGGAGTCATCCTCAAG
2877	agl24 genotyping Fw	al	CAAATTGATGGATCCACCTTC
2876	agl18 genotyping Rv	al	TGCATCTCCCAAATTCTGATAC
2875	agl18 genotyping Fw	al	CCACAGAGCCCAGGTTGATT
2874	agl15 genotyping Rv	al	AATATCCACCTCTGCACAATCCTCCT
2873	agl15 genotyping Fw	al	TTATCTAGATGGGTCGTGGAAAAATCGAG
2872	SALK_076684 genotyping Rv	al	GGATTCAGACAAGGATCGAATC
2871	SALK_076684 genotyping Fw	al	TTTACTTCCGTAACGTGAAGGAG
2870	Salk_006054 genotyping Rv	al	GAAGAAGATATGGTGAGGGGC
2869	Salk_006054 genotyping Fw	al	TCCCAATGGTGTTCTCAAAAC
2860	U6-29p-R	ARL	AGCCCTCTTCTTTCGATCCATCAAC	Sequencing primers for CRISPR construct
2859	U6-29p-F	ARL	TTAATCCAAACTACTGCAGCCTGAC	Sequencing primers for CRISPR construct
2858	U6-26p-F	ARL	TGTCCCAGGATTAGAATGATTAGGC	Sequencing primers for CRISPR construct
2848	OsTIR1_geneblock	MMTT	https://benchling.com/s/seq-tHbzXvi9ZyFofGAyjDwD	geneblock; control for maize F-box
2847	Double ER7_new (TT4) Rv try 2		acccactgttgtcggcctttggccgacaTAC
2846	Double ER7_new (TT4) Fw try 2		acagtgggttgtcggccaaaggccgacaTC
2845	MLCE_Downstream_Flanking_longer-Index_TSBCO6-FlowcellBindingReverse-r		CAAGCAGAAGACGGCATACGAGATATTGGCCACACGATACAACCAATGAAAACCAATCCAATATCGA
2844	MLCE_Downstream_Flanking_longer-Index_TSBCO5-FlowcellBindingReverse-r		CAAGCAGAAGACGGCATACGAGATCACTGTCACACGATACAACCAATGAAAACCAATCCAATATCGA
2843	MLCE_Downstream_Flanking_longer-Index_TSBCO4-FlowcellBindingReverse-r		CAAGCAGAAGACGGCATACGAGATTGGTCACACACGATACAACCAATGAAAACCAATCCAATATCGA
2842	MLCE_Downstream_Flanking_longer-Index_TSBCO3-FlowcellBindingReverse-r		CAAGCAGAAGACGGCATACGAGATGCCTAACACACGATACAACCAATGAAAACCAATCCAATATCGA
2841	MLCE_Downstream_Flanking_longer-Index_TSBCO2-FlowcellBindingReverse-r		CAAGCAGAAGACGGCATACGAGATACATCGCACACGATACAACCAATGAAAACCAATCCAATATCGA
2840	MLCE_Downstream_Flanking_longer-Index_TSBCO1-FlowcellBindingReverse-r		CAAGCAGAAGACGGCATACGAGATCGTGATCACACGATACAACCAATGAAAACCAATCCAATATCGA
2839	FlowCellForward-MLCE_Upstream_Flanking_longer-f		AATGATACGGCGACCACCGAGATCTACACCACAAACTGAATAACAAGAAGAAGAAGACTTTAGATATCAAATGACTCCACGTA
2838	MLCE_library_Downstream_Flanking-r		CACACGATACAACCAATGAAAACCAATCCAATATCGA
2837	MLCE_library_Upstream_Flanking-f		CACAAACTGAATAACAAGAAGAAGAAGACTTTAGATATCAAATGACTCCACGTA
2836	Double ER7_new (TT4) Rv		tgtcggcctttggccgacaacccactgttgtcggcctttggccgac
2835	Double ER7_new (TT4) Fw		acagtgggttgtcggccaaaggccgacaTCGATATTGGATTGGTTTTCATTGGTTGTATC
2834	potential ARF5 specific response reporter Rv		TGTCACCGAGTCGGGTAACAATGTTGTACGTGGAGTCATTTGATATCTAAAGTCTTCTTC
2833	potential ARF5 specific response reporter Fw		CAACATTGTTACCCGACTCGGTGACATCGATATTGGATTGGTTTTCATTGGTTGTATC
2832	TIR1/AFB1-1_F	MMTT	AAAAAGCAGGCTTCAAAATGGGACGTGGCGGAGCGAGA	maize F-box cloning into pDONR
2831	TIR1/AFB1-1_R	MMTT	AGAAAGCTGGGTGTTACAGTATTTGTACGCAAGCAGG	maize F-box cloning into pDONR
2830	AFB2/3- b2_F	MMTT	AAAAAGCAGGCTTCAAAATGACATACTTCCCGGGCGAGGT	maize F-box cloning into pDONR
2829	AFB2/3-b2_R	MMTT	AGAAAGCTGGGTGCTACAGTATCTGTACAAAGTTAGGGGCATCGTC	maize F-box cloning into pDONR
2828	AFB2/3-a_F	MMTT	AAAAAGCAGGCTTCAAAATGGCGTACTTTCCAGACGAAGTAGTTGGGT	maize F-box cloning into pDONR
2827	AFB2/3-a_R	MMTT	AGAAAGCTGGGTGTCATAGAATACTCACGAACCCAGGGGTATCGC	maize F-box cloning into pDONR
2826	OsTIR1_F	MMTT	AAAAAGCAGGCTTCAAAATGACCTATTTCCCTGAGGAGGTA	rice F-box cloning into pDONR
2825	OsTIR1_R	MMTT	AGAAAGCTGGGTGCTATAGAATTTTAACGAAATTTGGCGCATC	rice F-box cloning into pDONR
2824	Brara.I04061r4		CCGGACGACCCACCAGACGA	PIF5 qPCR
2823	Brara.I04061f5		TGGCCACCGGTTGTAAGCGT	PIF5 qPCR
2822	Brara.I04061f4		GCTGCACAGAACCATCCCGGT	PIF5 qPCR f5 goes with r4
2821	Brara.I04061r3		GGTTCTGTGCAGCAGGACGGT	PIF5 qPCR F4 can go with R1,R2
2820	Brara.I04061f3		AAGTGGAATGGCGGCAGCGG	PIF5 qPCR
2819	pGREEN-pIAA28_R	MMTT	atattttctttcaGGTACCCAATTCGCCCTATAGTG
2818	GRMZM2G135978_T01 (TIR1/AFB1-like)	MMTT	https://benchling.com/s/seq-xPlA4HkbEKpLq6ShFzyZ	gBlock
TIR1	GRMZM2G137451 (AFB2/3-like b2)	MMTT	https://benchling.com/s/seq-Nq9zYGpOT1t8yX3PI88R	gBlock
2816	GRMZM2G155849_T01 (AFB2/3-like a)	MMTT	https://benchling.com/s/seq-1UaFbC5gcBu5NTg65Cja	gBlock
2815	pGREEN-BIF4 R	MMTT	AGGAAGAGAGCTGCAGCTTAGGCGGCCGCCACCGCGGTGG
2814	pIAA28-BIF4_F	MMTT	caacacaaacttagaaaaATGGCTTGGAATGGCCGCTT
2813	BIF4-pGREEN F	MMTT	CCACCGCGGTGGCGGCCGCCTAAGCTGCAGCTCTCTTCCT
2812	mGFP4_qPCR_F	MMTT	CACTACTGGAAAACTACCTGTTCCAT
2811	mGFP4_qPCR_R	MMTT	CAGATCATATGAAGCGGCACGACT
2810	pGRN ER7 new into pGRN A1 new Rv		CAATCCAATACCGACACGTGGAGTCATTTG
2809	pGRN ER7 new into pGRN A1 new Fw		CAAATGACTCCACGTGTCGGTATTGGATTG
2808	A1 turn back into TGTCGA Rv		CCAATATCGACACGTGGAGTCATTTGATATC
2807	A1 turn back into TGTCGA Fw		GACTCCACGTGTCGATATTGGATTGG
2806	pGRN_H with NLS-Venus-LUC swap in any pIAA19 promoter sequence Rv		CTGGGAAAACCCTGGCGTACCCAATTCGCCCTATAGTGAGTCGTATTAC
2805	pGRN_H with NLS-Venus-LUC swap in any pIAA19 promoter sequence Fw		GAGGAAAAAAAGAAGTTCAAGAAATGCCAAAGAAGAAGAGGAAAGTCGG
2804	Brara.I04061f1		CAGCAGCAGCAGCGACTCCA	PIF5
2803	Brara.I04061f2		AAGTGGAATGGCGGCAGCGG	PIF5
2802	Brara.I04061R1		GGTTGCCGGCATCGGTGGAA	PIF5
2801	Brara.I04061R2		TGCCGGCATCGGTGGAAACC	PIF5
2800	Brara.I05264f1		TGCGGAATGGCGGCTGTGAG	PHYA
2799	Brara.I05264f2		CGCCTGCGCAAGCAAAGACC	PHYA
2798	Brara.I05264r1		CGGGTGCATTCTCCTCGCGT	PHYA
2797	Brara.I05264r2		ACCCGGACTCGTCGGTTCCA	PHYA
2796	Brara.E02473f1		GGCGTGCCCAGGTGAAGGTC	PHYB
2795	Brara.E02473f2		GCGCTCAGAGGGGACGAGGA	PHYB
2794	Brara.E02473r1		CCGCTGCCACTAGCGGTTGA	PHYB
2793	Brara.E02473r2		GCGGTGTTCCACTCCAGGCA	PHYB
2792	Brara.F00691f1		GCCCGTGAAATGCCCCGTCA	PP2A-housekeeping gene
2791	Brara.F00691f2		CAGCCCGTGAAATGCCCCGT	PP2A-housekeeping gene
2790	Brara.F00691f3		TCGGTGGTAACGCCCCCGAT	PP2A-housekeeping gene
2789	Brara.F00691r1		CGACTCTCGTGGTTCCCTCGC	PP2A-housekeeping gene
2788	Brara.C00985f1		CGGCGTTCCCAAGACCGCAT	DNAJ-housekeeping gene
2787	Brara.C00985f2		CCTCGGCGTTCCCAAGACCG	DNAJ-housekeeping gene
2786	Brara.C00985R1		TCACCACGCCTCTGCCTCCT	DNAJ-housekeeping gene
2785	BEH4_qPCR_Rv		GAGTTTCCAAGAGTGAGTTCAAGATC
2784	BEH4_qPCR_Fw		GGAGAGAGGATACACGAGGAG
2783	BIF4_SDM_single_mutation_Rv		GGAGCAGCTGCCGCCGGC
2782	BIF4_SDM_single_mutation_Fw		GGTCGCGGGATGGCCGCC
2781	BIF4_AAA_single_mutant Rv		CATCCCGCGACCGGAGCAGCTGCCG
2780	BIF4_AAA_single_mutant Fw		CGGTCGCGGGATGGCCGCCAGTG
2779	BIF4_split_gibson_Rv		CCATCCCGCGGCCGCAGCAGCTGCCGCC
2778	BIF4_split_gibson_Fw		CTGCTGCGGCCGCGGGATGGCCGCCAGTGC
2777	BIF4_SDM_R		CCGCAGCAGCTGCCGCCGGCCTGAGGAGTTGAA
2776	BIF4_SDM_F		CCGCGGGATGGCCGCCAGTG
2775	Gib_SpeI-BIF4-AflII_R		TTGTACAAGAAAGCTGGGTGcttaagagcctgatttgggt
2774	Gib_SpeI-BIF4-AflII_F		ACAAAAAAGCAGGCTTCAAAactagttggcgttggagaag
2773	pDONR_SpeI-BIF4-AflII_R		tctccaacgccaactagtTTTGAAGCCTGCTTT	Primers for gibson assembly of pDONR Spe1-pBIF4::FLAG-Venus-BIF4-AflII
2772	pDONR_SpeI-BIF4-AflII_F		CAAATCAGGCTCTTAAGCACCCAGCTTTCTTGTA
2771	ahp6-1_dCAPS_R		TCCGAGAATTCTCTATCCATCCTGTT	genotyping ahp6-1 mutants
2770	ahp6-1_dCAPS_F		GAGCAGTTCTTGCAGCTTGAT	genotyping ahp6-1 mutants
2769	pif4a_sequencing_r		GCTGTACCCCAGGGAACATAAT
2768	pif4a_sequencing_f		CACCAAGGTTGGAGTTTTGAGG
2767	Hyg_R		gtgcttgacattggggagtt
2766	Hyg_F		gatgttggcgacctcgtatt	for genotyping pGREEN0179 transformed plants
2765	SmaI-BIF4_F1P		GGGGCATCCTCCTTCTCG	phosphorylated for blunt-end ligation
2764	SmaI-BIF4_F1		GGGGCATCCTCCTTCTCG
2763	BIF4-AflII_R1		CTTAAGAGCCTGATTTGGGTTGGAG
2762	Bra031672 (phyA) R		CTTGAACCATCGTATCGCAAAGCC
2761	Bra031672 (phyA) F		ATGTCAGGCTCTAGGCCAAGT
2760	4A-ARF2 fix Rv		CCGAACTCGCCATTTTGAAGCCTGCTTTTTTG
2759	4A-ARF2 fix Fw		GCTTCAAAATGGCGAGTTCGGAGGTTTCAATG
2758	4A-ARF6 fix Rv		GAACTCTTTTCTCTCCTGTAACTTCATGAGGTTGAGGATTAAACCCAGC
BIFC_ARFs	4A-ARF6 fix Fw		GTTACAGGAGAGAAAAGAGTTCTTAATTCTGAGCTCTGG
2756	4A-ARF1 fix Rv		GCTGCCATTTTGAAGCCTGCTTTTTTGTACAAAC
2755	4A-ARF1 fix Fw		GGCTTCAAAATGGCAGCTTCCAATCATTCATC
2754	Double mutation in KO Rv		CCAATATCGATAACGGCCTTTGGCCGTTATACGTGGAGTCATTTGATATCTAAAG
2753	Double mutation in KO Fw		CCACGTATAACGGCCAAAGGCCGTTATCGATATTGGATTGGTTTTC
2752	Change KO from C to A in double KO Rv		CAATATCGATATCGGCCTTTGGCCGATATACGTGGAG
2751	Change KO from C to A in double KO Fw		CGTATATCGGCCAAAGGCCGATATCGATATTGGATTGG
2750	Delete extra bit of mpIAA19 Rv		GGTCAAAGTCTTGACGAAAATCTGCATTTTTTCTTGAACTTCTTTTTTTC
2749	Delete extra bit of mpIAA19 Fw		CAAATTGTGAGAGGAAAAAAAGAAGTTCAAGAAAAAATGCAGATTTTCG
2748	Restore A1 in mpIAA19 Rv		CCAATACCGACACGTGGAGTCATTTGATATCTAAAGTCTTCTTC	pair w/ 1796
2747	Restore A1 in mpIAA19 Fw		CCACGTGTCGGTATTGGATTGGTTTTCATTGG	pair w/ 1795
2746	BIF4_seq_R		CCATGTTGACCTTGACGAACAG	amplifies a portion of BIF4 genomic DNA for sequencing
2745	BIF4_seq_F		TTGAGCTCAGCCTTAGCCT	amplifies a portion of BIF4 genomic DNA for sequencing
2744	snf2_300_3 R
2743	snf2_300_3 F
2742	GSHU R
2741	GSHU F
2740	snf2_500_5 R
2739	snf2_500_5 F			for Golden Gate assembly of SNF2-GSHU (to knockout SNF2 in yeast)
2738	Ubivenus Rv for sequencing		GATGTAAGGTGGACTCCTTCTGAATG
2737	TIR1-TR		CACTGAGAGCGAATAATCCAGGAA	for genotyping tir1-10 with pROK-LB (oNL1340)
2736	TIR1+F		TCTCTCTGGTGTGCAAGT	for genotyping TIR1 with TIR1+R
2735	pTF101.1 Venus_F		GACCACTACCAGCAGAAC	For sequencing BIF4 insert in TF101.1 BIF4p::FLAG-Venus-BIF4
2734	end_ADH1_prom_4g_rv		CCATCATTTCTTGGCAAGTGCACAAACAATACTTAAATAAATACTACTCAGTAATAAC
2733	end_ADH1_prom_4G_fw		CAACTATCTCATATACATCTAGAACTAGTGGATCCCCCATCACAAG
2732	ADH1_prom_Rv		TGTATATGAGATAGTTGATTGTATGCTTGGTATAGC
2731	ADH1_prom_Fw		AAGAAATGATGGTAAATGAAATAGGAAATCAAG
2730	DR7_Fix_Rv		GGAAAACCCTGGCGGGCTATACCTGAGAAAGCAACCTGACCTACAGGAAAG
2729	DR7_fix_Fw		CTCAGGTATAGCCCGCCAGGGTTTTCCCAGTCAC
2728	GSHU_R		TAGGGATAACAGGGTAATCCGCGCGTTGGCCGATTCAT
2727	GSHU_F		TTCGTACGCTGCAGGTCGAC
2726	ER7 black for both ARF5 and ARF1 NEW Rv		CGATGTCAACCTTTGGTTGACATACGTGGAGTC
[truncated: 2,735 more rows]

## Sheet: Sheet2
Oligo Name	Sequence	Purpose
MED21_i214G_long_R	GTTGTAGCGGGTGGTTCAGGATAATTAGGTGAAAGCTGGtCTGGTGGTGCATCCCTTTGC	MED21 CRISPR dCAPS primer
5'6-FAM-MED21_PstIdCAPS_R	TAATTAGGTGAAAGCTGGACTGGTGGTGCATCCCTcTGC	MED21 CRISPR dCAPS primer
MED21_i215G_long_F	CAAGTGAATACGATTGCTGCT	Med21_i214G_dCAPS
MED10BF	TGTGACCGTTGCTGATGATT	MED10B Sequencing
MED10BR	TCCATGGGGATTTGAATGTT	MED10B Sequencing
gMED21_R4	GTAGCGGGTGGTTCAGGATA	MED21 CRISPR sequencing
gMED21_F4	ACCACCAATTTTGTGCCATT	MED21 CRISPR sequencing
2ndEAR2A_R2	gctttagcATCAACTGTTTCGGAGAAG	UAS TPL-IAA14 cloning
2458DelH9_F	CCAGCTTTCTTGTACAAAG	TPL Mutagenesis primer
2458DelH9_R	ATTTCTAAGAGTAGGGAAC	TPL Mutagenesis primer
2458DelH8-9_R	GTCCCCATACTTGGATAAC	TPL Mutagenesis primer
2458DelH7L-9_R	CAATGTCAAGAGCTGTGTTATTTC	TPL Mutagenesis primer
2458DelH6-9_R	GGGACGATCATGCTTATC	TPL Mutagenesis primer
2ndEAR2A_F	taatgctCAATCTAACAAACAAGGACATG	UAS TPL-IAA14 cloning
2ndEAR2A_R	gctttagcATCAACGGTCTCGGAGAAG	UAS TPL-IAA14 cloning
MED21_BiFC_del5_F	CAGTTGCAAGAACAAGTG	BiFC mutagenesis
MED21_BiFC_Del5_R	TTTGAAGCCTGCTTTTTTG	BiFC mutagenesis
TPL_BiFC_H8muta_F	cgctgctCTGATTGAGGCGAATCCTTTATTC	BiFC mutagenesis
TPL_BiFC_H8muta_R	agagcagCCAACATGATCGCTCTTG	BiFC mutagenesis
At_cMED21_F	TGCTGCACTTCCTTTGTCAG	MED21 CRISPR sequencing
At_cMED21_R	GTCAGCAGCTTGTCCAAACA	MED21 CRISPR sequencing
At_gMED21_F1	GGAAAGGCCACCTTAAAAGC	MED21 CRISPR sequencing
At_gMED21_F2	TTCGCCATTTTGATCCTCTC	MED21 CRISPR sequencing
At_gMED21_F3	CCAATTCGCAGCGATTATCT	MED21 CRISPR sequencing
At_gMED21_R1	GACCTGGAGTTCAGCGATTC	MED21 CRISPR sequencing
At_gMED21_R2	TCGGTGTGACTTGTTTGACC	MED21 CRISPR sequencing
At_gMED21_R3	aCAGGACAAAGCGGTTAGACA	MED21 CRISPR sequencing
p1521_delTGA_F	CACCCAGCTTTCTTGTAC	BiFC mutagenesis
p1521_delTGA_R	TTCAGGTTTCTTCATGTTC	BiFC mutagenesis
p1984_N188_F	TAGAGTCCGCAAAAATCAC	BiFC mutagenesis
p1984_N188_R	ATTTTTACAAAGCTGGTGTTG	BiFC mutagenesis
p1982_N188_F	TGATATCTAGAGTCCGCAAAAATC	BiFC mutagenesis
p1982_N188_R	ATTTTTACAAAGCTGGTGTTG	BiFC mutagenesis
crAtMed21_F1	ATATATGGTCTCGATTGTTCAAGGTCTTTTAAGGTTTGTTTTAGAGCTAGAAATAGC	MED21 CRISPR
crAtMed21_F2	ATATATGGTCTCGATTGTCTTTTAAGGTTTTGGAAGAGTTTTAGAGCTAGAAATAGC	MED21 CRISPR
crAtMed21_R1	ATTATTGGTCTCGAAACAAAGCATTGAAAGTGATAGCAATCTCTTAGTCGACTCTAC	MED21 CRISPR
crAtMed21_R2	ATTATTGGTCTCGAAACAAAAGCATTGAAAGTGATAGAATCTCTTAGTCGACTCTAC	MED21 CRISPR
crAtMed21_R3	ATTATTGGTCTCGAAACTTGCAGTGTCCCAAAAGCATAATCTCTTAGTCGACTCTAC	MED21 CRISPR
crAtMed21_R4	ATTATTGGTCTCGAAACTTTGCAGTGTCCCAAAAGCAAATCTCTTAGTCGACTCTAC	MED21 CRISPR
crAtMed21_R5	ATTATTGGTCTCGAAACCCAGTCCAGCTTTCACCTAAAATCTCTTAGTCGACTCTAC	MED21 CRISPR
H3-8-145-149-A_R	agagcagcCAACATGATCGCTCTTGCAG	TPL Mutagenesis primer
H3-8-145-149-A_F	cgctgctCTGATTGAGGCGGGGAGA	TPL Mutagenesis primer
H3-8-145-149-A_F	cgctgctCTGATTGAGGCGGGGAGA	TPL Mutagenesis primer
H3-8-145-149-A_R	agagcagcCAACATGATCGCTCTTGCAG	TPL Mutagenesis primer
ScMED21_NswapAt_F	atctcaCAATTGCAGATATGTTTAGAC	N-terminal Sc to At swap of MED21
ScMED21_NswapAt_R	tatatcCATTGTTAAAGAGCATATAATG	N-terminal Sc to At swap of MED21
ScMed21_1xMYC_F	agcgaagaagatctgTAAGGCGCGCCACTTCTAAATAAG	ScMED21 Tag optimization
ScMed21_1xMYC_R	aatcagtttctgttcAGCACCACCACCACCAGA	ScMED21 Tag optimization
ScMed21_2xMYC_F	gaacagaaactgattagcgaagaagatctgTAAGGCGCGCCACTTCTAAATAAG	ScMED21 Tag optimization
ScMed21_2xMYC_R	cagatcttcttcgctaatcagtttctgttcAGCACCACCACCACCAGA	ScMED21 Tag optimization
2611-Monv2_F	cttacagtatctcgatgaatctAAGTTTAAAGAGACTGTTCAC	TPL Mutagenesis primer
2611-Monv2_R	atcaagaaaacagactctctagcAAGAGAAGACGCATAATC	TPL Mutagenesis primer
2611-L8S,F15Y_F	atcttacagtatCTCGATGAAGAGAAGTTTAAAG	TPL Mutagenesis primer
2611-L8S,F15Y_R	caagaaaacagaCTCTCTACTAAGAGAAGAC	TPL Mutagenesis primer
N188-145-149-A_R	agagcagcCAACATGATCGCTCTTGC	TPL Mutagenesis primer
N188-145-149-A_F	cgctgctCTGATTGAGGCGAATCCTTTATTC	TPL Mutagenesis primer
N188-V145AE146A_R	GCTCTTGCAGACTTGGTG	TPL Mutagenesis primer
N188-V145AE146A_F	GATCATGTTGgctgctCTCAAAAAGCTGATTGAGG	TPL Mutagenesis primer
N188-K148AK149A_R	AACATGATCGCTCTTGCAG	TPL Mutagenesis primer
N188-K148AK149A_F	GGTGGAACTCgctgctCTGATTGAGGCG	TPL Mutagenesis primer
med21-bsaI-R	TTCGTGGTCTCAAAGCTTATTCAGGTTTCTTCATGTTCAGG	AtMED21-FLAG
med21-bsaI-flag-R	TTCGTGGTCTCAAAGCTTATTTATCATCATCATCTTTATAATCTTCAGGTTTCTTCATGT	AtMED21-FLAG
med21-bsaI-F	CACTCTGTGGTCTCAAATGGATATAATCTCACAGTTGCAAGAAC	AtMED21-FLAG
ScMED21-2xFLAG_R	TTTATCATCATCATCTTTATAATCAGCACCACCACCACCAGA	yeast MED21-FLAG
ScMED21-2xFLAG_F	GATTATAAAGATGATGATGATAAATAAGGCGCGCCACTTCTAAATAAG	yeast MED21-FLAG
ScMED21-1xFLAG_R	ATCTTTATAATCAGCACCACCACCACCAGA	yeast MED21-FLAG
ScMED21-1xFLAG_F	GATGATGATAAATAAGGCGCGCCACTTCTAAATAAG	yeast MED21-FLAG
delIAA14_2502_F	TAAGCTTGAGCTTTCGTTC	UAS TPL-IAA14 cloning
delIAA14_2502_R	ATTTTTACAAAGCTGGTGTTG	UAS TPL-IAA14 cloning
delTPL_2502_F	ATGAACCTTAAGGAGACG	UAS TPL-IAA14 cloning
delTPL_2502_R	AGAAGACGCATAATCCGG	UAS TPL-IAA14 cloning
AtMED21_Del3_F	ATCTCACAGTTGCAAGAAC	AtMED21 cytoSUS Mutagenesis
AtMED21_Del5_F	CAGTTGCAAGAACAAGTG	AtMED21 cytoSUS Mutagenesis
pURA3_geno_F	ACACCAGAGTCAAACGACGT	SPARC cloning
pURA3_geno_R	GTCATTAGTGGCGAACCCGA	SPARC cloning
pURAF	GATTCGGTAATCTCCGAGCAGAAGGAAG	SPARC cloning
ttURAR	CGGCCCAAGCCTTGTCCCA	SPARC cloning
Med21_pnx32_Del7F	CAAGAACAAGTGAATACG	for deleting MED21 N-term fragments (has ATG)
MED21_pnx32_delR	CATAGCTTTTTTGTACAAAC	for deleting MED21 N-term fragments (has ATG)
GALZ4_MED21Dels_R	CATTTTGTAGATCCACTAGTTC	for deleting MED21 N-term fragments (has ATG)
TPL_S138A_F	GGACACCAAGgctGCAAGAGCGA	TPL Mutagenesis primer
TPL_S138A_R	CCATACTTGGATAACTGTTCATTCTCCC	TPL Mutagenesis primer
TPL_R140A_F	CAAGTCTGCAgctGCGATCATGTTGG	TPL Mutagenesis primer
TPL_R140A_R	GTGTCCCCATACTTGGATAAC	TPL Mutagenesis primer
TPL_S142A_F	TGCAAGAGCGgctATGTTGGTGG	TPL Mutagenesis primer
TPL_S142A_R	GACTTGGTGTCCCCATAC	TPL Mutagenesis primer
TPL_V145A_F	GATCATGTTGgctGAACTCAAAAAGCTG	TPL Mutagenesis primer
TPL_V145A_R	GCTCTTGCAGACTTGGTG	TPL Mutagenesis primer
TPL_E146A_F	CATGTTGGTGgctCTCAAAAAGCTG	TPL Mutagenesis primer
TPL_E146A_R	ATCGCTCTTGCAGACTTG	TPL Mutagenesis primer
TPL_K148A_F	GGTGGAACTCgctAAGCTGATTGAGG	TPL Mutagenesis primer
TPL_K148A_R	AACATGATCGCTCTTGCAG	TPL Mutagenesis primer
TPL_K149A_F	GGAACTCAAAgctCTGATTGAGGCGG	TPL Mutagenesis primer
TPL_K149A_R	ACCAACATGATCGCTCTTG	TPL Mutagenesis primer
TPL_E152A_F	AAAGCTGATTgctGCGGGGAGAG	TPL Mutagenesis primer
TPL_E152A_R	TTGAGTTCCACCAACATG	TPL Mutagenesis primer
TPL_L8S_F	GTCTTCTCTTgctAGAGAGTCTGTTTTCTTG	TPL Mutagenesis primer
TPL_L8S_R	ATCATTTTGTGATGGATCC	TPL Mutagenesis primer
ScMED21_Del2-7_F	TTGCAGATATGTTTAGACC	ScMED21 N-terminal deletions
ScMED21_Del2-7_R	CATTGTTAAAGAGCATATAATG	ScMED21 N-terminal deletions
ScMED21_Del2-5_F	ACACAATTGCAGATATGTTTAG	ScMED21 N-terminal deletions
ScMED21_Del2-5_R	CATTGTTAAAGAGCATATAATG	ScMED21 N-terminal deletions
ScMED21_Del2-3_F	AGATTAACACAATTGCAGATATG	ScMED21 N-terminal deletions
ScMED21_Del2-3_R	CATTGTTAAAGAGCATATAATG	ScMED21 N-terminal deletions
CYC8_F	CCCGCGTACTGTACTCCATC	Amplify CYC8 from yeast for AA
CYC8_R	TCCACCGTAGAACCCAAAGC	Amplify CYC8 from yeast for AA
2444_delBsa_F	AGGCTTCTCCgaaacaGTTGATCTCA	UAS TPL-IAA14 cloning
2444_delBsa_R	CTCTTGTTCCCAACACCC	UAS TPL-IAA14 cloning
FRB_R1	tgccacatctcatgccagag	ScMED21 Sequencing primer
FRB_R2	atagcatgcaagggctccag	ScMED21 Sequencing primer
ScMED21_geno_F1	CGTGAAGTGCGCTTTTGTAGA	ScMED21 Sequencing primer
ScMED21_geno_F2	TGCTTATATGCGTGAAGTGCG	ScMED21 Sequencing primer
2444_delH2-9_F	GGTGGACCAGGTGGTGGA	TPL Mutagenesis primer
2444_delH2-9_R	TTCATCGAGAAACTGTAAGATCAAGAAAACG	TPL Mutagenesis primer
2444_delH1-2_F	TTTTTCTTCAATATGAAGTATTTTGAGGATG	TPL Mutagenesis primer
2444_delH1-2_R	AGACGCATAATCCGGCAC	TPL Mutagenesis primer
TPLMon_HAmut_F	tatccgtatgatgtgccggattatgcgATGTCTTCTCTTAGTAGAGAG	Add HA to Mon - TPL Mutagenesis primers
TPLMon_HAmut_R	cgcataatccggcacatcatacggataCATTTTGTGATGGATCCAC	Add HA to Mon - TPL Mutagenesis primers
2259_N176H_F	GACTTTGATCcatCAGAGCTTAAATTG	TPL Mutagenesis primers to introduce tpl1 mutation
2259_N176H_R	CTCAGCCTTGAATTTCTAAG	TPL Mutagenesis primers to introduce tpl1 mutation
TPLNmon_2xHA_F	tatccgtatgatgtgccggattatgcgTCTTCTCTTAGTAGAGAGT	TPL monomer HA tagging
2199_HbyHDels_F	CCAGCTTTCTTGTACAAAG	cytosus TPL deletions
2199_delH1_F	GAGAAGTTTAAAGAGACTGTTC	cytosus TPL deletions
2199_delLisH_R	TTTTTTGTACAAACTTGTTCTAG	cytosus TPL deletions
2199_delLisH_F	TTTTTCTTCAATATGAAGTATTTTG	cytosus TPL deletions
ScMed21_F	GGCCAACCGTACGTGCTTAA	Amplify MED21 from yeast for AA
ScMed21_R	TGAATTTGGCTGGGAGTGCA	Amplify MED21 from yeast for AA
ScMed21_F2	GCTGTTTCTGTAGAAGCCTTGT	Amplify MED21 from yeast for AA
ScMed21_R2	CGTGGACAACTGCTGAACCT	Amplify MED21 from yeast for AA
ScTUP1_F1	AATCCGGTACAGGCCACAAG	Amplify TUP1 from yeast for AA
ScTUP1_F2	CGTGCTGTGAGAGTTTGGGA	Amplify TUP1 from yeast for AA
ScTUP1_R1	AAGGATGGCCAACTCATCGG	Amplify TUP1 from yeast for AA
ScTUP1_R2	GACGTGGACGAATCACCAGA	Amplify TUP1 from yeast for AA
VA1_F	CCCCTTAGGTTGCAAATGCTCCG	SPARC cloning
VA3_R	GCCGCGAGTCACTACTAAACTGTCTCTCC	SPARC cloning
VA3_F	GGAGGTACTGGCCTAGCGTCGTGG	SPARC cloning
VA4_R	TGGGGACACCATCCCGCC	SPARC cloning
VA4_F	TTGGCGTTAATTGTAGCTTATTTCCCGC	SPARC cloning
VA5_R	TCTATCAGCCCGACGACATGCATC	SPARC cloning
VA5_F	GACTAAGACTCTGGTCACGGTTCAGAAGTGG	SPARC cloning
VA6_R	AGCCGCAATCGTATCTGACTTCTCCC	SPARC cloning
VA6_F	TGCACGGCGCTAGGTGTGATATC	SPARC cloning
VA2_R	CTTCGCTTACATACCCATGACGGGTC	SPARC cloning
VA1_R	ACGATCGCCGGCAGAGAAGG	SPARC cloning
VA2_F	TGACGCTTGGATGCGTGACCC	SPARC cloning
IAA14_EARtoA_F	tggcgctCCCGGAGGCACTGAAACC	UAS TPL-IAA14 cloning
IAA14_EARtoA_R	gcacaagcCTCCGTCTCCTTAAGGTTCATTTTG	UAS TPL-IAA14 cloning
IAA14_to-slr_F	GGGTTGGCCAtctGTGAGGAACT	UAS TPL-IAA14 cloning
IAA14_to-slr_R	ACCACTTGTGCTTTAGCAG	UAS TPL-IAA14 cloning
IAA14_del1-86_F	CGGAAAAATGTTATGGCTAATC	UAS TPL-IAA14 cloning
IAA14_del1-86_R	TTTGAAGCCTGCTTTTTTG	UAS TPL-IAA14 cloning
IAA14_GSlinker_F	agtggctcaggatctACCGTCGCCTTTGTGAAG	UAS TPL-IAA14 cloning
IAA14_GSlinker_R	acctgatccagaaccTTTGAAGCCTGCTTTTTTGTAC	UAS TPL-IAA14 cloning
TPLDelH1_pNX32_F	GCTTTCTTGTACAAAGTG	mutagenisis primers - making TPLH1-pNX32
TPLDelH1_pNX32_R	TTCATCGAGAAACTGTAAG	mutagenisis primers - making TPLH1-pNX32
TPLBsaI_aatg_HA_F	cactctgtggtctcaaatgTATCCGTATGATGTGCCGGATTATGC	UAS TPL-IAA14 cloning
TPLBsaI_gctt__R	ttcgtggtctcaaagctTATGATCTGTTCTTGAACTTCTCCATTGCTC	UAS TPL-IAA14 cloning
AmpRProm_F	aaacaaataggggttccgcg	Sequencing SPARC
LEU2tt_R	tgcgacacgaaattacaaaatgga	Sequencing SPARC
AtHIS3_F	ATGGCTCGTACCAAGCAGACGG	Cloning cytoSUS target
AtHIS3_R	AGCTCGTTCTCCTCTGATTCTTCTCGC	Cloning cytoSUS target
MED21N31_F	GCTTTCTTGTACAAAGTGGTTG	MED21 Mutagenesis - MED21N31
MED21N31_R	TGGTGGTGCATCCCTTTG	MED21 Mutagenesis - MED21N31
TPLCseq_F1	GGAGCAGATGCACAGCTTTG	TPL Sequencing
TPLCseq_F2	ACGGGGGAGTGCACATATTC	TPL Sequencing
DelIAA14N_F	GGTGGAGGAACCGTCGCC	TPL-IAA14 newplant vector-test in yeast
DelIAA14N_R	TTTGAAGCCTGCTTTTTTGTACAAACTTG	TPL-IAA14 newplant vector-test in yeast
ttADH1_tttt_BsaIR	atatatGGTCTCgAAAAgaggtgtggtcaataagagcg	SPARC cloning
ttADH1_tgag_BsaIF	atatatGGTCTCgTGAGgcgaatttcttatgatttatgatttttatt	SPARC cloning
ARF19_tgag_BsaIR	atatatGGTCTCgCTCACCACTTTGTACAAGAAAGCTGGGTG	SPARC cloning
pADH1_cagt_BsaIF	atatatGGTCTCgCAGTAAGAAATGATGGTAAATGAAATAGGAAAT	SPARC cloning
2257_Delhelix_9R	ATTTCTAAGAGTAGGGAACTGCAATTTATC	H-by-H deletions of TPL-IAA14
2257_Delhelix_8-9R	GTCCCCATACTTGGATAACTGTTC	H-by-H deletions of TPL-IAA14
2257_Delhelix_7-9R	ATTAAAAGTTGAAAACACTTTCAAATCCTTCACTAG	H-by-H deletions of TPL-IAA14
2257_Delhelix_6-9R	GGGACGATCATGCTTATCCAAAG	H-by-H deletions of TPL-IAA14
2257_Delhelix_5-9R	CAGAGAGATACTTCTCAACCTCATCC	H-by-H deletions of TPL-IAA14
2257_Delhelix_4-9R	ATTTCCATTGTGAACCTCATCCTCAAAATAC	H-by-H deletions of TPL-IAA14
2257_Delhelix_3-9R	CCCAGATTCTTGTTCAAGCTTGTG	H-by-H deletions of TPL-IAA14
AFB2_tgag_BsaIR	atatatGGTCTCgCTCAtcagagaatccacacaaatggcggcgc	SPARC cloning
AFB2_aatg_BsaIF	atatatGGTCTCgAATGatgaattatttcccagatgaagtaatagagcatg	SPARC cloning
IAA14_tgag_BsaIR	atatatGGTCTCgCTCAtTATGATCTGTTCTTGAACTTCTCCATTG	SPARC cloning
pGPD_cagt_BsaIF	atatatGGTCTCgCAGTagtttatcattatcaatactcgccatttca	SPARC cloning
pP32X_cagt_BsaIF	atatatGGTCTCgCAGTAAACAGCACCAAACTTATATCTCTCATGTG	SPARC cloning
LEU2_BsaI_R	atatatGGTCTCgAAAAtaactttttgtgtggtgccctc	LEU2 Cassette cloning
LEU2_BsaI_F	atatatGGTCTCgCAGTaactgtgggaatactcaggtatcgtaag	LEU2 Cassette cloning
TPLMon1_ExpF	aaaacctctacttccaatcGATGTCTTCTCTTAGTAGAGAGtctGTTTTC	TPL Ecoli Expression
TPLMon1_ExpF2	aaaacctctacttccaatcGATGTCTTCTCTTgcTAGAGAGtctGT	TPL Ecoli Expression
ARS/CEN_BsmbI_R	tataatcgtctcgactcgttaggcgcgccagagttaattaagacg	SPARC cloning - Amplify ARS/CEN
ARS/CEN_BsmbI_F	attatacgtctcccattagacgtcgggtccttttcatcacgt	SPARC cloning - Amplify ARS/CEN
ProteinA_SeqR	cttcatcgtgttgcgcaagg	sequencing pMETOYC clones R
pMET15_F	aggcgccatcctcatgaaaa	sequencing pMETOYC clones F
pXN32_DelCass_R	AGCTTTTTTGTACAAACTTG	mutagenizing pMETOYC
pXN32_DelCass_F	TCTCGTTCAGCTTTCTTG	mutagenizing pMETOYC
pNX32_muta_F	GCTTTCTTGTACAAAGTG	mutagenizing pMETOYC
TPL_delH1_F	GGGGGGAGAGGACCAGGT	TPL Mutagenesis primer
TPL_delH1_R	CTCTTCATCGAGAAACTGTAAGATCAAGAAAACG	TPL Mutagenesis primer
TPL_2180_L8S_F	TAGTAGAGAGtctGTTTTCTTGATCTTACAG	TPL Mutagenesis primer
TPL_2180_L8S_R	AGAGAAGACATCATTTTGTG	TPL Mutagenesis primer
TPL_2178_L8S_F	TGCTAGAGAGtctGTTTTCTTGATCTTACAG	TPL Mutagenesis primer
TPL_2178_L8S_R	AGAGAAGACATCATTTTGTG	TPL Mutagenesis primer
TPLN_1xHA_F	gccggattatgcgTCTTCTCTTAGTAGAGAGC	HA-tagged IAA14-yeast vector cloning
TPLN_1xHA_R	acatcatacggataCATCATTTTGTGATGGATC	HA-tagged IAA14-yeast vector cloning
TPLN_2xHA_F	tatccgtatgatgtgccggattatgcgTCTTCTCTTAGTAGAGAGC	HA-tagged IAA14-yeast vector cloning
TPLN_2xHA_R	cgcataatccggcacatcatacggataCATCATTTTGTGATGGATC	HA-tagged IAA14-yeast vector cloning
TPLdelLisH_F	TTTTTCTTCAATATGAAGTATTTTG	delete LisH domain
TPLdelLisH_R	AGAAGACATCATTTTGTGATG	delete LisH domain
TPLStop_F	TAATTCTGTCATGTAATTAGTTATG	C-terminal (N188) Forward primer (after stop in pGP4G2)
IAA14-ohtplH1-5_F	ggagaggaccaggtggtggacatcaaaCAAGTTTGTACAAAAAAGCAGGCTTCAAAATGA	HA-tagged IAA14-yeast vector cloning
IAA14-ohcyc1t_R	gtgacataactaattacatgacagaaTTAAGCGTAATCTGGCACATCGTATGGGTA	HA-tagged IAA14-yeast vector cloning
pGP4G2_ohIAA14_F	ATACGATGTGCCAGATTACGCTTAAATTAGTTATGTCACGCTTACATTCACGCCC	HA-tagged IAA14-yeast vector cloning
pGP4G2_ohTPLH1-5_R	GAAGCCTGCTTTTTTGTACAAACTTGtttgatgtccaccacctggtcctctc	HA-tagged IAA14-yeast vector cloning
TPL_Delhelix_1_F	GAGAAGTTTAAAGAGACTGTTC	TPL Mutagenesis primer
TPL_Delhelix_1_R	CATCATTTTGTGATGGATC	TPL Mutagenesis primer
TPL_Delhelix_8L_F	GGGAGAGGACCAGGTGGT	TPL Mutagenesis primer
TPL_Delhelix_8L_R	CGCCTCAATCAGCTTTTTGAG	TPL Mutagenesis primer
TPL_iso_helix_8+L_F	ACCAAGTCTGCAAGAGCG	TPL Mutagenesis primer
TPL_iso_helix_8+L_R	CATCATTTTGTGATGGATCCAC	TPL Mutagenesis primer
TPL_iso_helix_8L_F	AATCCTTTATTCCGTGATAAATTG	TPL Mutagenesis primer
TPL_iso_helix_8L_R	CATCATTTTGTGATGGATC	TPL Mutagenesis primer
TPL_iso_H1-2-8+L_F	AACTTCCGGGAGAATGAAC	TPL Mutagenesis primer
TPL_iso_H1-2-8+L_R	CCCAGATTCTTGTTCAAG	TPL Mutagenesis primer
TPL_Delhelix_3-8_F	AATCCTTTATTCCGTGATAAATTG	TPL Mutagenesis primer
TPL_Delhelix_3-8_R	CCCAGATTCTTGTTCAAG	TPL Mutagenesis primer
TPL_helix5_BsaI_R	atatatGGTCTCcagaacTTAGGGACGATCATGCTTATC	TPL Mutagenesis primer
TPL_L8S_F	TAGTAGAGAGtctGTTTTCTTGATCTTACAG	TPL Mutagenesis primer
TPL_L8S_R	AGAGAAGACATCATTTTGTG	TPL Mutagenesis primer
TPL_I12T_F	CGTTTTCTTGactTTACAGTATCTCGATGAAG	TPL Mutagenesis primer
TPL_I12T_R	AGCTCTCTACTAAGAGAAG	TPL Mutagenesis primer
TPL_L8S_I12T_F	cttgactTTACAGTATCTCGATGAAG	TPL Mutagenesis primer
TPL_L8S_I12T_R	aaaacagaCTCTCTACTAAGAGAAGAC	TPL Mutagenesis primer
TPL_S5A_E19S_F	cttacagtatctcgatgaatctAAGTTTAAAGAGACTGTTCAC	TPL Mutagenesis primer
TPL_S5A_E19S_R	atcaagaaaacgagctctctagcAAGAGAAGACATCATTTTGTG	TPL Mutagenesis primer
TPL_T24A_E31S_F	cttgaacaatctTCTGGGTTTTTCTTCAATATG	TPL Mutagenesis primer
TPL_T24A_E31S_R	cttgtgaacagcCTCTTTAAACTTCTCTTCATC	TPL Mutagenesis primer
TPL_G23S_L27S_F	tcactctTCTGGGTTTTTCTTCAATATG	TPL Mutagenesis primer
TPL_G23S_L27S_R	acagtagaCTCTTTAAACTTCTCTTCATC	TPL Mutagenesis primer
TPL_Delhelix_3-9bsaIR	atatatGGTCTCcctcccCCCAGATTCTTGTTCAAG	TPL Mutagenesis primer
TPL_Delhelix_4-9bsaIR	atatatGGTCTCcctcccATTTCCATTGTGAACCTC	TPL Mutagenesis primer
TPL_Delhelix_5-9bsaIR	atatatGGTCTCcctcccATTATCATCTACTTTAGTGAAAC	TPL Mutagenesis primer
TPL_Delhelix_6-9bsaIR	atatatGGTCTCcctcccGGGACGATCATGCTTATC	TPL Mutagenesis primer
TPL_Delhelix_7-9bsaIR	atatatGGTCTCcctcccATTAAAAGTTGAAAACACTTTCAAATC	TPL Mutagenesis primer
TPL_Delhelix_8-9bsaIR	atatatGGTCTCcctcccGTCCCCATACTTGGATAAC	TPL Mutagenesis primer
TPL_Delhelix_9bsaIR	atatatGGTCTCcctcccATTTCTAAGAGTAGGGAAC	TPL Mutagenesis primer
TPL188_bsaI_R	atatatGGTCTCcctcccATTTTTACAAAGCTGGTGTTGC	TPL yeast construct cloning
IAA3_bsaI_R	atatatGGTCTCcagaaTTATACACCACAGCCTAAACCTTTGGCT	TPL yeast construct cloning
TPL188_bsaI_R	atatatGGTCTCcctccATTTTTACAAAGCTGGTGTTGC	TPL yeast construct cloning
ACTMED13_GSlink_F	ggatctggatctggctctATGTGGACTAATGTTTTCAG	MED13 Mutagenesis
TPL188_ExpF	aaaacctctacttccaatcGATGTCTTCTCTTAGTAGAGAGCTCG	TPL Ecoli Expression
TPL188_ExpR	ccacactcatcctccggTTATTACTAATTTTTACAAAGCTGGTGTTG	TPL Ecoli Expression
FKBP1_F2	GGTCGACGGATCCCCGGGTT	Anchor Away Genotyping
FKBP1_R1	TCGATGAATTCGAGCTCGTT	Anchor Away Genotyping
RPL13A_F1	AAATGGTAAGGCCCCAGAAG	Anchor away cloning
RPL13A_F2	AACTATCGGTATCGCCGTTG	Anchor away cloning
RPL13A_R1	TAAGTGATGGCTTCCCGTTT	Anchor away cloning
RPL13A_R2	GTTGTGCTCGAAGGAAAAGC	Anchor away cloning
TPL202_R	ccacactcatcctccggTTATTActaGTGATCCACAAAAAGAGTCTTGA	TPL Ecoli Expression
ACTMED13_GSlink_F	ggatctggatctggctctATGTGGACTAATGTTTTCAG	MED13 - TPL Y2H
MED13Del_Itocdna_R	CCTGGCATCCGTCCAGAT	MED13 - TPL Y2H
MED13Del_Itocdna_F	GTTCTGCAGCAGGGATGTC	MED13 - TPL Y2H
ACTMED13_GSlink_F	ggatctggatctggctctATGTGGACTAATGTTTTCAG	AtMED13 Cloning primer
ACTMED13_GSlink_R	tgatcctgagccactgccGCTAGCGTAATCTGGAAC	AtMED13 Cloning primer
MED13_C968_F	GTTTTTCCTTCGTCTGTCATTAC	AtMED13 Cloning primer
MED13_N968_R	CATAAGGGCGAATTCGGAG	AtMED13 Cloning primer
MED13_N967_F	TAAAGGGCGAATTCGACC	AtMED13 Cloning primer
MED13_N967_R	CTCAGCAGAGAGTGGATC	AtMED13 Cloning primer
TPL_tetratripmut_F	gacattgtctAACTTCCGGGAGAATGAAC	TPL Mutagenesis primer
TPL_tetratripmut_R	aagagagaagcTATTTCCTTGAAAAGCTCC	TPL Mutagenesis primer
TPL_K102A_F	GAAGGATTTGgctGTGTTTTCAACTTTTAATG	TPL Mutagenesis primer
TPL_K102A_R	ACTAGTATATCCACAGCC	TPL Mutagenesis primer
TPL_5G2_BsaIF	atatatggtctcgaatgtctagaactagtggatccccc	TPL yeast construct cloning
IAA3_5G2_BsaIR1	atatatggtctccagaaTcatACACCACAGCCTAAACCT	TPL yeast construct cloning
TPL_delto188F	GGTGGACCAGGTGGTGGA	TPL Mutagenesis primer
TPL_delto188R	ATTTTTACAAAGCTGGTGTTGCCAATTTAAG	TPL Mutagenesis primer
HD1_Clon_R	TTATGTTTTAGGAGGAAACGCC	HD1 cloning primer
HD1_Clon_F	ATGGATACTGGCGGCAA	HD1 cloning primer
HD1_RT3	TCATCATTCAGACATGCAACG	HD1 cloning primer
HD1_RT2	TCATTCAGACATGCAACGAA	HD1 cloning primer
HD1_RT1	TCCGTGCTCAATCCTCTAAAA	HD1 cloning primer
MED12_SeqF10	GCCAATCCTCCTTCCTTCTC	Sequencing primer
MED12_SeqF9	AGTCCCAGTGTTGGCTATGG	Sequencing primer
MED12_SeqF8	TGCCATCCTCTGGTTATTCC	Sequencing primer
MED12_SeqF7	CTGTGAAGGGATCACGAGGT	Sequencing primer
MED12_SeqF6	GCGATCAGGAAATGGTGAGT	Sequencing primer
MED12_SeqF5	CTTCCACCCCTGTGGATATG	Sequencing primer
MED12_SeqF4	TTCCACTTCCCTTTCGTCTG	Sequencing primer
MED12_SeqF3	AGAGATTTCCGTGCTGGTGT	Sequencing primer
MED12_SeqF2	TTGCTGTCCGTTTCATTCAG	Sequencing primer
MED12_SeqF1	TCCCACTATTGAGAGCTACTTGG	Sequencing primer
MED13_cDNAR2	TTAAACTCCTGTCTTATCAGGTATCCTGGAGAC	Amplifying MED13/MAB2 cDNA (at1g55325.1 isoform)
MED13_cDNAR3	TTAAACTCCTGTCTTATCAGGTATCC	Amplifying MED13/MAB2 cDNA (at1g55325.1 isoform)
MED13_RT_4	AGACTACTCGGGAGGTGCAG	Amplifying MED13/MAB2 cDNA (at1g55325.1 isoform)
MED13_RT_5	GAGGTGCAGGATGAAGTTCG	Amplifying MED13/MAB2 cDNA (at1g55325.1 isoform)
MED13_RT_6	CAGGATGAAGTTCGCTGAAAG	Amplifying MED13/MAB2 cDNA (at1g55325.1 isoform)
TPL_Delhelix_9R	ATTTCTAAGAGTAGGGAAC	TPL-helix-by-helix deletion series
TPL_Delhelix_9F	TAACACCCAGCTTTCTTG	TPL-helix-by-helix deletion series
TPL_Delhelix_8-9R	GTCCCCATACTTGGATAAC	TPL-helix-by-helix deletion series
TPL_Delhelix_8-9F	TAACACCCAGCTTTCTTG	TPL-helix-by-helix deletion series
TPL_Delhelix_7-9R	ATTAAAAGTTGAAAACACTTTCAAATC	TPL-helix-by-helix deletion series
TPL_Delhelix_7-9F	TAACACCCAGCTTTCTTG	TPL-helix-by-helix deletion series
TPL_Delhelix_6-9R	GGGACGATCATGCTTATC	TPL-helix-by-helix deletion series
TPL_Delhelix_6-9F	TAACACCCAGCTTTCTTG	TPL-helix-by-helix deletion series
TPL_Delhelix_5-9R	ATTATCATCTACTTTAGTGAAAC	TPL-helix-by-helix deletion series
TPL_Delhelix_5-9F	TAACACCCAGCTTTCTTG	TPL-helix-by-helix deletion series
TPL_Delhelix_4-9R	ATTTCCATTGTGAACCTC	TPL-helix-by-helix deletion series
TPL_Delhelix_4-9F	TAACACCCAGCTTTCTTG	TPL-helix-by-helix deletion series
TPL_Delhelix_3-9R	CCCAGATTCTTGTTCAAG	TPL-helix-by-helix deletion series
TPL_Delhelix_3-9F	TAACACCCAGCTTTCTTG	TPL-helix-by-helix deletion series
pHEE401E_DelCas9_R	TATAACCATGGTATTGGTTTATC	Remove CAS9 from pHEE401E
pHEE401E_DelCas9_F	GAATTCGTAATCATGTCATAG	Remove CAS9 from pHEE401E
pHEE401E_R1	ttccagctcagtggatctctg	CRISPR 4 guide sequencing primer
3rd_guide_seq	CGTGAGTGTGAGTGAGACTTGCATA	CRISPR 4 guide sequencing primer
2nd_guide_seq	TTAATCCAAACTACTGCAGCCTGAC	CRISPR 4 guide sequencing primer
DT2-BsR3	ATATTATTGGTCTCatcactacttcgtctctaaccat	CRISPR 4 guide primer
MED13_cDNA_F	ATGTGGACTAATGTTTTCAGAATTGGTGGTC	Amplifying MED13/MAB2 cDNA (at1g55325.2 isoform)
MED13_cDNA_R	TTAAGCCATGTGATGCATAGAAGAAAGTGG	Amplifying MED13/MAB2 cDNA (at1g55325.2 isoform)
MED13_cDNA_F2nest	ATCCCCAAGTGATGTGGACT	Amplifying MED13/MAB2 cDNA (at1g55325.2 isoform)
MED12_cDNA_F	ATGCAAAGGTATCATGCTGCCAACTG	Amplifying MED12 cDNA
MED12_cDNA_R	TCAGCTGTCGTCGTCTACTGAACC	Amplifying MED12 cDNA
CYCC1_cDNA_F	aTGGCTGCCAATTTCTGGAATTCATCTCA	Amplifying CYCC;1.2 cDNA
CYCC1_cDNA_R	CTACAGCTTCAAAGCCAATTTGCTGAAGG	Amplifying CYCC;1.2 cDNA
MAB2_seqF1	GTAGCACCTGGGGACTCTGA	Cloning MED13/MAB2
MAB2_seqF2	AACTTGCCCCATAACCAGTG	Cloning MED13/MAB2
MAB2_seqF3	GGCATGGATATCAAGGCACT	Cloning MED13/MAB2
MAB2_seqF4	GATGGAGCAGGCGATATGAT	Cloning MED13/MAB2
MAB2_seqF5	AAACCTGCTAGTTCGCCAAA	Cloning MED13/MAB2
MAB2_seqF6	GATGGTGGGAAAGGAGATGA	Cloning MED13/MAB2
MAB2_seqF7	TGTCCATTTCCTGACCCTTC	Cloning MED13/MAB2
MAB2_seqF8	GTTCTGGACCTGGCATGAAT	Cloning MED13/MAB2
MAB2_seqF9	TCCCTGCATTTTGTTCTTCC	Cloning MED13/MAB2
MAB2_seqF10	TGAGACGTCTTCTTCACTTTGC	Cloning MED13/MAB2
MAB2_SeqR1	GAATGACGCCCAGGTAGAAA	Cloning MED13/MAB2
MED13_RT_R1	AGACTACTCGGGAGGTGCAG	Cloning MED13/MAB2
MED13_RT_R2	GAGGTGCAGGATGAAGTTCG	Cloning MED13/MAB2
MED13_RT_R3	CAGGATGAAGTTCGCTGAAAG	Cloning MED13/MAB2
CYC1_RT_R1	TTGCCACAAAGCTAGATGGA	cloning CYC
CYC1_RT_R2	ATGGGCAATTGTGGAAGTCT	cloning CYC
CYC1_RT_R3	TAGATGGATGGGCAATTGTG	cloning CYC
MED12_RT_R1	ACCCGAAGATCCAAGCtttt	cloning MED12
MED12_RT_R2	CCGAAGATCCAAGCtttttG	cloning MED12
MED12_RT_R3	TTCTTCATGAGCCCCTCAAT	cloning MED12
U6-1p-R	TATGCAAGTCTCACTCACACTCACG	Sequencing primers for CRISPR construct
U6-29t-F	CGTGTTTCAGCTCTCATGATCCTTG	Sequencing primers for CRISPR construct
U6-29p-R	AGCCCTCTTCTTTCGATCCATCAAC	Sequencing primers for CRISPR construct
U6-29p-F	TTAATCCAAACTACTGCAGCCTGAC	Sequencing primers for CRISPR construct
U6-26p-F	TGTCCCAGGATTAGAATGATTAGGC	Sequencing primers for CRISPR construct
Hyg_R	gtgcttgacattggggagtt	UAS TPL-IAA14 sequencing
Hyg_F	gatgttggcgacctcgtatt	UAS TPL-IAA14 sequencing
HEN3 R	AGAAAGCTGGGTGTTAGAGGCGTCTGGATTTGTTAGGAGGT	Cloning HEN3
HEN3 F	AAAAAGCAGGCTTCAAAATGGGAGATGGGAGTTCCAGTAGATCC	Cloning HEN3
CYCC R	AGAAAGCTGGGTGCTACAGCTTCAAAGCCAATTTGCTGAAG	Cloning CYCC
CYCC F	AAAAAGCAGGCTTCAAAATGGCTGCCAATTTCTGGAATTCAT	Cloning CYCC
MAB2 R	AGAAAGCTGGGTGTTAAGCCATGTGATGCATAGAAGAAAGTGG	Cloning MAB2
MAB2 F	AAAAAGCAGGCTTCAAAATGTGGACTAATGTTTTCAGAATTGGTGGTC	Cloning MAB2
CRP R	AGAAAGCTGGGTGTCAGCTGTCGTCGTCTACTGAACCA	Cloning CRP
CRP F	AAAAAGCAGGCTTCAAAATGCAAAGGTATCATGCTGCCAACT	Cloning CRP
WUS (positive control) R	AGAAAGCTGGGTGCTAGTTCAGACGTAGCTCAAGAGAAGCG	Cloning WUS
WUS (positive control) F	AAAAAGCAGGCTTCAAAATGGAGCCGCCACAGCA	Cloning WUS
MED21 R	AGAAAGCTGGGTGTCATTCAGGTTTCTTCATGTTCAGGC	Cloning MED21
MED21 F	AAAAAGCAGGCTTCAAAATGGATATAATCTCACAGTTGCAAGAACAAGTG	Cloning MED21
MED18 R	AGAAAGCTGGGTGTTACAATGTAGTACCTCCTCCATCCGAC	Cloning MED18
MED18 F	AAAAAGCAGGCTTCAAAATGTCAATGGAGTGTGTGGTTCAAGG	Cloning MED18
HIS4 R	AGAAAGCTGGGTGTCAACCACCAAATCCATATAGAGTTCTTCC	Cloning HIS4
HIS4 F	AAAAAGCAGGCTTCAAAATGTCAGGAAGAGGAAAAGGAGGAAAAG	Cloning HIS4
HDA6 R	AGAAAGCTGGGTGTTAAGACGATGGAGGATTCACGTCTG	Cloning HDACS
HDA6 F	AAAAAGCAGGCTTCAAAATGGAGGCAGACGAAAGCGG	Cloning HDACS
HDA9 R	AGAAAGCTGGGTGTTATGACGCATCGTTATCGTTGTCTC	Cloning HDACS
HDA9 F	AAAAAGCAGGCTTCAAAATGCGTTCCAAGGACAAAATCTCTTACTT	Cloning HDACS
HD1 (HDA19) R	AGAAAGCTGGGTGTTATGTTTTAGGAGGAAACGCCTGCTC	Cloning HDACS
HD1 (HDA19) F	AAAAAGCAGGCTTCAAAATGGATACTGGCGGCAATTCG	Cloning HDACS
CTLH_F	TTTCTTCAATATGAAGTATTTTGAGGATGAGGTT	TPL Sequencing
CTLH_R	CTTGGGACGATCATGCTTATCCAA	TPL Sequencing
SPARC_A1_F	AGACTTTAGATATCAAATGACTCCACGT	CHiP-qPCR
SPARC_A1end_R	AAACCAATCCAATATCGAgagacaagt	CHiP-qPCR
scSUC2_qF1	GCAAATTACCAGTCGGTATGC	CHiP-qPCR
scSUC2_qR1	GCACGCCTTTGGTAGAAGAAT	CHiP-qPCR
ACT1_R	AAATGGCGTGAGGTAGAGAGAAAC	CHiP-qPCR
ACT1_F	TGGATTCCGGTGATGGTGTT	CHiP-qPCR
PMA1_qF2	tcttcagcatcttctGTTTCAGC	CHiP-qPCR
PMA1_qR2	CAGCGTCATCGTAAGTCTTAGC	CHiP-qPCR
